# Supplementary material for: Intratumor Heterogeneity Affects Gene Expression Profile Test Prognostic Risk Stratification in Early Breast Cancer
Source: Oxford University Press journal article supplement (doi:10.1158/1078-0432.ccr-15-2889), 2016-05-16
Supplement: 10780432ccr152889-sup-158409_1_supp_3391641_d3dqbr.xlsx [file 10780432ccr152889-sup-158409_1_supp_3391641_d3dqbr.xlsx]

## Sheet: Sheet1
Supplementary Table S2: Immunohistochemical expression levels for ER, PR, HER2 and Ki67.
	*WSLI = Whole slide labeling index/ percentage of positive cells within the entire tumor section
	*HSLI = Hot spot labeling index/ percentage of positive cells in the most densely staining regions of the section
	Patient #	ER H-score	PR H-score	Ki-67 WSLI*	Ki-67 HSLI*	Difference (HSLI-WSLI)	High-Ki67 core	Low-PR core
	2	210	215	15	20	5	no	no
	3	290	50	40	45	5	no	yes
	5	220	90	20	30	10	yes	yes
	6	265	230	18	20	2	no	no
	7	290	175	20	25	5	no	no
	8	230	210	45	55	10	yes	no
	9	215	160	10	35	25	yes	no
	10	290	0.5	1	1	0	no	no
	12	285	8	40	50	10	yes	no
	13	300	140	12	15	3	no	no
	14	300	175	5	12	7	no	no
	15	300	115	15	30	15	yes	no
	16	205	200	20	25	5	no	no
	18	50	15	20	35	15	yes	no
	19	260	155	50	70	20	yes	no
	20	295	160	10	15	5	no	no
	21	300	7	15	20	5	no	no
	22	225	150	30	40	10	yes	no
	23	50	185	5	10	5	no	no
	24	260	195	20	25	5	no	no
	25	265	160	12	18	6	no	no
	26	300	0.5	15	20	5	no	no
	27	195	225	30	40	10	yes	no
	28	300	230	30	35	5	no	no
	29	80	100	70	80	10	yes	no
	30	235	145	60	70	10	yes	no
	31	180	210	35	45	10	yes	no
	32	255	1	25	30	5	no	no
	33	280	120	50	70	20	yes	no
	34	250	190	22	25	3	no	no
	35	200	200	30	35	5	no	no
	37	295	65	35	40	5	no	yes
	38	240	145	50	60	10	yes	no
	39	145	75	30	60	30	yes	yes
	40	220	5	25	45	20	yes	no
	41	150	180	30	45	5	no	no
	42	290	265	20	25	5	no	no
	43	300	35	25	25	5	no	yes
	44	240	290	5	10	5	no	no
	45	230	70	10	15	5	no	yes
	47	225	210	25	50	25	yes	no
	48	265	160	15	25	10	yes	no
	49	300	250	25	30	5	no	no
	50	260	80	2	5	3	no	yes
	51	165	265	10	15	5	no	no
	52	300	270	40	45	5	no	no
	53	285	205	15	20	5	no	no
	54	265	255	15	18	3	no	no
	55	205	155	20	35	15	yes	no
	56	200	35	2	5	3	no	yes
	57	270	255	20	25	5	no	no
	58	215	80	5	15	10	yes	yes
	59	290	150	20	25	5	no	no
	60	290	105	15	20	5	no	no
	61	260	145	20	25	5	no	no
	62	255	65	35	50	15	yes	yes
	63	285	90	12	15	3	no	yes
	64	190	200	10	15	5	no	no
	65	285	80	45	55	10	yes	yes
	66	260	240	8	12	4	no	no
	67	290	175	20	25	5	no	no
	68	250	130	22	30	8	no	no
	69	260	45	35	45	10	yes	yes
	70	205	135	20	25	5	no	no
	71	275	250	15	20	5	no	no
	72	225	60	15	18	3	no	yes
	73	155	110	50	65	15	yes	no
	74	290	45	30	45	15	yes	no
	75	290	175	15	18	3	no	no
	76	285	250	20	25	5	no	no
	77	160	150	30	40	10	yes	no
