# Supplementary material for: Intratumor Heterogeneity Affects Gene Expression Profile Test Prognostic Risk Stratification in Early Breast Cancer
Source: Oxford University Press journal article supplement (doi:10.1158/1078-0432.ccr-15-2889), 2016-05-16
Supplement: 10780432ccr152889-sup-158409_1_supp_3391643_c3cqbr.xlsx [file 10780432ccr152889-sup-158409_1_supp_3391643_c3cqbr.xlsx]

## Sheet: Correlation all genes
Supplementary Table S4: Correlation of nstringRS between different types of tumor samples (Section, core, Ki67, and PR).
S. No.	Gene	Section VS tumor-rich core	Section VS High Ki67 core	Section VS Low PR core	Core VS High Ki67 core	Core VS Low PR core	High Ki67 core VS Low PR core
1	ACTR3B	0.78378	0.791188	0.758016	0.804719	0.899971	0.994272
2	AKAP2	0.697185	0.510552	0.330368	0.471534	0.602394	0.960003
3	ALDH4A1	0.845431	0.863195	0.729535	0.860754	0.757671	0.6938
4	ANLN	0.90262	0.880573	0.780586	0.878096	0.766711	0.817843
5	AP2B1	0.909447	0.902075	0.72799	0.921563	0.78291	0.873124
6	AURKA	0.831149	0.819995	0.923437	0.851783	0.669742	0.380959
7	AYTL2	0.849731	0.899541	0.747658	0.724454	0.589237	0.908732
8	AZGP1	0.905008	0.88848	0.915561	0.810139	0.898576	0.910895
9	BAG1	0.952949	0.965333	0.883461	0.955423	0.904841	0.863242
10	BBC3	0.669406	0.633445	0.343616	0.744287	0.147428	-0.356441
11	BCL2	0.925048	0.867059	0.894584	0.845814	0.87733	0.983438
12	BIRC5	0.956879	0.93514	0.968589	0.924365	0.91704	0.724638
13	BLVRA	0.921093	0.928965	0.832819	0.929256	0.77155	0.968144
14	BUB1B	0.895569	0.86298	0.882545	0.824598	0.853476	0.636113
15	C16orf61	0.917069	0.918649	0.833957	0.862559	0.829647	0.634847
16	C20orf46	0.785043	0.755953	0.729157	0.704337	0.348903	0.848647
17	C9orf30	0.777003	0.851536	0.59649	0.589888	0.727841	0.941974
18	CCNB1	0.928818	0.948376	0.936681	0.906182	0.884648	0.672963
19	CCNE1	0.703684	0.715819	0.873561	0.712994	0.835969	0.54472
20	CCNE2	0.876984	0.880215	0.848999	0.891468	0.750135	0.370231
21	CD68	0.657473	0.631003	0.772893	0.582409	0.490905	0.69235
22	CDC20	0.877543	0.96255	0.912132	0.911689	0.790917	0.666966
23	CDC42BPA	0.932745	0.951927	0.941326	0.934213	0.913505	0.985387
24	CDC6	0.884821	0.914243	0.859486	0.809701	0.838747	0.553435
25	CDCA1	0.689796	0.839432	0.585856	0.844409	0.537581	0.298704
26	CDCA7	0.791152	0.769007	0.898604	0.645896	0.902759	0.917782
27	CDH3	0.800809	0.879652	0.873812	0.847582	0.715878	0.873422
28	CEGP1	0.938777	0.872729	0.791812	0.88501	0.882327	0.687787
29	CENPA	0.888411	0.911547	0.909193	0.922304	0.848581	0.602333
30	CENPF	0.916791	0.905646	0.781036	0.88517	0.711659	0.29762
31	CEP55	0.83907	0.871128	0.913761	0.887687	0.826899	0.512737
32	COL4A2	0.784898	0.472824	0.56859	0.498638	0.662457	0.743794
33	CTSL2	0.466283	0.399878	0.626121	0.242149	0.489803	0.449196
34	CXXC5	0.921678	0.936293	0.9427	0.932698	0.914121	0.94428
35	DCK	0.847236	0.787187	0.758317	0.829999	0.869644	0.542256
36	DHCR7	0.808838	0.85265	0.839717	0.764124	0.814885	0.87731
37	DIAPH3	0.78817	0.842596	0.66327	0.718666	0.715007	0.150774
38	DTL	0.843219	0.72591	0.88882	0.779384	0.640544	-0.336229
39	EBF4	0.895164	0.896004	0.895097	0.816221	0.604399	0.831481
40	ECT2	0.937995	0.847946	0.918468	0.761969	0.834905	0.370769
41	EGFR	0.63148	0.435249	0.708198	0.578514	0.496912	0.869695
42	EGLN1	0.908528	0.823854	0.819445	0.705828	0.798493	0.524563
43	ERBB2	0.950902	0.960423	0.873361	0.941608	0.884243	0.913219
44	ESM1	0.741429	0.618032	0.823446	0.684155	0.676956	0.162455
45	ESR1	0.951959	0.898733	0.816402	0.881006	0.83614	0.760612
46	EXO1	0.818246	0.800202	0.763433	0.835941	0.543481	0.179794
47	EXT1	0.861866	0.788286	0.841112	0.636342	0.808028	0.80428
48	FGF18	0.627472	0.575057	0.747805	0.64998	0.636867	0.566843
49	FGFR4	0.899483	0.829557	0.814498	0.826531	0.513103	0.606097
50	FLT1	0.848621	0.822779	0.846516	0.727189	0.892701	0.798559
51	FOXA1	0.838482	0.710719	0.728945	0.64019	0.620849	0.582438
52	FOXC1	0.712606	0.750407	0.32926	0.710337	0.195562	0.96331
53	GMPS	0.924621	0.778468	0.902919	0.817108	0.926017	0.905352
54	GNAZ	0.815028	0.84439	0.663751	0.655575	0.581196	0.329278
55	GPR126	0.869909	0.900782	0.945415	0.890563	0.904885	0.966288
56	GPR160	0.86464	0.835354	0.7505	0.79071	0.803128	0.933411
57	GPR180	0.821218	0.900971	0.331536	0.832637	0.540046	0.52613
58	GRB7	0.943144	0.964216	0.931386	0.945471	0.931855	0.854637
59	GSTM1	0.976021	0.956559	0.954443	0.956078	0.96057	0.763638
60	GSTM3	0.905723	0.930692	0.841522	0.941729	0.866015	0.979756
61	HOXB13	0.832287	0.858449	0.755352	0.884334	0.724472	0.949584
62	HRASLS	0.786264	0.758113	0.335935	0.832993	0.19654	-0.867941
63	IGFBP5	0.908823	0.874505	0.856138	0.727657	0.698327	0.995485
64	IL17R	0.905906	0.797084	0.82263	0.770451	0.936656	0.762559
65	IL6ST	0.945045	0.911104	0.91831	0.874541	0.876575	0.901736
66	JHDM1D	0.798458	0.713381	0.695059	0.448474	0.646074	0.619765
67	KIF2C	0.879718	0.929747	0.945205	0.860972	0.913973	0.893378
68	KNTC2	0.896187	0.796875	0.769649	0.837904	0.616043	-0.155939
69	KRT14	0.554976	0.524014	0.684127	0.60885	0.376254	0.789991
70	KRT17	0.642517	0.554326	0.514383	0.554707	0.103704	0.601092
71	KRT5	0.615996	0.574773	0.668912	0.686729	0.417213	0.923789
72	LGP2	0.887877	0.876697	0.729524	0.833189	0.847998	0.690686
73	LIN9	0.779939	0.855547	0.674186	0.799716	0.670833	0.653628
74	LOC100131053	0.714789	0.719334	0.563124	0.692598	0.52334	0.844375
75	LOC100288906	0.724425	0.613265	0.695107	0.602893	0.258155	0.810653
76	MAPT	0.934611	0.920844	0.861897	0.891631	0.879635	0.821248
77	MCM6	0.87941	0.850812	0.726593	0.859755	0.775491	0.621793
78	MDM2	0.910535	0.895068	0.847885	0.867417	0.783565	0.926539
79	MELK	0.880104	0.858026	0.758684	0.87003	0.590378	0.157147
80	MGP	0.876876	0.766202	0.813535	0.778316	0.889355	0.943171
81	MIA	0.689221	0.736668	0.739094	0.616408	0.723304	0.952222
82	MKI67	0.909221	0.908701	0.912578	0.924854	0.881177	0.78121
83	MLPH	0.916967	0.905824	0.839351	0.793007	0.697844	0.953317
84	MMP11	0.85801	0.725873	0.926187	0.856857	0.861581	0.637323
85	MMP9	0.583273	0.618558	0.584864	0.716519	0.807693	0.584069
86	MS4A7	0.903156	0.768064	0.923807	0.634496	0.863045	0.914535
87	MTDH	0.898843	0.944685	0.884674	0.914064	0.930709	0.936178
88	MYBL2	0.922776	0.904452	0.932472	0.917741	0.904208	0.691372
89	MYC	0.711358	0.905641	0.78175	0.651102	0.857699	0.284717
90	NAT1	0.938621	0.868718	0.764997	0.871975	0.82084	0.745415
91	NEK2	0.891857	0.861252	0.923435	0.838084	0.760151	0.426906
92	NMU	0.780523	0.826949	0.673872	0.793262	0.52123	0.282861
93	NUSAP1	0.897661	0.885697	0.883771	0.872081	0.857773	0.107727
94	ORC6L	0.889194	0.842637	0.855801	0.849879	0.832988	0.74301
95	OXCT1	0.87253	0.860324	0.647346	0.961426	0.831609	0.971328
96	PALM2	0.600809	0.628676	0.437838	0.69067	0.549421	0.7044
97	PECI	0.81133	0.590393	0.807644	0.443998	0.517415	0.609123
98	PGR	0.921444	0.790216	0.485376	0.59047	0.532371	0.984552
99	PHGDH	0.86502	0.839752	0.810581	0.861297	0.84073	0.878014
100	PITRM1	0.888191	0.905794	0.904146	0.867345	0.88459	0.949066
101	PRC1	0.907616	0.932625	0.840484	0.894133	0.905912	0.722777
102	PTTG1	0.903608	0.959888	0.909049	0.931731	0.856279	0.430474
103	QSCN6L1	0.855195	0.870128	0.56865	0.748436	0.820366	0.832782
104	RAB6B	0.529227	0.605156	0.496	0.553073	0.13488	0.833441
105	RACGAP1	0.810813	0.55377	0.539143	0.598312	0.215329	0.586728
106	RASSF7	0.89011	0.737085	0.856155	0.669361	0.797778	-0.272868
107	RBBP8	0.926149	0.909963	0.932166	0.81183	0.956005	0.86758
108	RECQL5	0.925569	0.936469	0.924313	0.934018	0.944594	0.962727
109	RFC4	0.832663	0.620123	0.802268	0.597333	0.674538	-0.222717
110	RRM2	0.911382	0.928402	0.919586	0.909853	0.794944	0.635837
111	RTN4RL1	0.92974	0.90405	0.857349	0.830637	0.928455	0.830108
112	RUNDC1	0.860456	0.823971	0.891096	0.859079	0.833833	0.947026
113	SERF1A	0.893807	0.900953	0.876999	0.888932	0.809702	0.897446
114	SFRP1	0.554185	0.524504	0.673703	0.534852	0.614995	0.860084
115	SLC2A3	0.520659	0.474275	0.623922	0.61208	0.616851	0.915824
116	SLC39A6	0.936196	0.934277	0.935756	0.821294	0.837853	0.98465
117	STC2	0.941998	0.890942	0.89552	0.875527	0.684051	0.925066
118	STK32B	0.91239	0.834743	0.825741	0.848297	0.691318	0.927471
119	TGFB3	0.859536	0.682944	0.879028	0.743678	0.939267	0.933107
120	TMEM45B	0.82136	0.686676	0.927043	0.659726	0.771324	0.946372
121	TSPYL5	0.955255	0.93295	0.907104	0.946832	0.798248	0.956007
122	TYMS	0.880263	0.906935	0.769587	0.854628	0.774601	0.129946
123	UBE2C	0.938904	0.916029	0.972596	0.873892	0.951386	0.87058
124	UBE2T	0.926926	0.928992	0.872883	0.877739	0.884495	0.654708
125	UCHL5	0.817297	0.713746	0.66469	0.787956	0.790429	0.237353
126	WISP1	0.861156	0.692284	0.930215	0.817918	0.757169	0.964909
127	ZNF533	0.8576	0.822315	0.794661	0.803006	0.815156	0.720145
