# Supplementary material for: Intratumor Heterogeneity Affects Gene Expression Profile Test Prognostic Risk Stratification in Early Breast Cancer
Source: Oxford University Press journal article supplement (doi:10.1158/1078-0432.ccr-15-2889), 2016-05-16
Supplement: 10780432ccr152889-sup-158409_1_supp_3408357_c474s6.xlsx [file 10780432ccr152889-sup-158409_1_supp_3408357_c474s6.xlsx]

## Sheet: Gene List
Supplementary Table S3: NanoString nCounter gene expression data for all GEPs.
1)	List of genes analyzed in 5 MGTs and their respective housekeeping genes (HKGs).
	Oncotype Dx	MammaPrint	PAM50	EndoPredict	Breast Cancer Index	All genes
	16 Genes	66 Genes	50 Genes	8 Genes	7 Genes	127 Genes
	AURKA	AA555029_RC	ACTR3B	AZGP1	BUB1B	ACTR3B
	BAG1	AKAP2	ANLN	BIRC5	CENPA	AKAP2
	BCL2	ALDH4A1	BAG1	DHCR7	HOXB13	ALDH4A1
	BIRC5	AP2B1	BCL2	IL6ST	IL17R	ANLN
	CCNB1	AYTL2	BIRC5	MGP	NEK2	AP2B1
	CD68	BBC3	BLVRA	RBBP8	RACGAP1	AURKA
	CEGP1	C16orf61	CCNB1	STC2	RRM2	AYTL2
	CTSL2	C20orf46	CCNE1	UBE2C		AZGP1
	ERBB2	C9orf30	CDC20		4 HKGs	BAG1
	ESR1	CCNE2	CDC6	3 HKGs	ACTB	BBC3
	GRB7	CDC42BPA	CDCA1	CALM2	HMBS	BCL2
	GSTM1	CDCA7	CDH3	OAZ1	SDHA	BIRC5
	MKI67	CEGP1	CENPF	RPL37A	UBC	BLVRA
	MMP11	CENPA	CEP55			BUB1B
	MYBL2	COL4A2	CXXC5	Total = 11	Total = 11	C16orf61
	PGR	DCK	EGFR			C20orf46
		DIAPH3	ERBB2			C9orf30
	5 HKGs	DTL	ESR1			CCNB1
	ACTB	EBF4	EXO1			CCNE1
	GAPDH	ECT2	FGFR4			CCNE2
	GUSB	EGLN1	FOXA1			CD68
	RPLP0	ESM1	FOXC1			CDC20
	TFRC	EXT1	GPR160			CDC42BPA
		FGF18	GRB7			CDC6
	Total = 21	FLT1	KIF2C			CDCA1
		GMPS	KNTC2			CDCA7
		GNAZ	KRT14			CDH3
		GPR126	KRT17			CEGP1
		GPR180	KRT5			CENPA
		GSTM3	MAPT			CENPF
		HRASLS	MDM2			CEP55
		IGFBP5	MELK			COL4A2
		JHDM1D	MIA			CTSL2
		KNTC2	MKI67			CXXC5
		LGP2	MLPH			DCK
		LIN9	MMP11			DHCR7
		LOC100131053	MYBL2			DIAPH3
		LOC100288906	MYC			DTL
		MCM6	NAT1			EBF4
		MELK	ORC6L			ECT2
		MMP9	PGR			EGFR
		MS4A7	PHGDH			EGLN1
		MTDH	PTTG1			ERBB2
		NMU	RRM2			ESM1
		NUSAP1	SFRP1			ESR1
		ORC6L	SLC39A6			EXO1
		OXCT1	TMEM45B			EXT1
		PALM2	TYMS			FGF18
		PECI	UBE2C			FGFR4
		PITRM1	UBE2T			FLT1
		PRC1				FOXA1
		QSCN6L1	5 HKGs			FOXC1
		RAB6B	ACTB			GMPS
		RASSF7	MRPL19			GNAZ
		RECQL5	PSMC4			GPR126
		RFC4	RPLP0			GPR160
		RTN4RL1	SF3A1			GPR180
		RUNDC1				GRB7
		SERF1A	Total = 55			GSTM1
		SLC2A3				GSTM3
		STK32B				HOXB13
		TGFB3				HRASLS
		TSPYL5				IGFBP5
		UCHL5				IL17R
		WISP1				IL6ST
		ZNF533				JHDM1D
						KIF2C
		0 HKGs				KNTC2
						KRT14
		Total = 66				KRT17
						KRT5
						LGP2
						LIN9
						LOC100131053
						LOC100288906
						MAPT
						MCM6
						MDM2
						MELK
						MGP
						MIA
						MKI67
						MLPH
						MMP11
						MMP9
						MS4A7
						MTDH
						MYBL2
						MYC
						NAT1
						NEK2
						NMU
						NUSAP1
						ORC6L
						OXCT1
						PALM2
						PECI
						PGR
						PHGDH
						PITRM1
						PRC1
						PTTG1
						QSCN6L1
						RAB6B
						RACGAP1
						RASSF7
						RBBP8
						RECQL5
						RFC4
						RRM2
						RTN4RL1
						RUNDC1
						SERF1A
						SFRP1
						SLC2A3
						SLC39A6
						STC2
						STK32B
						TGFB3
						TMEM45B
						TSPYL5
						TYMS
						UBE2C
						UBE2T
						UCHL5
						WISP1
						ZNF533
						14 HKGs
						ACTB
						CALM2
						GAPDH
						GUSB
						HMBS
						MRPL19
						OAZ1
						PSMC4
						RPL37A
						RPLP0
						SDHA
						SF3A1
						TFRC
						UBC
						Total = 141

## Sheet: Codeset
2)	Custom designed codeset details.
	Customer Identifier	Accession	Target Region	Target Sequence
1	ACTB	NM_001101.2	1010-1110	TGCAGAAGGAGATCACTGCCCTGGCACCCAGCACAATGAAGATCAAGATCATTGCTCCTCCTGAGCGCAAGTACTCCGTGTGGATCGGCGGCTCCATCCT
2	ACTR3B	NM_020445.4	255-355	GCTCAAAGGAGAGTGTTGAGGGGAGTTGATGACCTTGACTTTTTCATAGGAGATGAAGCCATCGATAAACCTACATATGCTACAAAGTGGCCGATACGAC
3	AKAP2	NM_001004065.4	4956-5056	CCTTTAAAACTGCCAAGGGAGCTCTAACTTGAAGCCACATCCTACAGATGGCAGCCCAAATAGCACATGGGCAATTGGCACCATCTTTATATGGTTGAGT
4	ALDH4A1	NM_003748.3	505-605	ACGTGCAGTACCAAGTGTCGCCTTTTAACCATGGACATAAGGTGGCCAAGTTCTGTTATGCAGACAAGAGCCTGCTCAACAAAGCCATTGAGGCTGCCCT
5	ANLN	NM_018685.2	1900-2000	ATGACCTCTTCAGTGATGTCCTAGAGGAAGGTGAACTAGATATGGAGAAGAGCCAAGAGGAGATGGATCAAGCATTAGCAGAAAGCAGCGAAGAACAGGA
6	AP2B1	NM_001282.2	4530-4630	AGCAGTGTTACACTGTTTGATCTGCGGGCACTTGTTGCATTGCCTGGCACCCAATATTCAGGGTCCATGACTAAGACTGGTCTTCTCAGATGCCCTGCTT
7	AURKA	NM_003600.2	405-505	AGCTCCAGTTGGAGGTCCAAAACGTGTTCTCGTGACTCAGCAATTTCCTTGTCAGAATCCATTACCTGTAAATAGTGGCCAGGCTCAGCGGGTCTTGTGT
8	AYTL2	NM_024830.3	1831-1931	GTCTTCAGCCCGAGTTCCAGGGGCCTCGGGGGCTGTTTGTATCTTGTTCCTTTGTGAAGTGTGTTGCAGAACCGACGCTTACTGTGCGAGAATCGGAGGG
9	AZGP1	NM_001185.2	123-223	GTTACTCTCTGACCTATATCTACACTGGGCTGTCCAAGCATGTTGAAGACGTCCCCGCGTTTCAGGCCCTTGGCTCACTCAATGACCTCCAGTTCTTTAG
10	BAG1	NM_004323.3	1490-1590	CTCTTGTGATCGTGTAGTCCCATAGCTGTAAAACCAGAATCACCAGGAGGTTGCACCTAGTCAGGAATATTGGGAATGGCCTAGAACAAGGTGTTTGGCA
11	BBC3	NM_014417.2	1095-1195	GCTGATGGACTCAGCATCGGAAGGTGGCGGTGACCGAGGGGGTGGGGACTGAGCCGCCCGCCTCTGCCGCCCACCACCATCTCAGGAAAGGCTGTTGTGC
12	BCL2	NM_000657.2	5-105	GTGAAGCAGAAGTCTGGGAATCGATCTGGAAATCCTCCTAATTTTTACTCCCTCTCCCCGCGACTCCTGATTCATTGGGAAGTTTCAAATCAGCTATAAC
13	BIRC5	NM_001168.2	1215-1315	CCATTCTAAGTCATTGGGGAAACGGGGTGAACTTCAGGTGGATGAGGAGACAGAATAGAGTGATAGGAAGCGTCTGGCAGATACTCCTTTTGCCACTGCT
14	BLVRA	NM_000712.3	925-1025	CCTGGGGCTTGCAGAAGAAATCCAGAAATATTGCTGTTCAAGGAAGTAAGAGGAGGAGGTGATGTAGCACTTCCAAGATGGCACCAGCATTTGGTTCTTC
15	BUB1B	NM_001211.4	835-935	GAGTCTTCTGTACCACAACGAAGCACACTAGCTGAACTAAAGAGCAAAGGGAAAAAGACAGCAAGAGCTCCAATCATCCGTGTAGGAGGTGCTCTCAAGG
16	C16orf61	NM_020188.3	531-631	CCTTTGAATGGAAAGTGACCTGTGAGAGATTGAACCATGGAGAAATATGAAAACCCTGGATTCTGAGTATTTGTTGGGCAGGGCGTTTAGTACTGTCTCC
17	C20orf46	NM_018354.1	40-140	TGAATGGTGGGCGGGAGCAGCTATGTCAGTTGGTGTGTTTCTGCTTATGTTAGGGTAATTGGGCACGGCCTTTGTGTAACTGGTGAATATCTCTGAACCT
18	C9orf30	NM_080655.1	905-1005	GTGGCTCTCTTGTAATTAATCTGTGTTGGCAAAGAATGTCTGGAACATGGACTTGGCGGTCAGTAACCTGTAACAGAGCTACAACTAGGAAAATTAGAGT
19	CALM2	NM_001743.3	868-968	TGGAGTTGTAACTCTGCGTGGACTATGGACAGTCAACAATATGTACTTAAAAGTTGCACTATTGCAAAACGGGTGTATTATCCAGGTACTCGTACACTAT
20	CCNB1	NM_031966.2	715-815	AACTTGAGGAAGAGCAAGCAGTCAGACCAAAATACCTACTGGGTCGGGAAGTCACTGGAAACATGAGAGCCATCCTAATTGACTGGCTAGTACAGGTTCA
21	CCNE1	NM_001238.1	1635-1735	CCTCCAGACACCAGTGCGTGCTCCCGATGCTGCTATGGAAGGTGCTACTTGACCTAAGGGACTCCCACAACAACAAAAGCTTGAAGCTGTGGAGGGCCAC
22	CCNE2	NM_057735.1	50-150	CGCCAGCTGAGCCGAGCGGTAGCTGGTCTGGCGAGGTTTTATACACCTGAAAGAAGAGAATGTCAAGACGAAGTAGCCGTTTACAAGCTAAGCAGCAGCC
23	CD68	NM_001251.2	1140-1240	ACCGGTCCATCTTGCTGCCTCTCATCATCGGCCTGATCCTTCTTGGCCTCCTCGCCCTGGTGCTTATTGCTTTCTGCATCATCCGGAGACGCCCATCCGC
24	CDC20	NM_001255.2	430-530	GGAACATCAGAAAGCCTGGGCTTTGAACCTGAACGGTTTTGATGTAGAGGAAGCCAAGATCCTTCGGCTCAGTGGAAAACCACAAAATGCGCCAGAGGGT
25	CDC42BPA	NM_003607.2	7220-7320	GGTGTCTGTCCCAGGGCTGGAGATGCTTCCCAAGGAGGAGTCTGTTTTGTTGAGAGTGGGCGTGGGCTTCTTCACATAAGCCTGGGGAAGGAAGAAAAAA
26	CDC6	NM_001254.3	1300-1400	GAGATCAGGTTCTGGACAATGCTGCAGTTCAATTCTGTGCCCGCAAAGTCTCTGCTGTTTCAGGAGATGTTCGCAAAGCACTGGATGTTTGCAGGAGAGC
27	CDCA1	NM_145697.2	14-114	GACTTCCAGTAGGAGGCGGCAAGTTTGAAAAGTGATGACGGTTGACGTTTGCTGATTTTTGACTTTGCTTGTAGCTGCTCCCCGAACTCGCCGTCTTCCT
28	CDCA7	NM_031942.4	770-870	GAATTAGAAAGCTTCCCTGGCTCGTTCCGTGGAAGACATCCCCTCCCAGGCTCCGACTCACAATCAAGGAGACCGCGAAGGCGTACATTCCCGGGTGTTG
29	CDH3	NM_001793.4	3745-3845	GACAGGCTATGAGTCTGACGTTAGAGTGGTGGCTTCCTTAGCCTTTCAGGATGGAGGAATGTGGGCAGTTTGACTTCAGCACTGAAAACCTCTCCACCTG
30	CEGP1	NM_020974.1	1835-1935	CGTAAAGCCATCCGCACGCTCAGAAAGGCCGTCCACAGGGAGCAGTTTCACCTCCAGCTCTCAGGCATGAACCTCGACGTGGCTAAAAAGCCTCCCAGAA
31	CENPA	NM_001042426.1	979-1079	CACTTTGAGCAGTTGCCTGGAAGGCTGGGCATTTCCATCATATAGACCTCTGCCCTTCAGAGTAGCCTCACCATTAGTGGCAGCATCATGTAACTGAGTG
32	CENPF	NM_016343.3	5822-5922	AGATAATGTGGCCAAGGTGAATGACAGCTGGAAGGAGAGATTTCTTGATGTGGAAAATGAGCTGAGTAGGATCAGATCGGAGAAAGCTAGCATTGAGCAT
33	CEP55	NM_001127182.1	558-658	ACGTATTGAAACAACAGTTGTCTGCTGCAACCTCACGAATTGCTGAACTTGAAAGCAAAACCAATACACTCCGTTTATCACAGACTGTGGCTCCAAACTG
34	COL4A2	NM_001846.2	1150-1250	GGCATTTCCTTGAAGGGAGAAGAAGGAATCATGGGCTTTCCTGGACTGAGGGGTTACCCTGGCTTGAGTGGTGAAAAAGGATCACCAGGACAGAAGGGAA
35	CTSL2	NM_001333.3	2820-2920	GTGAAATTTAATCGAAAGGTGATCCATTGTGAATGCAATGGGAGGGAAGGGGCATGTGGGACTGTGTATCCCAAAAACCCTTTGATAGCCTATGTCCACA
36	CXXC5	NM_016463.7	1265-1365	CGGAACCCAAAGCTGCCCTCTCCGTGCAATGTCACTGCTCGTGTGGTCTCCAGCAAGGGATTCGGGCGAAGACAAACGGATGCACCCGTCTTTAGAACCA
37	DCK	NM_000788.2	310-410	GCTGCCCGTCTTTCTCAGCCAGCTCTGAGGGGACCCGCATCAAGAAAATCTCCATCGAAGGGAACATCGCTGCAGGGAAGTCAACATTTGTGAATATCCT
38	DHCR7	NM_001360.2	780-880	CCCACCATCATCTTCGACAACTGGATCCCACTGCTGTGGTGCGCCAACATCCTTGGCTATGCCGTCTCCACCTTCGCCATGGTCAAGGGCTACTTCTTCC
39	DIAPH3	NM_030932.3	2264-2364	AGTGCAAAAGAACAATATGAGACACTTTCGAAGTTACACGAAAACATGGAAAAGTTATACCAGAGTATAATAGGATACTATGCCATTGATGTGAAGAAGG
40	DTL	NM_016448.2	380-480	TACCCTCTTCAATCCCTTCTGACTGGTTATCAGTGCAGTGGTAATGATGAACACACTTCTTATGGAGAAACAGGAGTCCCAGTTCCTCCTTTTGGATGTA
41	EBF4	NM_001110514.1	1997-2097	AGTCTTTTGAGGATTCTGACAAGTTTCACTCTCCAGCCCGGGGGCTTCAGGGCCTGGCATACTCCTAATTACGGTCTGCAGCTGTTCCCATGGAGCCCGG
42	ECT2	NM_018098.4	1360-1460	CAGTTATTTCAAGTACCATTGGAAGAGGAAGGACAACGTGGTGGACCTATCCTTGCACCAGAGGAGATTAAGACTATTTTTGGTAGCATCCCAGATATCT
43	EGFR	NM_201282.1	360-460	ACGCAGTTGGGCACTTTTGAAGATCATTTTCTCAGCCTCCAGAGGATGTTCAATAACTGTGAGGTGGTCCTTGGGAATTTGGAAATTACCTATGTGCAGA
44	EGLN1	NM_022051.1	3975-4075	AGCAGCATGGACGACCTGATACGCCACTGTAACGGGAAGCTGGGCAGCTACAAAATCAATGGCCGGACGAAAGCCATGGT
45	ERBB2	NM_004448.2	2380-2480	CTGAAAGAGACGGAGCTGAGGAAGGTGAAGGTGCTTGGATCTGGCGCTTTTGGCACAGTCTACAAGGGCATCTGGATCCCTGATGGGGAGAATGTGAAAA
46	ESM1	NM_007036.4	1230-1330	CAATTTCAAAAGGCTGCTGATGTAGTTCCCGGGTTACCTGTATCTGAAGGACGGTTCTGGGGCATAGGAAACACATACACTTCCATAAATAGCTTTAACG
47	ESR1	NM_000125.2	2390-2490	TGCTATGTTACTAAGCGTGAGGATTCCCGTAGCTCTTCACAGCTGAACTCAGTCTATGGGTTGGGGCTCAGATAACTCTGTGCATTTAAGCTACTTGTAG
48	EXO1	NM_003686.3	2715-2815	GCCAGAGCCAGTGGGCTGAGCAAGAAGCCGGCAAGCATCCAGAAGAGAAAGCATCATAATGCCGAGAACAAGCCGGGGTTACAGATCAAACTCAATGAGC
49	EXT1	NM_000127.2	3150-3250	AAAAAAAAGGCCAATGAGAACTCAACTCCTGGCTCCTGGGACTGCACCAGACTGCTCCAAACTCACCTCACTGGCTTCTGTGTCCCAAGACTAGGTTGTG
50	FGF18	NM_003862.1	850-950	AATTCTACCTGTGCATGAACCGCAAAGGCAAGCTCGTGGGGAAGCCCGATGGCACCAGCAAGGAGTGTGTGTTCATCGAGAAGGTTCTGGAGAACAACTA
51	FGFR4	NM_002011.3	1585-1685	AGGCGAGGGCTGCTTTGGCCAGGTAGTACGTGCAGAGGCCTTTGGCATGGACCCTGCCCGGCCTGACCAAGCCAGCACTGTGGCCGTCAAGATGCTCAAA
52	FLT1	NM_001160031.1	1050-1150	ACTCCCTTGAACACGAGAGTTCAAATGACCTGGAGTTACCCTGATGAAAAAAATAAGAGAGCTTCCGTAAGGCGACGAATTGACCAAAGCAATTCCCATG
53	FOXA1	NM_004496.2	2465-2565	TGATACATTCTCAAGAGTTGCTTGACCGAAAGTTACAAGGACCCCAACCCCTTTGTCCTCTCTACCCACAGATGGCCCTGGGAATCAATTCCTCAGGAAT
54	FOXC1	NM_001453.1	1515-1615	TCGGTGCGGGAGATGTTCGAGTCACAGAGGATCGGCTTGAACAACTCTCCAGTGAACGGGAATAGTAGCTGTCAAATGGCCTTCCCTTCCAGCCAGTCTC
55	GAPDH	NM_002046.3	35-135	TCCTCCTGTTCGACAGTCAGCCGCATCTTCTTTTGCGTCGCCAGCCGAGCCACATCGCTCAGACACCATGGGGAAGGTGAAGGTCGGAGTCAACGGATTT
56	GMPS	NM_003875.2	385-485	TAAGGATGGCCACCACCACTATGAAGGAGCTGTTGTCATTCTGGATGCTGGTGCTCAGTACGGGAAAGTCATAGACCGAAGAGTGAGGGAACTGTTCGTG
57	GNAZ	NM_002073.2	205-305	ACGGCAGCAGCCGAGGCAAACACAAGCGGACGGCTTCCCACCGTCGCCGAGGACAGGGAATGACTACGGCAAATCAGGCCACTTTGCCAACTAGGGAGGT
58	GPR126	NM_001032394.1	1675-1775	CAGTTTTCACCTGAGTGCTGGAGAGGACAAGATTAAAGTCAAGAGAAGCCTTGAGGATGAGCCAAGGTTGGTGCTTTGGGCCCTTCTAGTTTACAATGCT
59	GPR160	NM_014373.1	760-860	GGATTTCAGTCCTTGCTTATGTTTTGGGAGACCCAGCCATCTACCAAAGCCTGAAGGCACAGAATGCTTATTCTCGTCACTGTCCTTTCTATGTCAGCAT
60	GPR180	NM_180989.4	1025-1125	TTCACACCACAACTTAGCAGGGATCCTCCTAATTGTTCTAAGAATTTGCCTAGCATTGTCATTAGGCTGTGGACTCTATCAGATCATCACAGTGGAGAGA
61	GRB7	NM_005310.2	905-1005	TCATCCAGAACTTCCTGAATGCTGGCAGCTTTCCTGAGATCCAGGGCTTTCTGCAGCTGCGGGGTTCAGGACGGAAGCTTTGGAAACGCTTTTTCTGCTT
62	GSTM1	NM_000561.2	335-435	GATTCGTGTGGACATTTTGGAGAACCAGACCATGGACAACCATATGCAGCTGGGCATGATCTGCTACAATCCAGAATTTGAGAAACTGAAGCCAAAGTAC
63	GSTM3	NM_000849.3	1025-1125	GTTCAAGGGCTGTAGGTTCATGCCCAAGCCCTGAGAGTGGGTACTAGAAAAAACGAGATTGCACAGTTGGAGAGAGCAGGTGTGTTAAATGGGACTGGAG
64	GUSB	NM_000181.1	1350-1450	CGGTCGTGATGTGGTCTGTGGCCAACGAGCCTGCGTCCCACCTAGAATCTGCTGGCTACTACTTGAAGATGGTGATCGCTCACACCAAATCCTTGGACCC
65	HMBS	NM_000190.3	315-415	CATTGCTATGTCCACCACAGGGGACAAGATTCTTGATACTGCACTCTCTAAGATTGGAGAGAAAAGCCTGTTTACCAAGGAGCTTGAACATGCCCTGGAG
66	HOXB13	NM_006361.5	1220-1320	CCACCAGGGTTCCCAAAGAACCTGGCCCAGTCATAATCATTCATCCTGACAGTGGCAATAATCACGATAACCAGTACTAGCTGCCATGATCGTTAGCCTC
67	HRASLS	NM_020386.3	795-895	GGAGTTTCAGAGCAGGCCAACCGAGCGATAAGTACCGTTGAGTTTGTGACAGCTGCTGTTGGTGTCTTCTCATTCCTGGGCTTGTTTCCAAAAGGACAAA
68	IGFBP5	NM_000599.3	3320-3420	AATGGGTTGCAAAATAGAAATGAGCTTAATCCAGGCCGCAGAGCCAGGGAAGGTGAGTAACTTTAGGAGGGTGCTAGACTTTAGAAGCCAGATAGGAAGA
69	IL17R	NM_014339.4	3020-3120	CTACTATGTGGCGGGCATTTGGGATACCAAGATAAATTGCATGCGGCATGGCCCCAGCCATGAAGGAACTTAACCGCTAGTGCCGAGGACACGTTAAACG
70	IL6ST	NM_002184.2	2505-2605	CAAAACACTTCGAGCACTGTCCAGTATTCTACCGTGGTACACAGTGGCTACAGACACCAAGTTCCGTCAGTCCAAGTCTTCTCAAGATCCGAGTCTACCC
71	JHDM1D	NM_030647.1	6155-6255	GTAATTAATATGGTCATACAGGGACTTGGTGTAGCATGCAAGGAAGCAGAAGACCTGGGCTTTTGTCGAAGTTCTGCCATTTAGGTATCAGCTGTGTAAC
72	KIF2C	NM_006845.3	1940-2040	CCTGCTCTAACGGGGCGCTGATTCCAGGCAATTTATCCAAGGAAGAGGAGGAACTGTCTTCCCAGATGTCCAGCTTTAACGAAGCCATGACTCAGATCAG
73	KNTC2	NM_006101.2	96-196	CGCTGTCCTGTCTAGCAGATACTTGCACGGTTTACAGAAATTCGGTCCCTGGGTCGTGTCAGGAAACTGGAAAAAAGGTCATAAGCATGAAGCGCAGTTC
74	KRT14	NM_000526.4	523-623	CGGCCTGCTGAGATCAAAGACTACAGTCCCTACTTCAAGACCATTGAGGACCTGAGGAACAAGATTCTCACAGCCACAGTGGACAATGCCAATGTCCTTC
75	KRT17	NM_000422.2	514-614	AGCCAGTACTACAGGACAATTGAGGAGCTGCAGAACAAGATCCTCACAGCCACCGTGGACAATGCCAACATCCTGCTACAGATTGACAATGCCCGTCTGG
76	KRT5	NM_000424.2	130-230	CTGGTTCTCTTGCTCCACCAGGAACAAGCCACCATGTCTCGCCAGTCAAGTGTGTCCTTCCGGAGCGGGGGCAGTCGTAGCTTCAGCACCGCCTCTGCCA
77	LGP2	NM_024119.2	1225-1325	AAGAATGAGCTGGCCCACTTGGCAACTCATGGCCCAGAGAATCCAAAACTGGAGATGCTGGAAAAGATCCTGCAAAGGCAGTTCAGTAGCTCTAACAGCC
78	LIN9	NM_173083.2	1890-1990	GAATAATGTAGAAATCCATGTTGCACATATTCAGAGTGGCCTGAGCCAGATGGGAAACTTACATGCCTTTGCAGCAAATAACACCAACAGAGACTGAGTA
79	LOC100131053	XM_001722493.1	383-483	ATGCTTGTCTCCAGGTGTGGCCTGAAGGGAAAAGTGTGGACAGTTTGGTGTGATCAAGGAAATGGAACCACGCTTACCAGTTGCCCTTGTCCAGGAAGGG
80	LOC100288906	XM_002342866.1	856-956	GTGGCGTACTGCGCATTTGATTCTGGTTGACTTGGGATACCTGAGCTCGGCTCTCATTAGCTCTTCCGCTCGACCCACAATCCCTAGTGTTTGCAGGTGT
81	MAPT	NM_016834.3	1205-1305	ATTGGGTCCCTGGACAATATCACCCACGTCCCTGGCGGAGGAAATAAAAAGATTGAAACCCACAAGCTGACCTTCCGCGAGAACGCCAAAGCCAAGACAG
82	MCM6	NM_005915.4	515-615	TTCACCCAGAGCTTGTGAGCGGAACTTTTCTGTGCTTGGACTGTCAGACAGTGATCAGGGATGTAGAACAGCAGTTCAAATACACACAGCCAAACATCTG
83	MDM2	NM_002392.2	601-701	GATCTACAGGAACTTGGTAGTAGTCAATCAGCAGGAATCATCGGACTCAGGTACATCTGTGAGTGAGAACAGGTGTCACCTTGAAGGTGGGAGTGATCAA
84	MELK	NM_014791.2	365-465	AGAGACAGCCAACAAAATATTCATGGTTCTTGAGTACTGCCCTGGAGGAGAGCTGTTTGACTATATAATTTCCCAGGATCGCCTGTCAGAAGAGGAGACC
85	MGP	NM_000900.2	305-405	TCAATAGGGAAGCCTGTGATGACTACAGACTTTGCGAACGCTACGCCATGGTTTATGGATACAATGCTGCCTATAATCGCTACTTCAGGAAGCGCCGAGG
86	MIA	NM_006533.2	116-216	CCCCTTGCTCACTCTCTTGCTCACAGTCCACGATGGCCCGGTCCCTGGTGTGCCTTGGTGTCATCATCTTGCTGTCTGCCTTCTCCGGACCTGGTGTCAG
87	MKI67	NM_002417.2	4020-4120	AGCAGATGTAGAGGGAGAACTCTTAGCGTGCAGGAATCTAATGCCATCAGCAGGCAAAGCCATGCACACGCCTAAACCATCAGTAGGTGAAGAGAAAGAC
88	MLPH	NM_024101.5	2950-3050	CCTAGTATCGGTGTGCCCCATCCAGTTTTAAGTGGAGCCCTCCAAGACTCTCCAGAGCTGCCTTTGAACATCCTAACAGTAATCACATCTCACCCTCCCT
89	MMP11	NM_005940.3	260-360	GTGGCGTGCCCGACCCATCTGATGGGCTGAGTGCCCGCAACCGACAGAAGAGGTTCGTGCTTTCTGGCGGGCGCTGGGAGAAGACGGACCTCACCTACAG
90	MMP9	NM_004994.2	1530-1630	CACTACTGTGCCTTTGAGTCCGGTGGACGATGCCTGCAACGTGAACATCTTCGACGCCATCGCGGAGATTGGGAACCAGCTGTATTTGTTCAAGGATGGG
91	MRPL19	NM_014763.3	364-464	GGAAGTATTCTTCGTGTTACTACAGCTGACCCATATGCCAGTGGAAAAATCAGCCAGTTTCTGGGGATTTGCATTCAGAGATCAGGAAGAGGACTTGGAG
92	MS4A7	NM_206939.1	716-816	TCACTGTGCTGGAGCTCTTATTAGCTGCATACAGTTCTGTCTTTTGGTGGAAACAGCTCTACTCCAACAACCCTGGGAGTTCATTTTCCTCGACCCAGTC
93	MTDH	NM_178812.2	1375-1475	GGGTCTACTGCTGAGCCAGTTTCTCAGTCTACCACTTCTGATTATCAGTGGGATGTTAGCCGTAATCAACCCTATATCGATGATGAATGGTCTGGGTTAA
94	MYBL2	NM_002466.2	445-545	GAATCCAGACCTTGTCAAGGGGCCATGGACCAAAGAGGAAGACCAAAAAGTCATCGAGCTGGTTAAGAAGTATGGCACAAAGCAGTGGACACTGATTGCC
95	MYC	NM_002467.3	1610-1710	TCGGACACCGAGGAGAATGTCAAGAGGCGAACACACAACGTCTTGGAGCGCCAGAGGAGGAACGAGCTAAAACGGAGCTTTTTTGCCCTGCGTGACCAGA
96	NAT1	NM_000662.5	1589-1689	TGAAATCCTGTGGACACTGGGCGAATTACTTTTTAGATCTGTAGCTCTGACTCCTCAGGCATAAAATGGGAATAATGCTTTTACAGTTTAGTGGCGGAAC
97	NEK2	NM_002497.3	480-580	AGAGTTTGTTCTTCGAGTGATGACTCAGTTGACTCTGGCCCTGAAGGAATGCCACAGACGAAGTGATGGTGGTCATACCGTATTGCATCGGGATCTGAAA
98	NMU	NM_006681.2	320-420	CTCAGGCATCCAACGCACTGGAGGAGCTTTGCTTTATGATTATGGGAATGCTACCAAAGCCTCAGGAACAAGATGAAAAAGATAATACTAAAAGGTTCTT
99	NUSAP1	NM_018454.6	1035-1135	TCAAGCGCTCTGCTATCTCTGCAGCTAAAACGGGTGTCAGGTTTTCAGCTGCTACTAAAGATAATGAGCATAAGCGTTCACTGACCAAGACTCCAGCCAG
100	OAZ1	NM_004152.2	313-413	GGTGGGCGAGGGAATAGTCAGAGGGATCACAATCTTTCAGCTAACTTATTCTACTCCGATGATCGGCTGAATGTAACAGAGGAACTAACGTCCAACGACA
101	ORC6L	NM_014321.2	582-682	CTGTGTAAACAACTAGAGAAGATTGGACAGCAGGTCGACAGAGAACCTGGAGATGTAGCTACTCCACCACGGAAGAGAAAGAAGATAGTGGTTGAAGCCC
102	OXCT1	NM_000436.3	430-530	ACCAGTGCTCATCGCCATACCAAGTTTTATACAGATCCAGTAGAAGCTGTAAAAGACATCCCTGATGGTGCCACGGTTTTGGTTGGTGGTTTTGGGCTAT
103	PALM2	NM_001037293.1	3890-3990	GGGAATTCAGGCTTAGCCAGTACTTCTATGGGATGAGACCTATAATCCCACCTATAGCAGCAAGTAACTACCCTTCATGATGATAGTGTACATGGAGCTG
104	PECI	NM_006117.2	940-1040	AGTTAACAGCGGGAGAGGCATGTGCTCAAGGACTTGTTACTGAAGTTTTCCCTGATAGCACTTTTCAGAAAGAAGTCTGGACCAGGCTGAAGGCATTTGC
105	PGR	NM_000926.4	2720-2820	GTGGGCGTTCCAAATGAAAGCCAAGCCCTAAGCCAGAGATTCACTTTTTCACCAGGTCAAGACATACAGTTGATTCCACCACTGATCAACCTGTTAATGA
106	PHGDH	NM_006623.3	1900-2000	GAAAATCCACATTCTTGGGCTGAACGCGGGCCTCTGACACTGCTTACACTGCACTCTGACCCTGTAGTACAGCAATAACCGTCTAATAAAGAGCCTACCC
107	PITRM1	NM_014889.2	2660-2760	CTACACGGACCCAGATCATGCCAGTCTTAAAATCCTTGCACGTTTGATGACTGCCAAATTCTTGCATACAGAAATTCGAGAAAAAGGCGGTGCTTATGGT
108	PRC1	NM_003981.2	2045-2145	TGGCTTCCTGTGCCTAGACTGGACCTAATTATATGGGGGTGACTTTAGTTTTTCTTCAGCTTAGGCGTGCTTGAAACCTTGGCCAGGTTCCATGACCATG
109	PSMC4	NM_006503.2	250-350	TTTCTCCATGCCCAGGAGGAGGTGAAGCGAATCCAAAGCATCCCGCTGGTCATCGGACAATTTCTGGAGGCTGTGGATCAGAATACAGCCATCGTGGGCT
110	PTTG1	NM_004219.2	542-642	TGTGAAGATGCCCTCTCCACCATGGGAATCCAATCTGTTGCAGTCTCCTTCAAGCATTCTGTCGACCCTGGATGTTGAATTGCCACCTGTTTGCTGTGAC
111	QSCN6L1	NM_181701.3	1265-1365	ACTAATCACATAAAGTGGGTTGGATGTCAAGGAAGCCGATCTGAGTTGAGGGGTTACCCGTGTTCTCTCTGGAAACTGTTCCACACTTTGACTGTTGAAG
112	RAB6B	NM_016577.3	4190-4290	ACATACATCAACATGAAGGTGTGACATCAGAATCATGAGCACCATGGCTGCAGTTGTGTGATCCAAGGCTAGTTGGCTTGGTAGCTGTTGGCAGCAGTTT
113	RACGAP1	NM_013277.3	9-109	CTCTGTGATTGGTTGGTGAAGGTTTTCAAACCGGAGCTGTGGGCGCGGCGCTGCTCTGCCGTTGGGTGAGGCGCGGAGCGAAGTGAAGGGTGGCCCAGGT
114	RASSF7	NM_003475.3	117-217	CCACCTGCCAGGAAGTGGTCATCGCACTAGCCCAAGCAATAGGCCAGACTGGCCGCTTTGTGCTTGTGCAGCGGCTTCGGGAGAAGGAGCGGCAGTTGCT
115	RBBP8	NM_203291.1	1541-1641	AATCCCTAGGTGAACAGAATAGGACTGAGTACGGTAAAGATTCTAACACTGATAAACATTTGGAGCCCCTGAAATCATTGGGAGGCCGAACATCCAAAAG
116	RECQL5	NM_004259.4	180-280	CTTTCCTTTTGACCCTGAGCGGCGAGTCCGGAGTACGCTGAAGAAGGTCTTTGGGTTTGACTCTTTTAAGACGCCTTTACAGGAGAGTGCGACCATGGCT
117	RFC4	NM_181573.2	1035-1135	ACAGGTGGAAAGGAGATCACAGAGAAAGTGATTACAGACATTGCCGGGGTAATACCAGCTGAGAAAATTGATGGAGTATTTGCTGCCTGTCAGAGTGGCT
118	RPL37A	NM_000998.4	298-398	CTTCCGCTGTCACGGTAAAGTCCGCCATCAGAAGACTGAAGGAGTTGAAAGACCAGTAGACGCTCCTCTACTCTTTGAGACATCACTGGCCTATAATAAA
119	RPLP0	NM_001002.3	250-350	CGAAATGTTTCATTGTGGGAGCAGACAATGTGGGCTCCAAGCAGATGCAGCAGATCCGCATGTCCCTTCGCGGGAAGGCTGTGGTGCTGATGGGCAAGAA
120	RRM2	NM_001034.1	1615-1715	AGGGGTGACCCTTTAGTGAGCTTAGCACAGCGGGATTAAACAGTCCTTTAACCAGCACAGCCAGTTAAAAGATGCAGCCTCACTGCTTCAACGCAGATTT
121	RTN4RL1	NM_178568.2	2355-2455	AGGGGGAGGCAGCAAGAGTCACTTTGGGGGACCAATATTCTTAGATATTTAGAGCATCACCTTGTTTTTATATGCAACACAAGCCTGTCTGCCACCCTGG
122	RUNDC1	NM_173079.2	3010-3110	CACGGCACAGACAATGGGCTTTCTGTTTATGAGGGGTGAGAAGTGATGTTTGTTACTATGTTCTCCAGCAAGTAAACATTCCTCTGCTCACCTCCCAACA
123	SDHA	NM_004168.1	230-330	TGGAGGGGCAGGCTTGCGAGCTGCATTTGGCCTTTCTGAGGCAGGGTTTAATACAGCATGTGTTACCAAGCTGTTTCCTACCAGGTCACACACTGTTGCA
124	SERF1A	NM_021967.2	139-239	ATCCCAGAGTGCCAGAGAACCGTTGCTTTTCCGAGTTGCTCTTCTTCCAGGCTCCGTTGGTGGTCGGCATGGCCCGTGGAAATCAACGAGAACTTGCCCG
125	SF3A1	NM_001005409.1	235-335	CTTCTAAGCCAGTTGTGGGGATTATTTACCCTCCTCCAGAGGTCAGAAATATTGTTGACAAGACTGCCAGCTTTGTGGCCAGAAACGGGCCTGAATTTGA
126	SFRP1	NM_003012.3	3320-3420	CAGAGTCCTTAGTGGAGGGGTTTACCTGGAACATTAGTAGTTACCACAGAATACGGAAGAGCAGGTGACTGTGCTGTGCAGCTCTCTAAATGGGAATTCT
127	SLC2A3	NM_006931.2	35-135	GGCTGGGGGCTTGTCGCCCTTTCAGGCTCCACCCTTTGCGGAGATTATAAATAGTCATGATCCCAGCGAGACCCAGAGATGCTGTAATGGTAAGACTTTG
128	SLC39A6	NM_012319.3	1070-1170	CCTCAGGAGTGTTTCAATGCATCAAAGCTACTGACATCTCATGGCATGGGCATCCAGGTTCCGCTGAATGCAACAGAGTTCAACTATCTCTGTCCAGCCA
129	STC2	NM_003714.2	2825-2925	ATTTCTATGTGTAATTTCTGAGCCATTGTACTGTCTGGGCTGGGGGGGACACTGTCCAAGGGAGTGGCCCCTATGAGTTTATATTTTAACCACTGCTTCA
130	STK32B	NM_018401.1	925-1025	TGGGACGCGGTGTTCAAGAAGGCACTGATGCCCGGCTTTGTGCCCAATAAAGGGAGGTTGAACTGCGATCCCACATTTGAGCTTGAAGAGATGATTCTAG
131	TFRC	NM_003234.1	1220-1320	CAGTTTCCACCATCTCGGTCATCAGGATTGCCTAATATACCTGTCCAGACAATCTCCAGAGCTGCTGCAGAAAAGCTGTTTGGGAATATGGAAGGAGACT
132	TGFB3	NM_003239.2	2825-2925	CCCTCGATCATATTTCCCCTTGGACACTTGGTTAGACGCCTTCCAGGTCAGGATGCACATTTCTGGATTGTGGTTCCATGCAGCCTTGGGGCATTATGGG
133	TMEM45B	NM_138788.3	2075-2175	CAACAGCACTGAAATGGCTGTAAGGACTCCTGAGATATGTGTCCAGCAAGGAGTTTACAGTCAAACAGGAGAGACATGCCTGTAGTTACATCCAGTGTGA
134	TSPYL5	NM_033512.2	2000-2100	TGCCATGTGTTCTGTACCATCATGTGTCTCTTCTTGCTTCTGGGCCCTTCTACTGGTGAACTTTCATCAAGATCTGCGCCATGCCGTGTCACTATCAAGC
135	TYMS	NM_001071.1	555-655	TCAGATTATTCAGGACAGGGAGTTGACCAACTGCAAAGAGTGATTGACACCATCAAAACCAACCCTGACGACAGAAGAATCATCATGTGCGCTTGGAATC
136	UBC	NM_021009.3	1875-1975	TGCAGATCTTCGTGAAGACCCTGACTGGTAAGACCATCACTCTCGAAGTGGAGCCGAGTGACACCATTGAGAATGTCAAGGCAAAGATCCAAGACAAGGA
137	UBE2C	NM_181803.1	269-369	CTTTTAAGAAGTACCTGCAAGAAACCTACTCAAAGCAGGTCACCAGCCAGGAGCCCTGACCCAGGCTGCCCAGCCTGTCCTTGTGTCGTCTTTTTAATTT
138	UBE2T	NM_014176.3	595-695	AAACAAAAGGCTGATGAGGAAGAGATGCTTGATAATCTACCAGAGGCTGGTGACTCCAGAGTACACAACTCAACACAGAAAAGGAAGGCCAGTCAGCTAG
139	UCHL5	NM_015984.2	317-417	GAACCAGCAGGCTCTGTGGTTCAGGACTCCCGACTTGACACGATATTTTTTGCTAAGCAGGTAATTAATAATGCTTGTGCTACTCAAGCCATAGTGAGTG
140	WISP1	NM_080838.1	850-950	TGTAGGAATCCCAATGACATCTTTGCTGACTTGGAATCCTACCCTGACTTCTCAGAAATTGCCAACTAGGCAGGCACAAATCTTGGGTCTTGGGGACTAA
141	ZNF533	NM_001113398.1	595-695	CTGACAAATCAGAAGATAAAGGGAAGTTAAAAGCCAGCAGTTCCAGTCAGCCATCAAGCTCTGAAAGTGGCTCATTTCTCCTCAAATCTGGCACAACACC

## Sheet: NanoString counts (Raw)
3)	Nanostring counts for 127 GEP genes, 14 housekeeping genes, 6 positive controls, and 8 negative controls.
Gene Name	2_core	2_section	3_PR	3_core	3_section	5_Ki67	5_PR	5_core	5_section	6_core	6_section	7_core	7_section	8_Ki67	8_core	8_section	9_Ki67	9_core	9_section	10_core	10_section	12_Ki67	12_core	12_section	13_core	13_section	14_core	14_section	15_Ki67	15_core	15_section	16_core	16_section	18_Ki67	18_core	18_section	19_Ki67	19_core	19_section	20_core	20_section	21_core	21_section	22_Ki67	22_core	22_section	23_core	23_section	24_core
ACTB	10619	7321	10247	13241	16374	24646	11932	24389	15524	21019	9604	10504	13292	15064	12424	14477	15665	18213	13984	16286	8773	27151	42229	31310	19111	13591	25366	39208	21140	19357	22366	19360	25315	14566	15498	12943	40703	47144	41012	23683	21152	38022	32070	30225	33664	24382	25702	41966	20532
ACTR3B	125	97	162	187	189	156	117	226	138	104	74	93	103	183	113	142	147	190	102	166	70	133	228	145	122	97	128	177	306	296	300	222	259	167	187	128	229	205	181	296	195	148	167	277	190	134	184	299	295
AKAP2	73	101	178	204	303	433	145	250	184	259	173	96	167	193	106	149	109	98	105	100	116	161	219	268	168	193	165	523	348	85	264	159	258	204	151	181	162	161	283	220	450	172	199	151	219	215	138	334	184
ALDH4A1	61	35	53	51	73	113	139	266	117	72	51	89	166	89	57	75	63	77	43	113	53	196	274	227	56	74	110	244	123	53	90	132	214	193	235	149	85	97	137	141	112	171	131	160	129	101	174	316	168
ANLN	99	31	89	131	140	84	54	109	68	44	26	46	62	76	59	93	43	37	23	38	18	188	209	146	48	36	98	110	103	35	63	50	75	120	95	79	257	219	206	56	40	66	58	131	80	88	54	86	109
AP2B1	505	302	679	958	940	832	567	1281	588	876	476	497	552	632	496	670	899	917	591	807	382	2053	2790	1921	648	440	871	1150	1571	1162	1261	301	587	408	450	304	1181	774	941	1364	984	1182	1244	848	742	643	1417	1614	678
AURKA	93	50	157	133	165	112	120	131	90	77	63	108	108	177	115	170	74	74	53	74	63	210	266	141	111	75	84	119	126	72	96	97	109	97	117	76	203	204	177	66	91	138	108	105	91	68	75	95	216
AYTL2	192	114	211	277	301	313	145	281	165	328	156	206	249	271	231	272	251	276	179	202	115	610	878	618	246	151	178	296	375	128	260	392	444	255	310	204	656	508	596	200	339	306	294	313	383	261	188	333	272
AZGP1	2940	2037	6636	21291	18044	1836	1723	4217	2352	3140	2889	2232	4089	3286	2308	3596	1676	1831	1246	1383	1302	4765	8586	6107	4465	4188	7948	6297	1404	7326	5067	18330	14578	1919	4043	2962	7763	7669	7087	10853	9037	13743	9867	18864	5073	6578	9833	11490	12215
BAG1	89	72	195	423	367	197	130	282	132	155	137	108	162	191	138	204	62	72	52	187	77	280	403	293	106	76	226	204	221	224	250	183	205	114	145	99	114	95	152	95	125	174	168	129	80	87	100	128	279
BBC3	72	65	83	62	90	80	74	88	89	277	66	93	86	71	41	102	86	77	56	69	45	83	176	91	71	71	169	188	91	80	91	47	62	66	136	75	94	102	102	123	95	167	147	105	86	110	75	138	117
BCL2	193	153	374	533	550	353	246	564	281	159	149	505	479	327	236	252	389	274	237	340	151	550	834	504	360	302	344	542	397	558	464	264	359	164	208	138	291	220	307	771	507	834	808	714	499	382	736	749	936
BIRC5	182	66	431	631	635	80	98	162	84	72	38	92	114	228	163	182	112	83	70	97	36	645	712	591	114	87	180	210	342	116	172	164	242	348	441	318	386	376	311	116	96	249	170	373	175	190	105	142	579
BLVRA	362	224	771	1620	1373	635	476	1010	415	234	188	688	711	518	413	565	216	223	188	424	176	1118	1831	1085	292	226	1109	1457	915	678	661	900	991	377	470	352	2270	2143	1800	590	614	1094	780	902	597	494	606	716	523
BUB1B	55	24	122	163	167	50	42	132	52	35	23	28	60	105	63	77	45	54	26	49	30	284	254	223	77	38	85	137	155	89	89	52	81	78	116	82	165	178	133	66	51	124	79	170	89	100	62	81	126
C16orf61	177	109	225	290	288	382	169	376	215	259	146	344	350	369	305	300	231	209	129	280	178	558	831	516	300	216	240	383	397	184	290	320	395	330	359	251	1009	958	903	286	288	557	491	343	329	278	248	432	374
C20orf46	16	17	49	19	49	78	31	40	30	19	18	23	21	33	22	37	18	17	20	18	16	52	89	55	35	27	35	37	40	13	41	13	27	41	35	30	25	31	38	33	39	24	29	26	16	27	21	41	34
C9orf30	211	151	197	186	224	350	249	379	215	493	225	163	158	184	128	198	224	243	162	267	163	283	559	327	292	204	294	380	458	93	287	248	266	158	198	155	503	498	470	322	344	272	288	298	382	251	295	445	263
CALM2	3086	1442	2359	3524	3055	8020	6392	14271	5584	4231	2087	1991	2613	3809	3048	2958	2721	2834	1772	3225	1402	4331	7088	4309	3136	1929	3602	4959	3432	7178	4508	6378	6265	3150	3392	2510	6850	6794	5748	7590	4795	7940	6238	6863	5135	3704	5806	6427	4519
CCNB1	258	101	397	560	509	196	182	418	179	98	70	142	201	477	348	372	202	166	109	110	35	626	720	488	190	112	306	372	190	106	150	189	283	304	345	241	929	739	677	199	123	401	292	638	284	274	169	249	449
CCNE1	28	9	56	57	60	38	33	51	32	23	11	28	35	35	36	37	31	23	23	23	17	109	128	88	51	24	36	41	54	31	34	36	56	44	35	42	85	106	87	28	33	45	51	38	47	27	41	52	75
CCNE2	97	67	136	208	190	85	127	121	116	114	48	99	104	146	121	136	65	65	55	84	63	222	306	170	128	90	128	81	139	103	104	72	106	122	168	97	150	178	154	62	87	124	108	123	63	60	108	148	98
CD68	139	109	318	374	551	634	263	597	272	435	236	364	614	299	363	380	245	207	217	189	176	841	907	898	945	375	393	1822	397	266	429	450	680	504	458	357	609	763	797	713	871	675	755	541	574	531	291	968	498
CDC20	204	95	289	302	298	142	179	227	126	94	83	144	181	335	204	289	72	61	57	110	74	400	506	377	132	102	153	138	147	76	106	160	249	153	196	117	426	491	407	123	109	260	175	263	157	151	88	141	364
CDC42BPA	214	202	204	216	263	544	260	543	341	427	302	145	170	159	78	157	504	642	422	343	195	229	474	352	275	190	255	407	477	141	411	443	379	83	81	72	702	855	826	315	286	319	246	653	755	457	434	619	235
CDC6	70	27	147	185	163	172	131	276	121	59	43	29	60	137	101	100	62	63	57	41	31	445	598	372	77	61	85	120	223	84	123	75	105	165	208	104	182	184	153	84	61	114	77	211	90	87	73	75	194
CDCA1	25	14	63	52	35	36	29	33	23	16	12	14	20	47	32	38	17	29	10	14	8	70	88	62	19	25	42	40	47	28	26	19	28	43	46	30	62	81	56	32	23	26	28	69	43	41	19	27	36
CDCA7	55	41	85	68	107	102	89	114	85	43	49	82	82	131	110	117	46	33	23	94	55	157	162	121	89	65	83	58	187	40	100	38	65	114	131	73	124	146	165	54	95	79	63	92	58	63	41	61	68
CDH3	185	150	80	51	102	800	715	1542	703	385	198	79	97	377	181	218	244	172	166	330	173	65	83	100	29	63	53	86	257	455	362	61	314	107	72	80	914	1023	844	53	335	112	132	84	163	117	61	236	155
CEGP1	1334	622	1024	2488	1958	448	995	2031	968	95	96	755	581	184	122	296	242	255	228	244	128	1825	1817	1418	501	354	7531	6291	180	433	1048	195	591	333	345	213	1461	1644	1007	7817	3994	3283	3045	2102	3414	2087	3376	2928	1470
CENPA	72	18	164	163	151	67	64	74	49	20	18	28	33	82	77	97	32	26	23	31	8	179	189	161	31	13	56	63	51	33	41	57	74	66	95	60	198	150	133	35	29	92	63	82	36	47	26	50	53
CENPF	370	117	220	317	287	100	87	187	63	79	48	176	190	239	163	201	152	108	83	66	21	427	683	443	130	86	193	201	226	61	120	85	131	235	355	201	571	511	402	127	73	265	167	286	221	196	69	101	192
CEP55	70	31	207	224	182	66	48	113	50	34	21	43	52	100	61	66	42	25	29	41	25	211	266	174	83	56	65	99	95	35	71	72	104	100	113	70	355	378	301	66	49	143	89	145	90	110	62	75	101
COL4A2	750	602	824	586	1333	2244	656	1326	704	911	612	715	1073	762	451	699	815	885	735	832	633	1063	1387	1654	1292	1063	2112	2671	1719	552	1305	576	1055	626	604	514	1073	1687	1674	1544	1819	846	1274	1429	1601	1378	884	2017	960
CTSL2	9	12	53	37	42	16	19	21	35	14	13	11	13	19	10	18	15	14	12	13	4	17	25	14	21	10	14	29	24	20	20	17	27	12	13	13	27	22	27	24	37	26	22	28	31	12	20	27	25
CXXC5	595	321	286	575	605	694	479	1135	473	547	414	474	537	600	413	576	830	876	527	535	225	1934	3020	2128	768	445	1115	1290	1495	798	857	792	777	467	620	425	893	714	805	652	654	1325	1099	1192	920	923	940	1123	1362
DCK	264	166	353	561	626	380	177	419	175	185	189	289	340	554	396	393	139	185	155	287	140	619	634	655	362	232	521	657	472	334	433	294	486	420	512	390	789	726	818	479	321	533	543	473	517	443	336	632	382
DHCR7	57	51	72	98	68	116	81	129	65	51	50	55	49	109	85	168	39	48	41	72	37	203	234	208	41	51	94	92	72	37	60	931	674	37	71	62	214	201	203	85	52	114	78	77	53	71	68	119	141
DIAPH3	28	15	75	75	63	21	28	34	19	24	10	16	18	45	23	34	20	19	12	13	7	151	142	104	22	16	21	36	45	12	31	29	18	19	32	19	71	68	52	22	22	41	36	53	27	38	28	28	21
DTL	128	40	140	139	172	92	106	113	92	80	47	55	77	124	117	135	76	59	46	61	35	182	260	191	90	78	104	106	195	83	101	46	87	140	172	112	209	251	198	51	70	116	66	200	82	90	53	64	95
EBF4	95	87	184	311	284	167	140	322	146	94	77	317	292	94	60	134	186	230	129	337	162	194	313	229	88	92	137	143	311	107	175	52	151	160	255	193	139	177	205	217	190	166	147	141	265	200	267	401	208
ECT2	472	246	575	864	815	671	566	988	476	341	203	319	395	709	569	701	281	300	191	285	153	1056	1324	1029	491	341	732	700	916	294	432	368	529	393	551	388	1410	1231	1019	467	365	725	494	620	298	321	368	478	2006
EGFR	204	289	175	44	269	650	204	297	312	280	332	54	163	380	94	196	160	134	120	128	160	59	90	248	194	220	125	391	242	50	282	94	347	149	55	96	213	225	332	142	373	87	180	236	336	329	217	369	192
EGLN1	220	180	203	334	331	406	172	376	243	341	225	509	478	353	253	311	289	314	220	211	170	365	515	464	240	199	356	510	440	323	407	615	669	243	314	240	693	645	824	260	332	448	365	421	506	334	226	458	230
ERBB2	1260	631	668	1556	1273	3196	2710	6755	2612	1249	811	354	477	772	542	844	2199	2114	1390	1554	661	2344	3991	2242	1262	913	2338	2128	1924	2744	2215	865	1277	873	1336	960	1302	1263	1223	2663	1574	1683	1536	2133	1357	1113	4513	3742	3777
ESM1	78	73	135	88	143	90	130	117	97	88	57	172	113	107	79	128	68	114	80	146	88	114	222	159	141	110	226	184	150	179	125	108	93	54	75	45	132	185	155	224	157	174	193	195	236	114	179	256	99
ESR1	872	369	1611	3840	2972	438	414	998	470	538	454	2329	2317	654	669	1022	1395	1475	899	763	406	5347	8523	4754	3148	1948	7167	6159	11085	5377	4733	1366	1161	180	296	157	2978	2353	2606	2755	2059	10469	8907	2439	1173	1055	318	426	2072
EXO1	69	61	133	117	135	77	112	113	86	81	52	92	103	148	105	184	56	52	52	61	59	193	231	173	91	79	88	74	104	54	70	53	50	131	159	104	171	158	174	60	71	111	76	172	82	90	56	53	112
EXT1	290	232	537	814	782	650	256	304	284	744	339	377	344	317	210	299	384	418	272	428	214	290	460	334	440	334	521	678	437	227	368	518	423	324	307	246	581	599	630	593	548	856	653	460	648	466	324	622	801
FGF18	21	15	44	56	84	155	32	50	43	41	57	17	25	45	36	65	40	52	46	40	49	38	76	53	86	53	40	67	58	19	54	40	42	23	22	24	39	34	109	38	60	83	45	40	75	71	41	106	56
FGFR4	105	54	82	74	109	123	136	156	123	86	102	98	124	121	115	158	57	46	40	385	172	128	134	115	74	78	61	58	70	35	51	35	60	298	702	481	61	77	97	65	98	91	78	126	74	81	117	313	171
FLT1	125	76	130	133	265	246	93	167	118	254	151	97	158	99	64	100	72	104	78	142	124	166	230	232	204	185	220	437	244	112	226	99	138	83	97	71	173	188	207	307	391	193	184	249	183	180	176	324	155
FOXA1	2008	866	1923	4312	3317	1743	1912	3886	1651	1729	1116	1351	1589	1827	2013	2281	2981	3609	1847	1856	969	4293	6505	3735	2985	2022	5425	5010	3398	5095	3566	2624	2513	1512	2177	1448	2935	3113	2652	5232	2815	8145	5914	5223	2843	2411	5812	5476	3790
FOXC1	112	100	110	74	142	205	136	149	119	107	98	104	131	171	89	156	68	64	43	88	99	41	52	68	120	104	77	112	84	37	104	67	109	55	94	48	67	66	117	73	166	103	91	81	73	87	67	171	84
GAPDH	6283	3701	6965	12187	12074	10132	6286	14207	6698	9085	4579	4031	5067	16321	12257	14735	8493	9384	5876	8795	3232	11954	22077	16089	7603	4994	9455	13985	8577	4933	6752	21243	17938	9198	12013	8051	24316	24408	22102	11732	10013	18710	14605	17399	18482	13204	15880	21693	10644
GMPS	257	158	248	415	394	273	147	342	186	291	183	268	297	530	390	483	248	266	189	170	127	649	990	616	404	234	756	636	551	243	337	409	523	334	392	235	852	766	710	368	364	572	478	555	356	288	332	544	379
GNAZ	36	43	60	52	62	65	41	54	47	40	32	39	53	78	50	81	41	33	65	40	27	99	103	81	29	37	65	109	143	21	70	72	63	64	65	53	82	76	99	67	61	43	57	36	53	37	30	79	68
GPR126	24	41	44	81	89	75	46	54	41	84	56	22	21	84	45	63	28	30	27	26	19	129	355	167	63	49	52	105	59	26	65	41	55	82	96	73	113	135	148	55	66	48	59	73	74	68	58	113	49
GPR160	302	94	423	890	655	582	454	1027	458	184	129	459	728	466	475	536	202	221	144	246	119	684	926	562	425	335	629	537	1127	1172	814	762	692	552	863	647	1143	903	844	692	323	1049	735	552	365	285	572	642	1439
GPR180	80	57	152	182	164	166	123	194	106	111	77	89	109	124	93	113	143	182	85	122	51	381	623	341	174	123	184	291	250	99	157	224	254	109	121	93	239	244	254	193	177	275	230	199	255	172	188	256	171
GRB7	142	122	130	224	235	354	381	832	365	203	131	55	77	130	57	102	293	323	243	126	71	260	381	250	106	101	227	241	271	456	317	74	152	176	224	144	151	99	144	256	229	136	111	170	139	130	719	559	403
GSTM1	1225	529	75	63	85	50	96	62	61	38	31	105	193	68	59	91	1574	1693	1073	57	57	152	171	186	70	43	137	252	65	23	42	18	41	114	128	105	427	330	389	34	68	47	41	58	29	26	5371	3567	52
GSTM3	88	69	59	69	55	104	55	104	69	52	80	17	29	137	138	179	208	250	162	146	88	59	69	83	114	93	180	137	164	167	121	95	136	20	22	26	48	42	76	133	110	88	78	148	136	130	1313	959	428
GUSB	476	239	335	637	599	732	458	1160	522	425	284	222	412	307	275	264	215	255	194	356	217	707	862	680	575	604	463	821	635	593	618	1218	1377	266	343	274	690	769	778	683	541	1703	1281	706	564	424	427	1110	749
HMBS	116	78	102	128	176	120	158	155	114	118	76	89	104	136	84	153	100	93	65	125	72	184	365	180	142	100	136	157	115	68	133	101	129	76	136	65	198	189	191	145	166	127	138	129	110	86	161	251	218
HOXB13	20	7	46	19	23	90	107	203	92	13	16	77	86	60	97	103	18	13	18	72	20	190	299	143	17	23	18	20	358	303	238	22	25	24	26	22	189	231	128	24	23	30	21	202	73	67	42	58	35
HRASLS	34	33	63	21	20	21	33	41	30	28	18	14	25	33	17	55	38	44	19	15	11	119	159	84	54	54	93	83	357	101	109	10	13	10	16	18	129	138	96	7	13	82	64	83	38	41	41	39	36
IGFBP5	1398	968	7469	27654	20081	6898	5357	11093	5071	950	1691	2101	1609	952	781	1326	2445	1932	1694	1539	991	1381	1664	1576	5756	4001	6186	6440	2349	1380	2352	9014	8591	1825	1971	2421	6928	7146	6935	1396	2088	1745	2614	39316	10770	8018	5433	5407	23534
IL17R	134	102	210	331	382	256	117	268	163	233	172	130	162	264	202	233	159	232	165	167	136	289	320	327	214	139	204	376	325	142	255	234	356	244	234	207	290	284	338	323	352	320	332	542	399	367	166	357	223
IL6ST	2873	1377	7617	11726	12397	4012	1944	4852	2281	3052	2050	2259	2405	5509	5084	5789	2903	3006	1901	2131	1306	1453	2076	1935	4305	2856	9949	10080	2173	3880	3710	5378	5466	2005	2055	1589	3435	2726	3678	6735	5449	7773	6304	5815	4722	4072	6285	5750	5930
JHDM1D	176	159	188	189	254	586	203	464	326	352	204	185	231	272	223	236	171	207	156	145	120	217	422	340	265	215	174	349	291	283	356	322	443	291	340	254	408	364	415	358	413	273	281	298	279	219	342	506	570
KIF2C	81	40	92	167	126	72	49	112	52	17	18	39	64	98	83	85	39	29	32	24	17	202	231	183	49	44	67	57	96	58	65	52	62	63	105	52	219	208	163	45	33	87	80	125	71	59	64	73	135
KNTC2	35	20	91	94	99	40	49	61	34	30	22	21	34	100	64	74	24	30	22	34	20	131	156	143	44	41	39	64	58	21	24	32	67	70	88	43	91	102	85	36	35	68	46	106	47	58	27	55	65
KRT14	368	430	262	67	543	502	483	496	1242	318	580	97	201	650	97	213	506	401	307	364	284	29	63	608	49	344	86	385	402	108	956	222	930	176	78	135	118	38	264	150	1812	181	246	77	134	255	100	799	571
KRT17	453	836	547	28	1132	1135	579	890	3412	2092	976	66	281	1122	93	412	1419	1307	827	1222	596	21	91	591	50	446	86	445	443	219	1363	403	1194	289	92	220	74	86	381	126	2620	420	420	47	257	345	187	1536	833
KRT5	528	870	378	103	673	557	442	677	1315	322	599	117	250	830	157	416	481	487	373	562	360	31	71	551	111	323	121	313	248	106	675	213	1083	217	131	219	85	92	279	136	1631	297	352	141	204	338	118	679	477
LGP2	123	111	186	251	322	220	187	340	167	147	95	252	250	273	184	216	145	191	137	123	59	397	431	391	198	144	203	310	484	249	289	254	322	455	441	351	161	201	226	248	179	272	292	288	398	297	435	420	266
LIN9	108	63	121	91	106	78	70	119	65	43	58	100	95	101	78	99	57	71	41	50	32	108	136	118	63	45	99	118	148	79	95	67	111	76	76	54	137	148	104	101	57	116	102	186	118	88	65	88	157
LOC100131053	15	16	30	22	33	32	33	43	29	16	25	23	27	42	33	49	28	18	13	13	11	21	23	20	12	24	36	39	24	14	34	33	36	17	29	18	36	22	32	31	37	20	28	25	25	30	23	25	35
LOC100288906	62	34	91	61	99	84	111	66	70	47	48	85	52	88	78	138	27	28	32	62	53	35	33	44	57	46	46	38	52	24	54	23	47	32	66	28	36	26	35	33	71	73	54	55	30	43	52	46	37
MAPT	834	440	62	310	135	218	326	659	216	841	473	355	349	705	624	770	1125	1293	686	1069	388	651	722	687	874	588	1764	1701	2486	2011	1372	651	709	61	113	49	1804	1472	1235	1436	940	1659	1356	1042	908	707	2876	2321	1372
MCM6	224	100	229	281	274	312	150	364	158	169	111	149	178	414	259	255	169	187	125	134	100	392	498	375	293	199	359	368	591	246	339	159	262	348	383	270	552	623	627	295	219	415	348	480	382	283	226	406	331
MDM2	338	213	567	2051	1315	483	241	511	251	305	235	560	475	455	306	355	237	238	169	422	174	682	982	735	345	254	870	929	721	565	593	495	576	490	622	431	556	590	598	548	495	890	706	911	844	597	705	885	862
MELK	115	86	150	189	216	124	170	153	119	125	83	123	157	166	128	191	72	69	64	118	77	357	391	328	147	98	118	126	141	70	124	84	133	159	180	109	276	287	207	83	121	155	149	177	96	91	87	108	204
MGP	10791	6485	8184	5095	10332	35798	21788	46974	24576	3512	5970	1913	6163	5723	2414	5328	20124	20734	11334	12019	11479	18402	40083	22136	77325	45679	5347	20474	87552	23864	38028	17728	20875	13238	13556	9774	7791	2845	15382	44651	59017	27442	32761	17093	17917	17632	22996	28918	85897
MIA	100	118	95	68	100	133	132	172	138	58	91	62	77	196	71	128	124	104	88	98	59	68	61	102	75	93	54	104	130	46	149	69	324	65	96	53	49	53	76	98	245	111	96	54	68	81	55	191	139
MKI67	111	39	192	277	263	91	63	113	61	59	29	65	98	181	109	149	48	33	34	52	14	247	233	225	79	41	83	142	97	37	50	69	115	122	179	98	377	329	311	76	50	139	93	147	87	111	58	68	123
MLPH	149	86	350	650	547	316	240	488	240	182	168	143	146	247	166	229	114	113	77	144	83	363	404	345	202	132	556	583	334	939	515	65	156	140	227	185	117	110	145	258	177	339	273	417	326	344	194	207	206
MMP11	850	615	141	210	307	930	1871	3297	1482	423	90	1622	719	297	619	1068	4882	7583	3956	1932	542	712	1332	1093	1338	939	1961	3571	1876	1488	1719	2251	1981	158	191	112	4203	4090	3312	3547	1020	2736	1779	6123	6657	3462	7161	7977	4545
MMP9	72	54	51	48	115	47	119	373	115	328	170	506	619	370	823	409	806	784	624	198	29	242	441	389	1289	440	400	1323	996	92	801	114	437	782	872	676	251	901	612	95	2684	107	228	59	1145	688	77	593	1186
MRPL19	191	122	211	351	313	275	176	389	226	208	108	195	175	263	213	249	198	207	143	193	96	388	587	395	235	167	380	474	369	348	273	421	433	203	209	189	538	496	488	334	266	493	384	528	387	288	430	473	313
MS4A7	145	102	355	614	594	1038	626	1460	603	266	172	251	389	230	307	421	262	481	216	143	104	373	399	447	1077	643	565	1359	349	280	380	310	431	260	232	190	287	324	426	892	618	911	1058	480	542	470	860	1415	250
MTDH	432	241	600	979	965	709	427	907	401	903	460	446	457	773	596	606	629	609	395	617	280	933	1528	895	597	382	701	913	851	618	690	1019	974	593	633	507	1484	1462	1309	861	691	1380	1090	1045	932	719	914	1496	922
MYBL2	76	26	100	118	143	85	64	134	74	103	29	32	54	310	251	226	59	37	36	29	19	614	676	605	55	39	104	99	253	62	86	97	190	269	358	221	643	599	536	45	29	130	102	265	143	143	42	49	287
MYC	669	934	1236	1255	1954	2113	292	534	1009	1338	784	509	665	1530	933	1020	416	343	484	565	368	804	1396	957	526	549	487	1161	1121	257	936	215	1066	692	521	507	638	348	852	382	1483	745	1112	1455	1107	1131	1514	2311	600
NAT1	69	49	109	114	108	203	291	505	230	131	144	101	130	83	82	133	41	51	26	88	61	52	64	49	238	149	809	652	348	356	348	219	235	59	109	58	39	39	57	617	405	346	316	772	292	303	237	212	82
NEK2	262	91	275	214	170	61	57	119	69	62	40	30	51	162	103	147	93	89	42	33	17	306	410	298	63	41	139	166	186	72	119	66	116	93	134	92	368	387	321	74	39	121	116	282	149	149	52	54	168
NMU	74	25	48	56	64	19	29	32	21	24	17	21	19	66	49	60	12	22	10	16	20	32	29	32	19	22	12	24	35	15	18	12	17	20	12	19	71	47	53	18	19	33	27	28	44	20	14	21	25
NUSAP1	100	41	274	379	328	134	120	272	94	83	42	50	95	155	114	114	70	86	42	74	25	487	518	432	125	89	148	178	225	147	154	93	161	180	187	136	349	402	305	161	75	291	180	348	166	169	81	118	227
OAZ1	1214	804	1497	2245	2286	3361	1918	4487	1966	2596	1447	1383	1967	2438	2077	2143	1614	1627	1190	2051	1041	3916	6169	4322	3017	1844	2256	4285	4119	2796	3091	4742	5454	2029	2165	1767	4657	4617	4533	4344	3287	6547	5547	2325	2351	1761	2664	4311	2859
ORC6L	68	47	93	108	111	113	119	134	99	61	31	62	82	119	105	144	44	32	34	66	43	196	253	159	92	66	67	65	180	69	106	55	83	162	188	109	243	238	222	42	56	106	111	86	57	54	69	74	296
OXCT1	141	99	207	215	279	211	87	194	111	117	103	113	169	368	188	231	315	292	168	127	65	137	138	195	220	180	174	338	195	127	228	519	418	218	224	205	318	284	339	174	218	401	362	559	386	216	156	311	204
PALM2	30	32	49	32	33	50	32	52	36	95	37	35	32	34	23	39	47	39	26	40	43	15	29	33	48	38	29	67	61	22	62	30	37	18	15	13	53	40	63	40	62	45	60	43	44	39	23	47	55
PECI	222	108	189	303	272	261	151	454	181	242	208	270	272	349	299	311	186	146	90	185	105	295	442	325	219	175	690	569	153	473	347	401	451	357	582	372	426	343	371	548	353	726	536	475	358	241	466	638	349
PGR	617	250	104	293	173	227	170	335	153	237	222	464	346	628	596	683	782	839	358	47	27	115	129	99	353	269	688	697	306	485	258	1402	984	73	72	45	941	230	491	199	484	58	57	582	526	321	892	820	1823
PHGDH	214	165	158	211	201	378	359	797	427	78	160	51	133	542	158	273	99	120	81	84	96	399	509	515	205	155	198	385	580	320	366	846	945	420	425	299	758	807	623	229	225	409	304	337	203	151	50	121	277
PITRM1	179	128	170	191	193	280	167	292	182	309	128	216	192	343	321	304	169	172	100	180	114	261	301	212	192	132	261	366	267	195	232	282	392	164	210	134	560	492	482	301	258	400	367	387	315	205	283	378	305
PRC1	131	56	198	283	206	97	64	162	76	78	44	41	63	153	111	130	72	45	52	51	36	444	413	365	101	43	122	136	210	105	123	57	116	96	120	87	296	302	213	96	80	162	125	214	111	113	66	96	135
PSMC4	354	207	581	1018	1031	537	308	753	406	645	294	431	449	482	345	384	513	616	363	401	258	850	1665	1006	649	476	886	1198	943	657	818	725	803	498	646	436	1083	900	949	735	684	1327	1052	809	751	567	888	1100	894
PTTG1	190	125	471	529	542	213	206	289	155	96	76	167	213	428	361	337	152	94	95	118	82	648	741	526	255	137	185	200	226	116	176	140	267	278	373	220	582	548	549	197	162	327	232	418	251	224	154	181	270
QSCN6L1	106	80	169	157	195	156	91	162	104	179	114	115	119	210	138	188	88	109	65	150	74	227	359	226	161	103	168	207	405	131	214	139	201	182	191	160	137	132	168	183	189	245	209	199	207	170	89	200	257
RAB6B	18	26	40	16	40	60	21	40	28	34	29	43	48	38	29	53	27	24	15	26	25	24	22	42	38	20	24	49	40	21	57	51	63	19	21	16	54	42	61	19	36	36	40	29	16	23	16	50	27
RACGAP1	45	26	90	84	85	65	96	57	55	48	47	34	70	78	73	104	36	30	20	57	47	42	59	56	43	62	61	53	60	33	44	38	47	46	55	28	57	41	50	39	63	60	43	53	46	51	51	52	64
RASSF7	116	76	47	86	74	134	158	322	153	85	49	109	111	82	38	46	86	94	59	78	35	100	160	114	103	84	420	382	128	192	179	90	145	44	68	50	185	188	194	268	143	171	125	227	94	131	163	261	347
RBBP8	238	161	379	647	578	499	381	1019	368	199	167	341	293	563	405	458	108	88	85	194	78	358	462	338	205	154	444	544	363	212	276	1857	1430	114	136	91	321	214	261	397	375	651	566	534	299	265	225	295	306
RECQL5	239	127	272	413	387	166	107	253	127	118	91	153	146	302	172	228	319	311	197	201	76	229	360	265	262	213	376	397	530	340	353	316	368	245	332	301	269	285	270	369	248	452	351	310	290	211	344	438	670
RFC4	154	85	177	204	259	186	208	280	146	160	114	157	197	329	242	293	113	141	77	157	96	324	440	316	242	163	277	236	444	123	148	136	172	177	216	143	466	458	413	174	189	235	184	263	200	170	221	261	207
RPL37A	12100	8342	8324	11124	11631	18429	12069	27230	12746	18509	13053	10830	11903	26394	15048	17808	12464	13142	10005	11858	6398	15162	21923	15456	13513	8979	12021	19043	20779	14504	14696	7642	14422	11226	13031	10249	24758	21399	21497	20125	18597	31035	28153	21857	20252	14846	19981	26199	19127
RPLP0	8807	5764	7051	9992	11916	11661	8597	18937	8849	12933	9126	3320	5068	27101	19289	26824	6556	6213	5268	6215	3362	6514	11618	9165	7459	4951	9031	11979	8534	5369	7298	8710	13237	6437	9296	6454	11573	10337	11971	11452	11457	16662	16291	22197	16693	13165	13756	19454	8568
RRM2	167	68	335	440	371	243	157	473	194	196	71	56	200	322	273	295	121	95	87	98	30	1229	1083	1051	302	170	176	227	362	171	186	296	414	487	527	353	686	802	663	218	126	491	342	536	229	231	139	192	453
RTN4RL1	63	37	84	116	123	81	91	196	86	128	65	63	80	94	88	90	90	122	60	73	39	334	448	277	52	36	219	228	122	125	115	44	76	37	40	27	278	190	200	81	76	416	291	105	90	56	164	198	114
RUNDC1	238	150	291	521	479	204	189	251	196	457	140	156	207	248	164	209	287	288	183	302	125	336	558	314	294	204	384	473	393	374	319	214	243	185	218	175	308	298	273	506	325	454	448	367	307	232	486	453	284
SDHA	204	137	216	231	283	360	243	499	265	210	195	369	446	427	278	445	286	317	197	234	157	417	599	527	392	295	537	667	470	255	412	339	496	215	259	228	425	390	398	452	436	594	510	508	332	263	400	732	417
SERF1A	257	188	244	396	362	270	221	396	215	235	152	218	241	393	327	411	309	382	211	396	151	243	426	350	347	265	214	282	549	583	511	368	461	204	289	219	436	437	432	455	389	493	425	632	495	373	344	467	392
SF3A1	143	85	142	209	253	240	152	286	144	167	130	117	155	215	117	196	178	207	122	135	107	231	290	264	135	90	156	252	290	128	201	258	353	184	189	142	237	213	237	330	296	293	269	208	176	150	185	372	272
SFRP1	564	1122	144	17	218	554	360	433	868	309	1424	21	137	2025	120	636	74	20	149	71	270	28	29	329	99	378	97	419	504	27	688	34	1420	215	69	162	63	29	303	192	1462	64	269	116	125	269	43	1099	189
SLC2A3	9	16	51	34	33	48	36	47	32	16	13	30	26	33	22	41	14	16	17	18	16	18	13	22	22	19	15	30	27	14	21	12	14	15	21	15	18	22	30	20	25	38	24	21	22	24	13	31	25
SLC39A6	1540	828	16569	38019	27769	2869	2575	7788	2233	1664	2025	1046	1209	1301	904	1143	2198	1640	1579	2518	980	4313	7428	4513	4792	3074	5976	6326	5418	6078	6099	14630	10066	706	1510	1038	2056	1693	1995	11283	9932	7924	5175	16346	5394	5820	4573	5349	10823
STC2	3524	1610	1332	1794	2718	899	579	1395	910	234	338	1486	1234	558	436	742	5132	6547	2926	9019	3031	371	842	738	5913	4163	9585	10860	187	336	679	407	1336	284	298	173	1179	741	1083	9776	5630	8515	7739	1175	2302	2119	11487	10201	7831
STK32B	184	110	234	374	368	207	198	152	153	109	93	140	156	171	151	211	94	85	72	205	140	55	47	65	142	109	183	154	80	82	143	58	77	73	93	47	96	137	167	611	339	504	472	154	183	149	303	446	95
TFRC	470	231	379	579	581	549	474	1022	443	811	347	410	498	683	715	634	484	547	314	333	161	1647	2461	1645	588	364	280	914	815	449	539	1556	1226	434	535	389	1265	1316	1260	596	756	1189	910	1054	661	558	1375	1664	648
TGFB3	724	312	412	413	584	1221	706	1387	615	528	403	675	649	537	539	728	669	677	529	1275	723	607	885	660	797	561	852	642	888	787	1020	670	758	427	497	318	930	709	943	1115	914	1024	992	1025	1921	1185	1008	1901	929
TMEM45B	26	11	56	60	61	53	51	53	36	111	20	60	37	24	30	37	37	34	29	44	28	27	29	26	60	45	23	39	25	17	23	22	26	28	28	25	36	46	35	50	34	44	39	21	28	25	257	369	93
TSPYL5	75	70	90	37	88	136	82	141	72	71	86	256	220	264	301	306	101	100	61	88	60	44	91	83	101	79	103	135	515	366	350	868	794	137	165	138	618	621	554	109	119	574	511	254	269	199	233	388	126
TYMS	322	105	476	579	644	255	175	368	160	180	103	116	180	476	314	340	135	105	85	168	43	1363	1549	1177	340	168	308	409	389	160	278	191	318	330	355	218	514	591	502	315	192	522	393	916	315	414	174	311	517
UBC	20877	15682	30521	44452	49972	48804	20577	47359	29046	37166	16929	21773	25525	44952	26562	32436	23415	26320	19017	33775	18635	62610	96964	63944	30911	22657	51418	67918	64671	51729	55451	48185	53060	35867	34313	29930	92910	82924	101508	101000	62572	68068	62106	72146	70446	57050	56091	78774	37951
UBE2C	297	135	576	945	780	218	196	398	173	154	144	238	349	415	248	335	183	170	121	117	55	1421	1795	1355	310	193	558	689	467	620	578	502	664	467	551	358	1295	1291	1205	471	306	683	550	583	424	406	330	437	620
UBE2T	204	67	212	249	205	93	75	161	58	79	63	65	101	276	185	202	181	165	97	47	28	439	494	396	108	60	189	204	257	136	159	171	208	220	219	172	536	448	377	150	70	185	132	274	154	160	87	112	237
UCHL5	142	85	110	161	183	177	101	206	103	165	127	68	101	183	178	193	206	238	138	129	50	246	365	301	121	110	159	216	259	138	158	237	229	162	130	102	434	407	348	177	164	226	237	348	237	180	185	230	227
WISP1	187	98	177	94	200	237	290	419	210	197	125	234	189	131	132	234	171	294	148	356	177	198	295	215	419	237	153	209	291	243	315	263	228	113	136	80	220	288	325	526	272	473	366	324	937	485	631	814	413
ZNF533	54	27	67	106	103	36	67	67	28	23	32	200	155	27	20	69	30	14	23	47	62	29	31	26	18	24	409	137	22	21	27	279	175	193	275	139	39	14	54	1022	609	1395	1136	42	64	31	376	335	29
NEG_A	20	26	36	23	47	26	30	34	22	19	17	12	20	29	23	33	26	26	22	18	16	28	12	23	24	22	27	34	25	18	29	21	23	28	22	22	31	16	38	17	37	30	36	29	19	27	29	23	19
NEG_B	54	57	49	66	87	59	88	57	59	60	64	66	51	69	50	102	69	56	63	63	47	60	75	73	70	65	69	70	82	44	80	50	63	69	69	58	64	41	62	54	86	74	64	66	50	57	45	78	60
NEG_C	15	17	27	37	42	23	47	28	31	15	16	12	9	32	40	45	18	26	15	21	12	30	13	18	16	16	20	19	24	15	27	11	10	26	15	16	28	22	21	19	29	22	18	24	25	23	14	21	20
NEG_D	13	14	16	27	35	24	27	24	16	15	14	28	12	26	11	33	15	8	6	19	17	5	16	12	22	11	16	19	17	11	9	13	18	24	15	11	15	20	24	10	13	26	16	8	20	17	13	19	16
NEG_E	17	28	24	19	35	24	26	23	23	16	19	11	14	18	21	34	22	24	21	19	17	29	10	21	15	21	24	22	19	8	20	16	17	13	21	23	24	21	18	22	30	33	16	27	36	7	27	24	27
NEG_F	22	24	24	32	34	19	36	31	29	24	18	24	28	30	32	42	33	25	22	24	25	16	24	30	20	26	17	23	44	22	34	14	30	40	32	19	29	19	32	22	32	18	31	26	17	29	15	20	24
NEG_G	71	53	82	95	101	89	125	73	90	57	48	91	85	84	98	135	43	39	28	79	73	28	24	35	88	82	48	51	41	29	48	36	43	39	67	24	34	36	62	41	65	49	67	54	35	40	53	60	56
NEG_H	49	39	92	94	128	94	117	102	98	55	51	86	87	93	70	115	52	49	33	79	60	35	25	41	72	74	76	51	58	28	57	36	44	43	76	38	37	42	70	40	68	80	65	74	51	57	53	47	76
POS_A	32900	32111	29538	28110	43825	33245	42033	35165	29757	34458	34246	30570	36414	32271	24888	45191	40044	33079	29290	31457	28558	33167	37293	40529	32412	33475	40797	39312	41076	18041	35585	28761	33746	36987	43329	34935	32660	22759	32538	34371	44053	42686	41497	28919	26267	32033	29111	41049	33879
POS_B	12512	12051	12351	11695	16754	12655	15823	13260	12459	12477	12475	11015	13101	13368	11024	16989	15799	13841	12331	11821	10871	13520	14262	15526	12264	12766	14193	14396	16152	7839	14212	10700	12665	15880	15868	14352	13286	9418	13533	12186	15260	15076	15014	11713	11159	12569	11165	14663	12500
POS_C	4173	4199	3741	3491	5157	4108	4448	4186	3819	4281	4446	3812	4271	4150	3447	5489	4648	3958	3738	3978	3629	4130	3989	4664	4068	4380	4583	4809	4754	2314	4316	3665	4431	4885	4846	4312	3847	2834	4152	4117	4804	4892	5035	3500	3329	3865	3733	4923	4127
POS_D	565	553	517	528	724	591	673	671	596	586	581	532	586	627	486	819	694	562	530	575	487	595	605	702	591	566	640	642	770	362	581	531	594	635	759	637	546	425	604	594	725	749	735	512	518	586	524	709	587
POS_E	242	223	202	207	341	256	306	271	243	216	238	210	202	279	226	298	290	237	222	222	167	241	246	258	239	222	244	277	294	149	263	219	226	262	309	249	239	209	253	238	278	283	259	211	188	222	236	268	210
POS_F	69	64	93	62	114	99	106	101	89	84	78	78	78	80	60	101	89	88	82	76	71	83	76	97	101	85	78	94	122	56	91	77	81	94	92	103	76	86	86	77	85	118	97	90	68	62	84	105	78
[truncated: 132 more columns]

## Sheet: Counts (Normalized to pos)
4)	Nanostring counts normalized to positive controls.
Gene Name	2_core	2_section	3_PR	3_core	3_section	5_Ki67	5_PR	5_core	5_section	6_core	6_section	7_core	7_section	8_Ki67	8_core	8_section	9_Ki67	9_core	9_section	10_core	10_section	12_Ki67	12_core	12_section	13_core	13_section	14_core	14_section	15_Ki67	15_core	15_section	16_core	16_section	18_Ki67	18_core	18_section	19_Ki67	19_core	19_section	20_core	20_section	21_core	21_section	22_Ki67	22_core	22_section	23_core	23_section	24_core
ACTB	11030.5	7907.25	11872.3	16767	13403.5	25540.9	10617.8	23939.8	17052.8	21158.1	9594.04	11606.6	13468.2	15696.2	16323.8	11901.3	14421.3	19507	16249.3	17263.5	10610.3	28901.2	44318.5	28926.9	18717.2	13632.4	23485.1	34290.6	17896.3	34568.5	22571.6	21759.6	25267	13772.6	13546.7	12736	45443.7	65063.8	43032.7	24005.8	17905.6	30347.8	26941	35844.1	43965.5	28507.4	27840.6	35134.8	21199.3
ACTR3B	129.84	104.77	187.7	236.8	154.71	161.66	104.11	221.84	151.59	104.69	73.92	102.76	104.37	190.68	148.47	116.74	135.33	203.5	118.52	175.96	84.66	141.57	239.28	133.96	119.49	97.3	118.51	154.8	259.05	528.61	302.76	249.52	258.51	157.9	163.46	125.95	255.67	282.92	189.92	300.03	165.07	118.13	140.29	328.5	248.14	156.67	199.31	250.33	304.59
AKAP2	75.83	109.09	206.23	258.32	248.03	448.72	129.03	245.4	202.12	260.71	172.82	106.08	169.21	201.1	139.27	122.49	100.35	104.96	122.01	106	140.29	171.38	229.84	247.6	164.54	193.59	152.77	457.41	294.6	151.8	266.43	178.71	257.51	192.89	131.99	178.11	180.87	222.2	296.94	223	380.93	137.28	167.17	179.07	286.02	251.38	149.48	279.63	189.98
ALDH4A1	63.36	37.8	61.41	64.58	59.76	117.1	123.69	261.1	128.52	72.48	50.95	98.34	168.2	92.74	74.89	61.66	58	82.47	49.97	119.78	64.1	208.63	287.56	209.72	54.85	74.23	101.84	213.4	104.13	94.65	90.83	148.36	213.59	182.49	205.41	146.62	94.9	133.87	143.75	142.92	94.81	136.49	110.05	189.75	168.48	118.09	188.48	264.56	173.46
ANLN	102.84	33.48	103.12	165.89	114.6	87.05	48.05	106.99	74.7	44.29	25.97	50.83	62.82	79.19	77.52	76.45	39.59	39.63	26.73	40.28	21.77	200.12	219.34	134.89	47.01	36.11	90.73	96.2	87.2	62.5	63.58	56.2	74.86	113.46	83.04	77.74	286.93	302.24	216.15	56.76	33.86	52.68	48.72	155.35	104.48	102.89	58.49	72	112.54
AP2B1	524.57	326.18	786.7	1213.11	769.47	862.21	504.55	1257.4	645.91	881.8	475.51	549.17	559.32	658.53	651.69	550.79	827.62	982.15	686.74	855.44	462	2185.34	2928.05	1774.78	634.65	441.34	806.42	1005.77	1329.95	2075.15	1272.59	338.31	585.89	385.78	393.34	299.14	1318.55	1068.2	987.36	1382.59	832.98	943.43	1045.05	1005.65	969.06	751.8	1534.9	1351.27	700.03
AURKA	96.6	54	181.9	168.42	135.07	116.07	106.78	128.59	98.86	77.51	62.93	119.34	109.43	184.43	151.1	139.75	68.12	79.26	61.59	78.44	76.19	223.54	279.16	130.27	108.71	75.23	77.77	104.08	106.67	128.58	96.88	109.02	108.79	91.72	102.27	74.78	226.64	281.54	185.72	66.9	77.03	110.15	90.73	124.52	118.85	79.51	81.24	79.54	223.02
AYTL2	199.44	123.13	244.47	350.76	246.39	324.37	129.03	275.82	181.25	330.17	155.84	227.62	252.3	282.37	303.51	223.61	231.07	295.61	208	214.12	139.08	649.32	921.44	570.96	240.93	151.46	164.8	258.88	317.46	228.59	262.39	440.59	443.16	241.11	270.97	200.74	732.41	701.09	625.37	202.73	286.97	244.24	246.98	371.19	500.2	305.16	203.64	278.79	280.84
AZGP1	3053.94	2200.12	7688.54	26960.8	14770.6	1902.67	1533.23	4139.33	2583.63	3160.78	2886	2466.3	4143.21	3423.92	3032.46	2956.2	1542.93	1961.09	1447.84	1466.01	1574.67	5072.15	9010.84	5642.17	4372.98	4200.76	7358.66	5507.23	1188.57	13083.1	5113.58	20601.9	14550.4	1814.47	3533.96	2914.63	8667.17	10584	7436.18	11000.9	7650.02	10969.2	8288.97	22371	6625.38	7691	10651.2	9619.66	12612
BAG1	92.45	77.77	225.93	535.64	300.42	204.15	115.68	276.81	145	156.03	136.86	119.34	164.15	199.02	181.32	167.7	57.08	77.12	60.42	198.22	93.13	298.05	422.94	270.7	103.82	76.23	209.24	178.41	187.09	400.03	252.3	205.68	204.61	107.79	126.74	97.42	127.28	131.11	159.49	96.29	105.82	138.88	141.13	152.98	104.48	101.72	108.32	107.16	288.07
BBC3	74.79	70.21	96.16	78.51	73.67	82.9	65.85	86.38	97.76	278.83	65.93	102.76	87.14	73.98	53.87	83.85	79.17	82.47	65.07	73.14	54.42	88.35	184.71	84.07	69.54	71.22	156.47	164.42	77.04	142.87	91.84	52.83	61.88	62.41	118.88	73.8	104.95	140.77	107.03	124.68	80.42	133.29	123.49	124.52	112.32	128.61	81.24	115.54	120.8
BCL2	200.48	165.25	433.32	674.94	450.22	365.82	218.91	553.61	308.67	160.05	148.85	558.01	485.35	340.72	310.08	207.16	358.12	293.47	275.39	360.41	182.62	585.45	875.27	465.64	352.58	302.92	318.49	474.02	336.08	996.5	468.27	296.72	358.32	155.07	181.81	135.79	324.89	303.62	322.13	781.51	429.19	665.67	678.78	846.74	651.7	446.63	797.24	627.08	966.42
BIRC5	189.05	71.29	499.36	799.03	519.8	82.9	87.21	159.02	92.27	72.48	37.96	101.66	115.51	237.57	214.16	149.62	103.11	88.9	81.34	102.82	43.54	686.58	747.23	546.02	111.65	87.27	166.65	183.66	289.52	207.16	173.58	184.33	241.54	329.04	385.48	312.91	430.96	518.92	326.32	117.58	81.27	198.74	142.81	442.34	228.55	222.15	113.74	118.89	597.82
BLVRA	376.03	241.94	893.29	2051.4	1123.92	658.06	423.57	991.4	455.87	235.55	187.81	760.22	720.43	539.74	542.64	464.48	198.85	238.84	218.45	449.45	212.86	1190.07	1921.6	1002.42	285.98	226.69	1026.77	1274.26	774.6	1210.8	667.08	1011.55	989.12	356.47	410.82	346.37	2534.39	2957.57	1888.69	598.04	519.76	873.19	655.25	1069.69	779.69	577.58	656.42	599.45	540
BUB1B	57.13	25.92	141.35	206.41	136.7	51.82	37.37	129.57	57.12	35.23	22.98	30.94	60.8	109.41	82.78	63.3	41.43	57.84	30.21	51.94	36.28	302.31	266.57	206.03	75.41	38.12	78.7	119.82	131.22	158.94	89.82	58.45	80.85	73.75	101.39	80.69	184.22	245.66	139.55	66.9	43.17	98.97	66.37	201.6	116.23	116.92	67.16	67.81	130.09
C16orf61	183.86	117.73	260.69	367.23	235.75	395.87	150.39	369.07	236.17	260.71	145.85	380.11	354.64	384.49	400.74	246.62	212.66	223.85	149.9	296.81	215.28	593.97	872.12	476.73	293.82	216.66	222.2	334.96	336.08	328.59	292.67	359.66	394.25	312.03	313.8	246.99	1126.52	1322.14	947.49	289.9	243.8	444.58	412.47	406.77	429.68	325.04	268.64	361.68	386.15
C20orf46	16.62	18.36	56.77	24.06	40.11	80.83	27.59	39.26	32.95	19.13	17.98	25.41	21.28	34.39	28.91	30.42	16.57	18.21	23.24	19.08	19.35	55.35	93.4	50.81	34.28	27.08	32.4	32.36	33.86	23.22	41.38	14.61	26.95	38.77	30.59	29.52	27.91	42.78	39.87	33.45	33.01	19.16	24.36	30.83	20.9	31.57	22.75	34.33	35.1
C9orf30	219.18	163.09	228.25	235.53	183.36	362.71	221.58	372.02	236.17	496.26	224.77	180.11	160.09	191.72	168.18	162.77	206.22	260.27	188.24	283.03	197.14	301.24	586.66	302.11	285.98	204.62	272.2	332.34	387.73	166.08	289.64	278.74	265.5	149.39	173.07	152.52	561.59	687.29	493.16	326.39	291.2	217.1	241.94	353.4	498.9	293.47	319.55	372.56	271.55
CALM2	3205.6	1557.47	2733.16	4462.43	2500.78	8311.21	5688	14008.1	6133.92	4259	2084.84	2200	2647.64	3968.87	4004.74	2431.72	2504.97	3035.36	2059.05	3418.58	1695.61	4610.18	7438.72	3981.02	3071.37	1934.88	3334.92	4337.05	2905.4	12818.8	4549.44	7168.53	6253.12	2978.42	2964.93	2469.86	7647.83	9376.45	6031.21	7693.45	4059.07	6337.43	5240.35	8138.89	6706.35	4330.72	6289.1	5380.81	4665.86
CCNB1	268	109.09	459.97	709.13	416.66	203.12	161.95	410.3	196.63	98.65	69.93	156.91	203.66	497.02	457.23	305.81	185.96	177.79	126.66	116.6	42.33	666.35	755.63	450.86	186.08	112.34	283.31	325.34	160.85	189.3	151.38	212.43	282.46	287.44	301.56	237.15	1037.2	1019.9	710.36	201.71	104.12	320.06	245.3	756.61	370.91	320.36	183.06	208.47	463.59
CCNE1	29.09	9.72	64.88	72.18	49.12	39.38	29.37	50.06	35.15	23.15	10.99	30.94	35.46	36.47	47.3	30.42	28.54	24.63	26.73	24.38	20.56	116.03	134.33	81.3	49.95	24.07	33.33	35.86	45.71	55.36	34.31	40.46	55.89	41.6	30.59	41.33	94.9	146.29	91.29	28.38	27.94	35.92	42.84	45.06	61.38	31.57	44.41	43.54	77.44
CCNE2	100.76	72.37	157.57	263.39	155.53	88.09	113.01	118.77	127.42	114.75	47.95	109.39	105.38	152.13	158.98	111.8	59.84	69.62	63.91	89.04	76.19	236.31	321.14	157.06	125.36	90.27	118.51	70.84	117.67	183.94	104.96	80.92	105.8	115.35	146.85	95.45	167.47	245.66	161.59	62.85	73.65	98.97	90.73	145.87	82.28	70.15	116.99	123.91	101.18
CD68	144.39	117.73	368.44	473.6	451.04	657.02	234.03	586	298.79	437.88	235.76	402.21	622.14	311.55	476.94	312.39	225.55	221.71	252.15	200.34	212.86	895.21	951.88	829.65	925.52	376.14	363.86	1593.49	336.08	475.03	432.94	505.78	678.71	476.55	400.34	351.29	679.93	1053.02	836.27	722.72	737.32	538.76	634.25	641.58	749.65	620.85	315.21	810.43	514.18
CDC20	211.91	102.61	334.84	382.42	243.94	147.16	159.29	222.82	138.41	94.62	82.91	159.12	183.4	349.06	268.03	237.58	66.28	65.33	66.23	116.6	89.5	425.78	531.04	348.3	129.28	102.31	141.66	120.69	124.44	135.72	106.97	179.83	248.53	144.67	171.32	115.13	475.62	677.63	427.05	124.68	92.27	207.52	147.01	311.89	205.04	176.55	95.32	118.05	375.83
CDC42BPA	222.29	218.18	236.36	273.52	215.29	563.75	231.36	533	374.58	429.83	301.69	160.22	172.25	165.67	102.48	129.07	463.99	687.61	490.36	363.59	235.84	243.76	497.45	325.21	269.33	190.58	236.09	355.95	403.81	251.8	414.78	497.91	378.28	78.48	70.8	70.85	783.76	1179.99	866.7	319.29	242.11	254.61	206.66	774.4	986.04	534.32	470.11	518.24	242.64
CDC6	72.71	29.16	170.32	234.27	133.43	178.25	116.57	270.92	132.92	59.39	42.96	32.04	60.8	142.75	132.7	82.21	57.08	67.48	66.23	43.46	37.49	473.68	627.59	343.69	75.41	61.19	78.7	104.95	188.78	150.01	124.13	84.3	104.8	156.01	181.81	102.34	203.2	253.94	160.54	85.14	51.64	90.99	64.69	250.23	117.54	101.72	79.07	62.79	200.3
CDCA1	25.97	15.12	72.99	65.85	28.65	37.31	25.81	32.39	25.27	16.11	11.99	15.47	20.27	48.97	42.04	31.24	15.65	31.06	11.62	14.84	9.68	74.51	92.35	57.28	18.61	25.08	38.89	34.98	39.79	50	26.24	21.35	27.95	40.66	40.21	29.52	69.22	111.79	58.76	32.44	19.47	20.75	23.52	81.83	56.16	47.94	20.58	22.6	37.17
CDCA7	57.13	44.28	98.48	86.11	87.59	105.7	79.2	111.9	93.37	43.28	48.95	90.61	83.09	136.5	144.53	96.18	42.35	35.34	26.73	99.64	66.52	167.12	170.02	111.79	87.17	65.2	76.85	50.73	158.31	71.43	100.92	42.71	64.88	107.79	114.51	71.83	138.44	201.5	173.13	54.74	80.42	63.06	52.92	109.1	75.75	73.66	44.41	51.07	70.21
CDH3	192.17	162.01	92.69	64.58	83.5	829.05	636.25	1513.6	772.23	387.55	197.79	87.29	98.29	392.82	237.81	179.21	224.63	184.22	192.89	349.81	209.23	69.19	87.11	92.39	28.4	63.19	49.07	75.21	217.57	812.56	365.33	68.56	313.4	101.17	62.93	78.72	1020.45	1411.85	885.58	53.72	283.58	89.39	110.89	99.62	212.88	136.8	66.08	197.58	160.04
CEGP1	1385.7	671.81	1186.42	3150.55	1602.79	464.27	885.41	1993.59	1063.33	95.63	95.9	834.25	588.7	191.72	160.29	243.34	222.79	273.12	264.93	258.65	154.81	1942.64	1906.91	1310.07	490.68	355.08	6972.58	5501.99	152.38	773.27	1057.63	219.17	589.88	314.86	301.56	209.59	1631.16	2268.9	1056.62	7923.54	3381.01	2620.37	2558.01	2492.78	4458.71	2440.12	3656.9	2451.38	1517.77
CENPA	74.79	19.44	190.01	206.41	123.61	69.43	56.95	72.64	53.83	20.13	17.98	30.94	33.44	85.44	101.17	79.74	29.46	27.85	26.73	32.86	9.68	190.54	198.35	148.75	30.36	13.04	51.85	55.1	43.17	58.93	41.38	64.06	73.86	62.41	83.04	59.04	221.06	207.02	139.55	35.48	24.55	73.43	52.92	97.24	47.02	54.95	28.16	41.86	54.72
CENPF	384.34	126.37	254.89	401.42	234.93	103.63	77.42	183.56	69.2	79.52	47.95	194.47	192.52	249.03	214.16	165.24	139.93	115.67	96.45	69.96	25.4	454.52	716.8	409.28	127.32	86.26	178.69	175.79	191.32	108.94	121.1	95.54	130.75	222.2	310.3	197.79	637.51	705.23	421.81	128.73	61.8	211.51	140.29	339.17	288.63	229.16	74.74	84.56	198.24
CEP55	72.71	33.48	239.83	283.65	148.98	68.4	42.71	110.92	54.92	34.23	20.98	47.51	52.69	104.2	80.15	54.26	38.67	26.78	33.7	43.46	30.24	224.6	279.16	160.76	81.29	56.17	60.18	86.58	80.42	62.5	71.65	80.92	103.8	94.55	98.77	68.88	396.35	521.68	315.83	66.9	41.48	114.14	74.77	171.96	117.54	128.61	67.16	62.79	104.28
COL4A2	779.07	650.21	954.7	742.05	1091.18	2325.48	583.75	1301.58	773.33	917.03	611.37	790.05	1087.22	793.98	592.56	574.63	750.29	947.88	854.07	881.94	765.57	1131.52	1455.63	1528.11	1265.37	1066.24	1955.4	2336	1455.24	985.78	1317	647.39	1053	591.9	527.95	505.78	1197.97	2328.24	1756.48	1565.04	1539.82	675.25	1070.25	1694.66	2090.92	1611.16	957.55	1688.67	991.2
CTSL2	9.35	12.96	61.41	46.85	34.38	16.58	16.91	20.61	38.45	14.09	12.99	12.15	13.17	19.8	13.14	14.8	13.81	14.99	13.94	13.78	4.84	18.1	26.24	12.93	20.57	10.03	12.96	25.36	20.32	35.72	20.18	19.11	26.95	11.35	11.36	12.79	30.14	30.36	28.33	24.33	31.32	20.75	18.48	33.21	40.49	14.03	21.66	22.6	25.81
CXXC5	618.06	346.71	331.36	728.12	495.24	719.2	426.24	1114.09	519.58	550.62	413.57	523.76	544.12	625.18	542.64	473.52	764.1	938.24	612.37	567.11	272.12	2058.67	3169.43	1966.03	752.17	446.36	1032.32	1128.21	1265.61	1425.1	864.88	890.17	775.53	441.56	541.94	418.2	997.01	985.4	844.66	660.89	553.63	1057.57	923.24	1413.6	1201.53	1079.17	1018.21	940.2	1406.26
DCK	274.23	179.29	408.99	710.39	512.44	393.8	157.51	411.28	192.23	186.22	188.8	319.34	344.51	577.25	520.3	323.08	127.96	198.14	180.11	304.23	169.32	658.9	665.37	605.15	354.54	232.71	482.37	574.6	399.58	596.47	436.98	330.44	485.08	397.12	447.54	383.76	880.9	1001.96	858.3	485.53	271.73	425.42	456.16	560.93	675.21	517.96	363.96	529.12	394.41
DHCR7	59.21	55.08	83.42	124.1	55.66	120.21	72.08	126.62	71.4	51.34	49.95	60.77	49.65	113.57	111.68	138.11	35.9	51.41	47.64	76.32	44.75	216.09	245.58	192.17	40.16	51.16	87.03	80.46	60.95	66.08	60.55	1046.39	672.72	34.98	62.06	61.01	238.92	277.4	213	86.16	44.02	90.99	65.53	91.31	69.22	83.01	73.66	99.63	145.58
DIAPH3	29.09	16.2	86.9	94.97	51.57	21.76	24.92	33.37	20.87	24.16	9.99	17.68	18.24	46.89	30.22	27.95	18.41	20.35	13.94	13.78	8.47	160.73	149.03	96.08	21.55	16.05	19.44	31.48	38.1	21.43	31.28	32.59	17.97	17.97	27.97	18.7	79.27	93.85	54.56	22.3	18.62	32.72	30.24	62.85	35.26	44.43	30.33	23.44	21.68
DTL	132.96	43.2	162.21	176.02	140.8	95.34	94.33	110.92	101.06	80.53	46.95	60.77	78.02	129.2	153.73	110.98	69.97	63.19	53.45	64.66	42.33	193.73	272.86	176.46	88.15	78.24	96.29	92.71	165.08	148.22	101.93	51.7	86.84	132.37	150.34	110.21	233.34	346.41	207.76	51.7	59.26	92.59	55.44	237.18	107.09	105.23	57.41	53.58	98.09
EBF4	98.68	93.97	213.18	393.82	232.48	173.06	124.58	316.07	160.38	94.62	76.92	350.28	295.87	97.95	78.83	110.16	171.23	246.34	149.9	357.23	195.93	206.51	328.49	211.57	86.19	92.28	126.84	125.07	263.28	191.08	176.61	58.45	150.71	151.28	222.89	189.91	155.19	244.28	215.1	219.96	160.84	132.5	123.49	167.21	346.09	233.84	289.22	335.73	214.76
ECT2	490.29	265.7	666.2	1094.08	667.15	695.36	503.66	969.8	522.88	343.26	202.79	352.49	400.24	738.76	747.6	576.28	258.69	321.32	221.94	302.11	185.04	1124.07	1389.51	950.68	480.88	342.04	677.72	612.21	775.45	525.04	435.97	413.61	528	371.59	481.63	381.8	1574.22	1698.91	1069.21	473.36	308.98	578.67	414.99	735.26	389.19	375.31	398.62	400.19	2071.19
EGFR	211.91	312.14	202.76	55.72	220.2	673.6	181.53	291.53	342.73	281.85	331.66	59.67	165.16	395.95	123.51	161.13	147.3	143.52	139.44	135.68	193.51	62.8	94.45	229.12	190	220.67	115.73	341.96	204.87	89.29	284.59	105.65	346.34	140.88	48.08	94.46	237.81	310.52	348.36	143.94	315.75	69.44	151.21	279.87	438.82	384.67	235.06	308.93	198.24
EGLN1	228.53	194.41	235.2	422.94	270.95	420.74	153.06	369.07	266.93	343.26	224.77	562.43	484.34	367.82	332.41	255.67	266.06	336.31	255.64	223.66	205.6	388.53	540.48	428.68	235.05	199.61	329.6	446.04	372.49	576.83	410.74	691.23	667.73	229.76	274.47	236.16	773.71	890.17	864.6	263.54	281.05	357.58	306.63	499.27	660.84	390.51	244.8	383.45	237.47
ERBB2	1308.83	681.53	773.95	1970.36	1042.06	3312.05	2411.53	6630.58	2869.24	1257.27	810.16	391.16	483.32	804.4	712.13	693.84	2024.41	2264.2	1615.17	1647.28	799.43	2495.1	4188.48	2071.35	1235.99	915.78	2164.64	1861.11	1628.78	4900.34	2235.36	972.21	1274.58	825.45	1167.79	944.65	1453.65	1743.08	1283.26	2699.29	1332.43	1343.31	1290.35	2529.54	1772.25	1301.32	4888.51	3132.88	3899.75
ESM1	81.02	78.85	156.41	111.43	117.06	93.27	115.68	114.84	106.55	88.58	56.94	190.05	114.5	111.49	103.8	105.23	62.6	122.1	92.96	154.76	106.43	121.35	232.98	146.9	138.09	110.34	209.24	160.92	126.98	319.67	126.15	121.39	92.82	51.06	65.56	44.28	147.37	255.32	162.64	227.05	132.9	138.88	162.13	231.25	308.22	133.29	193.89	214.33	102.22
ESR1	905.79	398.55	1866.52	4862.58	2432.84	453.9	368.4	979.62	516.29	541.56	453.53	2573.48	2347.72	681.45	878.99	840.17	1284.24	1579.8	1044.63	808.8	491.03	5691.67	8944.72	4392.15	3083.12	1953.93	6635.57	5386.54	9384.13	9602.46	4776.51	1535.31	1158.8	170.2	258.73	154.49	3324.85	3247.39	2734.4	2792.55	1742.99	8355.99	7482.5	2892.43	1531.95	1233.51	344.46	356.66	2139.34
EXO1	71.67	65.88	154.1	148.16	110.51	79.8	99.66	110.92	94.47	81.54	51.95	101.66	104.37	154.21	137.96	151.26	51.55	55.69	60.42	64.66	71.36	205.44	242.43	159.83	89.12	79.24	81.47	64.72	88.04	96.44	70.64	59.57	49.91	123.86	138.98	102.34	190.92	218.06	182.57	60.82	60.1	88.6	63.85	203.98	107.09	105.23	60.66	44.37	115.64
EXT1	301.24	250.58	622.17	1030.77	640.13	673.6	227.8	298.4	311.97	748.92	338.65	416.57	348.56	330.3	275.92	245.8	353.51	447.7	316.06	453.69	258.82	308.69	482.76	308.58	430.93	335.02	482.37	592.97	369.95	405.39	371.38	582.2	422.2	306.35	268.35	242.07	648.67	826.68	661.04	601.08	463.89	683.23	548.57	545.52	846.29	544.85	350.96	520.75	827.03
FGF18	21.81	16.2	50.98	70.91	68.76	160.63	28.48	49.08	47.23	41.27	56.94	18.78	25.33	46.89	47.3	53.44	36.82	55.69	53.45	42.4	59.26	40.45	79.76	48.97	84.23	53.16	37.03	58.6	49.1	33.93	54.5	44.96	41.92	21.75	19.23	23.62	43.54	46.92	114.37	38.52	50.79	66.25	37.8	47.44	97.95	83.01	44.41	88.75	57.82
FGFR4	109.07	58.32	95.01	93.71	89.23	127.47	121.02	153.13	135.11	86.57	101.89	108.29	125.64	126.08	151.1	129.89	52.47	49.27	46.48	408.11	208.02	136.25	140.63	106.25	72.47	78.24	56.48	50.73	59.26	62.5	51.47	39.34	59.89	281.77	613.61	473.31	68.1	106.27	101.78	65.89	82.96	72.63	65.53	149.42	96.64	94.71	126.74	262.05	176.56
FLT1	129.84	82.09	150.62	168.42	216.93	254.93	82.76	163.92	129.62	255.68	150.84	107.18	160.09	103.16	84.09	82.21	66.28	111.39	90.64	150.52	149.97	176.7	241.38	214.34	199.8	185.56	203.69	382.19	206.56	200.01	228.08	111.27	137.74	78.48	84.79	69.86	193.15	259.46	217.2	311.18	330.99	154.05	154.57	295.29	239	210.46	190.64	271.26	160.04
FOXA1	2085.82	935.35	2228.01	5460.28	2715.25	1806.29	1701.42	3814.42	1813.59	1740.44	1114.84	1492.82	1610.07	1903.68	2644.86	1875.17	2744.33	3865.42	2146.2	1967.4	1171.93	4569.73	6826.87	3450.71	2923.48	2028.16	5022.74	4381.65	2876.62	9098.85	3598.78	2949.23	2508.23	1429.64	1902.9	1424.85	3276.84	4296.27	2782.66	5303.31	2382.96	6501.05	4968.17	6194	3712.98	2818.94	6295.59	4584.62	3913.17
FOXC1	116.34	108.01	127.45	93.71	116.24	212.44	121.02	146.26	130.72	107.71	97.9	114.92	132.74	178.18	116.94	128.24	62.6	68.55	49.97	93.28	119.73	43.64	54.57	62.82	117.53	104.32	71.29	97.95	71.11	66.08	104.96	75.3	108.79	52	82.16	47.23	74.8	91.09	122.76	73.99	140.52	82.21	76.45	96.06	95.34	101.72	72.57	143.16	86.73
GAPDH	6526.5	3997.37	8069.73	15432.4	9883.61	10499.9	5593.67	13945.3	7357.63	9145.12	4574.25	4454.14	5134.17	17006	16104.4	12113.4	7818.7	10050.7	6827.87	9322.91	3908.86	12724.6	23169.4	14864.4	7446.31	5009.21	8753.92	12231	7260.96	8809.55	6814.07	23876	17904	8697	10500.5	7922.26	27148.1	33685.7	23191	11891.9	8476.22	14933.7	12269.2	20633.6	24137.7	15438.1	17201.3	18161.8	10989.9
GMPS	266.96	170.65	287.34	525.51	322.52	282.91	130.81	335.7	204.32	292.93	182.81	296.13	300.94	552.24	512.42	397.07	228.31	284.9	219.62	180.2	153.6	690.83	1038.99	569.11	395.67	234.71	699.94	556.23	466.46	433.96	340.1	459.69	522.01	315.81	342.64	231.24	951.23	1057.16	744.98	373.02	308.13	456.55	401.55	658.18	464.94	336.73	359.62	455.45	391.32
GNAZ	37.4	46.44	69.52	65.85	50.75	67.36	36.48	53.01	51.63	40.26	31.97	43.09	53.7	81.27	65.69	66.59	37.74	35.34	75.53	42.4	32.65	105.38	108.1	74.83	28.4	37.11	60.18	95.33	121.06	37.5	70.64	80.92	62.88	60.51	56.82	52.15	91.55	104.89	103.88	67.91	51.64	34.32	47.88	42.69	69.22	43.26	32.5	66.14	70.21
GPR126	24.93	44.28	50.98	102.57	72.85	77.72	40.93	53.01	45.04	84.56	55.94	24.31	21.28	87.53	59.13	51.79	25.78	32.13	31.37	27.56	22.98	137.32	372.57	154.29	61.7	49.15	48.14	91.83	49.95	46.43	65.6	46.08	54.9	77.53	83.91	71.83	126.16	186.31	155.29	55.75	55.87	38.31	49.56	86.57	96.64	79.51	62.83	94.61	50.59
GPR160	313.7	101.53	490.09	1127.01	536.17	603.13	404	1008.08	503.1	185.22	128.87	507.18	737.65	485.56	624.1	440.64	185.96	236.7	167.33	260.77	143.92	728.09	971.82	519.22	416.24	336.02	582.36	469.65	954.07	2093	821.48	856.45	690.69	521.93	754.34	636.65	1276.13	1246.24	885.58	701.43	273.43	837.27	617.45	654.62	476.69	333.22	619.59	537.5	1485.77
GPR180	83.1	61.56	176.11	230.47	134.25	172.03	109.45	190.43	116.44	111.73	76.92	98.34	110.45	129.2	122.19	92.9	131.65	194.93	98.77	129.32	61.68	405.56	653.83	315.05	170.41	123.37	170.36	254.5	211.64	176.8	158.44	251.76	253.52	103.06	105.77	91.51	266.84	336.75	266.51	195.63	149.83	219.5	193.22	236	333.03	201.1	203.64	214.33	176.56
GRB7	147.5	131.77	150.62	283.65	192.37	366.85	339.04	816.68	400.95	204.34	130.86	60.77	78.02	135.46	74.89	83.85	269.74	345.95	282.36	133.56	85.87	276.76	399.85	230.97	103.82	101.31	210.17	210.77	229.42	814.34	319.91	83.17	151.71	166.41	195.8	141.7	168.59	136.63	151.09	259.49	193.85	108.55	93.25	201.6	181.54	152	778.83	468.01	416.1
GSTM1	1272.48	571.36	86.9	79.78	69.58	51.82	85.43	60.86	67.01	38.25	30.97	116.02	195.56	70.85	77.52	74.81	1449.03	1813.29	1246.82	60.42	68.94	161.8	179.46	171.84	68.56	43.13	126.84	220.39	55.03	41.07	42.39	20.23	40.92	107.79	111.88	103.32	476.73	455.44	408.17	34.46	57.56	37.51	34.44	68.78	37.87	30.4	5817.9	2986.36	53.69
GSTM3	91.41	74.53	68.36	87.37	45.02	107.78	48.94	102.08	75.8	52.34	79.92	18.78	29.38	142.75	181.32	147.15	191.49	267.76	188.24	154.76	106.43	62.8	72.41	76.68	111.65	93.28	166.65	119.82	138.84	298.24	122.11	106.77	135.74	18.91	19.23	25.58	53.59	57.96	79.74	134.81	93.12	70.24	65.53	175.51	177.62	152	1422.25	802.89	441.91
GUSB	494.45	258.14	388.13	806.63	490.33	758.58	407.56	1138.63	573.41	427.81	283.71	245.3	417.46	319.89	361.32	217.03	197.93	273.12	225.43	377.37	262.45	752.57	904.65	628.24	563.15	605.84	428.67	718.03	537.57	1059	623.68	1368.97	1374.39	251.51	299.81	269.62	770.37	1061.3	816.33	692.31	457.97	1359.27	1076.13	837.25	736.59	495.74	462.53	929.31	773.34
HMBS	120.5	84.25	118.18	162.09	144.07	124.36	140.6	152.14	125.23	118.78	75.92	98.34	105.38	141.71	110.37	125.78	92.06	99.61	75.53	132.5	87.08	195.86	383.06	166.3	139.07	100.3	125.92	137.31	97.35	121.44	134.22	113.52	128.76	71.86	118.88	63.96	221.06	260.84	200.41	146.98	140.52	101.37	115.93	152.98	143.66	100.55	174.4	210.14	225.08
HOXB13	20.78	7.56	53.3	24.06	18.83	93.27	95.22	199.26	101.06	13.09	15.98	85.08	87.14	62.52	127.45	84.67	16.57	13.92	20.92	76.32	24.19	202.25	313.79	132.12	16.65	23.07	16.67	17.49	303.07	541.11	240.19	24.73	24.95	22.69	22.73	21.65	211.01	318.8	134.31	24.33	19.47	23.94	17.64	239.55	95.34	78.34	45.49	48.56	36.14
HRASLS	35.32	35.64	72.99	26.59	16.37	21.76	29.37	40.24	32.95	28.19	17.98	15.47	25.33	34.39	22.34	45.21	34.98	47.13	22.08	15.9	13.3	126.67	166.87	77.61	52.89	54.16	86.1	72.59	302.22	180.37	110	11.24	12.98	9.46	13.99	17.71	144.02	190.45	100.73	7.1	11	65.45	53.76	98.43	49.63	47.94	44.41	32.65	37.17
IGFBP5	1452.18	1045.52	8653.67	35018.2	16438	7148.47	4766.99	10888.7	5570.4	956.29	1689.25	2321.54	1630.33	991.96	1026.15	1090.08	2250.88	2069.27	1968.42	1631.38	1198.54	1470.02	1746.34	1456.04	5637.38	4013.19	5727.31	5632.3	1988.57	2464.46	2373.62	10131.2	8574.71	1725.59	1722.84	2382.29	7734.91	9862.25	7276.69	1415.03	1767.54	1392.8	2195.94	46625.2	14065.7	9374.64	5885.06	4526.85	24298.8
IL17R	139.19	110.17	243.31	419.14	312.7	265.3	104.11	263.06	179.05	234.54	171.82	143.65	164.15	275.08	265.41	191.54	146.38	248.48	191.73	177.02	164.48	307.63	335.83	302.11	209.59	139.42	188.87	328.84	275.13	253.59	257.34	263	355.32	230.71	204.54	203.69	323.78	391.95	354.65	327.4	297.98	255.41	278.9	642.76	521.1	429.1	179.81	298.89	230.25
IL6ST	2984.34	1487.27	8825.14	14848.6	10148	4157.68	1729.89	4762.63	2505.64	3072.2	2047.87	2496.13	2436.88	5740.22	6679.82	4759.03	2672.52	3219.58	2208.95	2258.91	1579.51	1546.66	2178.72	1787.72	4216.28	2864.7	9211.29	8815.77	1839.58	6929.06	3744.11	6044.58	5455.64	1895.79	1796.26	1563.59	3835.08	3762.17	3859.22	6826.79	4612.7	6204.13	5295.8	6896.06	6166.97	4760.98	6807.95	4814.02	6122.72
JHDM1D	182.82	171.73	217.82	239.33	207.92	607.28	180.64	455.45	358.11	354.33	203.79	204.42	234.06	283.42	293	194.01	157.42	221.71	181.27	153.7	145.13	230.99	442.88	314.12	259.54	215.65	161.1	305.23	246.35	505.39	359.27	361.91	442.16	275.15	297.19	249.94	455.52	502.36	435.45	362.88	349.61	217.9	236.06	353.4	364.38	256.05	370.46	423.63	588.52
KIF2C	84.14	43.2	106.59	211.47	103.14	74.61	43.6	109.94	57.12	17.11	17.98	43.09	64.85	102.11	109.05	69.88	35.9	31.06	37.18	25.44	20.56	215.02	242.43	169.07	47.99	44.13	62.03	49.85	81.27	103.58	65.6	58.45	61.88	59.57	91.78	51.17	244.51	287.06	171.03	45.61	27.94	69.44	67.21	148.24	92.73	68.98	69.33	61.12	139.39
KNTC2	36.36	21.6	105.43	119.03	81.04	41.45	43.6	59.88	37.35	30.2	21.98	23.2	34.45	104.2	84.09	60.83	22.09	32.13	25.56	36.04	24.19	139.44	163.72	132.12	43.09	41.12	36.11	55.97	49.1	37.5	24.22	35.97	66.87	66.19	76.92	42.31	101.6	140.77	89.19	36.49	29.63	54.28	38.64	125.71	61.38	67.81	29.25	46.05	67.11
KRT14	382.26	464.43	303.56	84.84	444.49	520.23	429.8	486.86	1364.31	320.1	579.4	107.18	203.66	677.28	127.45	175.1	465.83	429.49	356.73	385.85	343.48	30.87	66.12	561.72	47.99	345.05	79.62	336.71	340.32	192.87	964.79	249.52	928.24	166.41	68.18	132.84	131.74	52.44	277.01	152.04	1533.9	144.47	206.66	91.31	175.01	298.15	108.32	668.94	589.56
KRT17	470.56	902.95	633.76	35.46	926.64	1176.21	515.23	873.61	3748.02	2105.84	974.99	72.93	284.73	1169.09	122.19	338.7	1306.34	1399.86	960.97	1295.35	720.82	22.35	95.5	546.02	48.97	447.36	79.62	389.19	375.03	391.1	1375.53	452.95	1191.74	273.26	80.42	216.48	82.62	118.69	399.77	127.72	2217.89	335.23	352.83	55.74	335.64	403.37	202.56	1285.97	860.07
KRT5	548.46	939.67	437.96	130.43	550.91	577.23	393.32	664.53	1444.5	324.13	598.38	129.28	253.31	864.84	206.28	341.99	442.81	521.6	433.42	595.73	435.39	33	74.51	509.06	108.71	323.98	112.03	273.74	209.95	189.3	681.21	239.4	1080.95	205.18	114.51	215.5	94.9	126.97	292.75	137.85	1380.68	237.05	295.7	167.21	266.43	395.19	127.82	568.47	492.5
LGP2	127.77	119.89	215.5	317.84	263.58	227.99	166.4	333.74	183.45	147.97	94.9	278.45	253.31	284.46	241.76	177.57	133.49	204.57	159.19	130.38	71.36	422.59	452.33	361.24	193.92	144.44	187.95	271.12	409.74	444.67	291.66	285.48	321.39	430.22	385.48	345.39	179.75	277.4	237.14	251.38	151.53	217.1	245.3	341.54	519.79	347.25	471.19	351.63	274.64
LIN9	112.19	68.04	140.19	115.23	86.77	80.83	62.29	116.81	71.4	43.28	57.94	110.5	96.26	105.24	102.48	81.39	52.47	76.04	47.64	53	38.7	114.96	142.73	109.02	61.7	45.14	91.66	103.2	125.29	141.08	95.87	75.3	110.79	71.86	66.43	53.14	152.96	204.26	109.12	102.38	48.25	92.59	85.69	220.58	154.11	102.89	70.41	73.68	162.1
LOC100131053	15.58	17.28	34.76	27.86	27.01	33.16	29.37	42.21	31.86	16.11	24.97	25.41	27.36	43.76	43.36	40.28	25.78	19.28	15.11	13.78	13.3	22.35	24.14	18.48	11.75	24.07	33.33	34.11	20.32	25	34.31	37.09	35.93	16.07	25.35	17.71	40.19	30.36	33.58	31.42	31.32	15.96	23.52	29.65	32.65	35.08	24.91	20.93	36.14
LOC100288906	64.4	36.72	105.43	77.24	81.04	87.05	98.77	64.78	76.89	47.31	47.95	93.92	52.69	91.69	102.48	113.45	24.86	29.99	37.18	65.72	64.1	37.26	34.63	40.65	55.83	46.14	42.59	33.23	44.02	42.86	54.5	25.85	46.91	30.26	57.69	27.55	40.19	35.88	36.72	33.45	60.1	58.27	45.36	65.22	39.18	50.28	56.33	38.51	38.2
MAPT	866.32	475.23	71.83	392.55	110.51	225.92	290.1	646.86	237.27	846.57	472.51	392.26	353.63	734.59	819.87	633	1035.68	1384.87	797.13	1133.16	469.26	692.96	757.72	634.71	855.99	589.79	1633.2	1487.66	2104.55	3591.32	1384.61	731.69	707.66	57.68	98.77	48.22	2014.11	2031.52	1295.85	1455.57	795.73	1324.16	1139.13	1235.72	1185.86	826.62	3115.3	1943.19	1416.59
MCM6	232.68	108.01	265.32	355.83	224.29	323.33	133.48	357.3	173.56	170.12	110.88	164.64	180.36	431.38	340.3	209.63	155.58	200.29	145.25	142.04	120.94	417.27	522.64	346.46	286.96	199.61	332.38	321.85	500.32	439.32	342.12	178.71	261.5	329.04	334.78	265.68	616.29	859.81	657.89	299.02	185.39	331.24	292.34	569.24	498.9	330.88	244.8	339.91	341.76
MDM2	351.1	230.06	656.93	2597.18	1076.44	500.54	214.46	501.59	275.72	307.02	234.76	618.78	481.3	474.1	402.05	291.84	218.18	254.91	196.38	447.33	210.44	725.96	1030.59	679.06	337.89	254.77	805.49	812.49	610.37	1009	598.45	556.35	574.91	463.31	543.69	424.11	620.76	814.26	627.46	555.47	419.03	710.37	593.09	1080.36	1102.27	698.01	763.66	740.94	890.01
MELK	119.46	92.89	173.79	239.33	176.81	128.5	151.28	150.18	130.72	125.83	82.91	135.91	159.08	172.97	168.18	157.02	66.28	73.9	74.37	125.08	93.13	380.01	410.35	303.03	143.97	98.3	109.25	110.2	119.37	125.01	125.14	94.41	132.75	150.34	157.34	107.26	308.15	396.09	217.2	84.13	102.43	123.72	125.17	209.91	125.38	106.4	94.24	90.42	210.63
MGP	11209.2	7004.31	9482.07	6451.79	8457.63	37097.9	19388.3	46108.8	26996.3	3535.24	5963.81	2113.81	6244.7	5963.2	3171.73	4380.05	18526.3	22207.2	13170	12740.4	13883	19588.2	42066.3	20451.1	75731.4	45818.2	4950.53	17906.2	74118.1	42617.3	38377.6	19925.3	20835.4	12516.9	11849.2	9617.7	8698.43	3926.4	16139.9	45259.6	49959.2	21903.2	27521.5	20270.7	23399.8	20615.3	24909.4	24210.7	88688.5
MIA	103.88	127.45	110.07	86.11	81.86	137.83	117.46	168.83	151.59	58.38	90.91	68.51	78.02	204.23	93.29	105.23	114.16	111.39	102.26	103.88	71.36	72.38	64.02	94.24	73.45	93.28	50	90.96	110.05	82.15	150.37	77.55	323.39	61.46	83.91	52.15	54.71	73.15	79.74	99.34	207.4	88.6	80.65	64.04	88.81	94.71	59.58	159.91	143.52
MKI67	115.3	42.12	222.45	350.76	215.29	94.3	56.06	110.92	67.01	59.39	28.97	71.82	99.3	188.6	143.21	122.49	44.19	35.34	39.51	55.12	16.93	262.92	244.53	207.87	77.37	41.12	76.85	124.19	82.12	66.08	50.46	77.55	114.78	115.35	156.46	96.43	420.91	454.06	326.32	77.04	42.33	110.94	78.13	174.33	113.62	129.78	62.83	56.93	127
MLPH	154.77	92.89	405.51	823.09	447.77	327.47	213.57	479.01	263.64	183.2	167.83	158.01	147.94	257.37	218.11	188.26	104.95	121.03	89.47	152.64	100.38	386.4	423.99	318.74	197.84	132.4	514.77	509.88	282.75	1676.9	519.73	73.06	155.7	132.37	198.42	182.04	130.63	151.81	152.14	261.52	149.83	270.58	229.34	494.52	425.76	402.2	210.14	173.3	212.69
MMP11	882.94	664.25	163.36	265.92	251.31	963.77	1664.93	3236.27	1627.95	425.8	89.91	1792.26	728.53	309.47	813.3	877.98	4494.4	8121.77	4596.85	2047.97	655.51	757.9	1397.91	1009.81	1310.43	941.86	1815.59	3123.13	1588.15	2657.33	1734.8	2530	1977.24	149.39	166.95	110.21	4692.53	5644.64	3475.18	3595.34	863.45	2183.78	1494.48	7261.32	8694.1	4047.77	7756.84	6678.5	4692.71
MMP9	74.79	58.32	59.09	60.78	94.14	48.71	105.89	366.13	126.33	330.17	169.82	559.12	627.21	385.53	1081.33	336.23	742.01	839.7	725.08	209.88	35.07	257.6	462.82	359.39	1262.44	441.34	370.34	1157.07	843.18	164.3	808.36	128.13	436.17	739.41	762.21	665.19	280.23	1243.48	642.15	96.29	2272.06	85.4	191.54	69.97	1495.38	804.41	83.41	496.47	1224.54
MRPL19	198.4	131.77	244.47	444.47	256.22	284.99	156.62	381.83	248.26	209.38	107.89	215.47	177.32	274.04	279.86	204.7	182.28	221.71	166.17	204.58	116.1	413.01	616.05	364.93	230.16	167.51	351.82	414.55	312.38	621.47	275.51	473.18	432.18	191.94	182.69	185.98	600.66	684.53	512.04	338.55	225.17	393.5	322.59	626.16	505.43	336.73	465.78	396.01	323.17
MS4A7	150.62	110.17	411.31	777.51	486.24	1075.69	557.05	1433.11	662.38	267.76	171.82	277.35	394.16	239.65	403.36	346.1	241.2	515.18	250.99	151.58	125.78	397.04	418.74	412.98	1054.8	644.96	523.11	1188.56	295.45	500.04	383.49	348.42	430.18	245.84	202.79	186.96	320.43	447.15	446.99	904.16	523.15	727.13	888.79	569.24	707.86	549.52	931.56	1184.67	258.12
MTDH	448.74	260.3	695.17	1239.71	789.94	734.74	379.97	890.29	440.49	908.98	459.52	492.82	463.06	805.44	783.08	498.18	579.06	652.27	458.99	654.03	338.64	993.14	1603.61	826.88	584.7	383.16	649.02	798.49	720.42	1103.65	696.34	1145.3	972.15	560.7	553.3	498.89	1656.84	2017.72	1373.49	872.73	584.95	1101.47	915.68	1239.27	1217.2	840.65	990.05	1252.48	951.96
MYBL2	78.95	28.08	115.86	149.42	117.06	88.09	56.95	131.53	81.29	103.68	28.97	35.36	54.72	323.01	329.79	185.79	54.32	39.63	41.83	30.74	22.98	653.58	709.45	558.95	53.87	39.12	96.29	86.58	214.18	110.72	86.79	109.02	189.64	254.35	312.93	217.47	717.89	826.68	562.41	45.61	24.55	103.76	85.69	314.27	186.76	167.2	45.49	41.02	296.33
MYC	694.93	1008.79	1432.04	1589.2	1599.52	2189.73	259.84	524.16	1108.37	1346.85	783.19	562.43	673.82	1594.22	1225.86	838.52	382.97	367.37	562.4	598.91	445.07	855.83	1465.07	884.16	515.16	550.67	450.89	1015.39	949	458.96	944.6	241.65	1063.98	654.31	455.4	498.89	712.31	480.28	893.98	387.21	1255.39	594.63	934.16	1725.5	1445.75	1322.36	1639.97	1934.82	619.5
NAT1	71.67	52.92	126.29	144.36	88.41	210.37	258.95	495.7	252.65	131.87	143.85	111.6	131.72	86.48	107.74	109.34	37.74	54.62	30.21	93.28	73.77	55.35	67.17	45.27	233.1	149.45	749.01	570.23	294.6	635.76	351.2	246.14	234.55	55.79	95.28	57.07	43.54	53.82	59.81	625.41	342.84	276.16	265.46	915.52	381.35	354.27	256.72	177.49	84.66
NEK2	272.15	98.29	318.62	270.99	139.16	63.21	50.72	116.81	75.8	62.41	39.96	33.15	51.68	168.8	135.33	120.85	85.62	95.32	48.8	34.98	20.56	325.72	430.29	275.32	61.7	41.12	128.69	145.18	157.46	128.58	120.09	74.18	115.78	87.93	117.13	90.53	410.86	534.1	336.82	75.01	33.01	96.58	97.45	334.43	194.6	174.21	56.33	45.21	173.46
NMU	76.87	27	55.61	70.91	52.39	19.69	25.81	31.41	23.07	24.16	16.98	23.2	19.25	68.77	64.38	49.32	11.05	23.56	11.62	16.96	24.19	34.06	30.43	29.56	18.61	22.07	11.11	20.99	29.63	26.79	18.17	13.49	16.97	18.91	10.49	18.7	79.27	64.87	55.61	18.25	16.08	26.34	22.68	33.21	57.46	23.38	15.16	17.58	25.81
NUSAP1	103.88	44.28	317.46	479.93	268.5	138.87	106.78	266.99	103.26	83.55	41.96	55.25	96.26	161.51	149.78	93.72	64.44	92.11	48.8	78.44	30.24	518.39	543.63	399.12	122.42	89.27	137.03	155.68	190.48	262.52	155.42	104.53	160.69	170.2	163.46	133.83	389.65	554.8	320.03	163.19	63.49	232.27	151.21	412.7	216.8	197.59	87.74	98.79	234.38
OAZ1	1261.05	868.38	1734.44	2842.84	1871.29	3483.04	1706.76	4404.35	2159.62	2613.18	1445.5	1528.17	1993.08	2540.33	2728.95	1761.72	1485.86	1742.6	1382.77	2174.11	1259.01	4168.43	6474.25	3993.03	2954.82	1849.62	2088.72	3747.58	3486.99	4993.21	3119.42	5329.75	5443.66	1918.48	1892.41	1738.74	5199.41	6371.95	4756.34	4403.21	2782.52	5225.58	4659.87	2757.24	3070.43	2058.96	2885.66	3609.26	2951.91
ORC6L	70.64	50.76	107.75	136.76	90.86	117.1	105.89	131.53	108.75	61.4	30.97	68.51	83.09	123.99	137.96	118.38	40.51	34.27	39.51	69.96	52.01	208.63	265.52	146.9	90.1	66.2	62.03	56.85	152.38	123.22	106.97	61.82	82.84	153.18	164.33	107.26	271.3	328.47	232.94	42.57	47.41	84.61	93.25	101.99	74.44	63.14	74.74	61.95	305.62
OXCT1	146.46	106.93	239.83	272.25	228.39	218.66	77.42	190.43	121.93	117.77	102.89	124.86	171.24	383.45	247.01	189.9	289.99	312.75	195.21	134.62	78.61	145.83	144.83	180.16	215.47	180.55	161.1	295.61	165.08	226.8	230.1	583.33	417.21	206.13	195.8	201.72	355.04	391.95	355.7	176.37	184.54	320.06	304.11	662.92	504.12	252.55	168.98	260.38	210.63
PALM2	31.16	34.56	56.77	40.52	27.01	51.82	28.48	51.04	39.55	95.63	36.96	38.67	32.42	35.43	30.22	32.06	43.27	41.77	30.21	42.4	52.01	15.97	30.43	30.49	47.01	38.12	26.85	58.6	51.64	39.29	62.57	33.72	36.93	17.02	13.11	12.79	59.17	55.2	66.1	40.55	52.48	35.92	50.4	50.99	57.46	45.6	24.91	39.35	56.79
PECI	230.6	116.65	218.98	383.69	222.66	270.48	134.37	445.64	198.83	243.6	207.78	298.34	275.61	363.65	392.85	255.67	171.23	156.37	104.58	196.1	126.99	314.02	463.87	300.26	214.49	175.53	638.84	497.64	129.52	844.7	350.19	450.7	450.14	337.55	508.72	366.05	475.62	473.38	389.28	555.47	298.82	579.47	450.28	563.31	467.55	281.78	504.77	534.15	360.34
PGR	640.91	270.02	120.5	371.03	141.62	235.24	151.28	328.83	168.07	238.57	221.77	512.71	350.59	654.36	783.08	561.48	719.91	898.61	415.99	49.82	32.65	122.41	135.38	91.46	345.73	269.82	636.99	609.58	259.05	866.13	260.37	1575.77	982.13	69.02	62.93	44.28	1050.6	317.42	515.19	201.71	409.72	46.29	47.88	690.2	686.96	375.31	966.22	686.52	1882.24
PHGDH	222.29	178.21	183.06	267.19	164.54	391.73	319.46	782.32	469.05	78.52	159.83	56.35	134.76	564.75	207.59	224.43	91.14	128.53	94.12	89.04	116.1	424.72	534.19	475.8	200.78	155.47	183.32	336.71	491.01	571.47	369.36	950.86	943.21	397.12	371.49	294.22	846.29	1113.75	653.7	232.12	190.47	326.45	255.38	399.65	265.12	176.55	54.16	101.3	286
PITRM1	185.94	138.25	196.96	241.86	157.99	290.17	148.61	286.62	199.92	311.04	127.87	238.67	194.55	357.4	421.76	249.91	155.58	184.22	116.2	190.8	137.87	277.82	315.89	195.86	188.04	132.4	241.65	320.1	226.03	348.24	234.13	316.95	391.26	155.07	183.56	131.86	625.22	679.01	505.75	305.1	218.4	319.27	308.31	458.95	411.39	239.69	306.55	316.47	314.91
PRC1	136.08	60.48	229.41	358.36	168.63	100.52	56.95	159.02	83.48	78.52	43.95	45.3	63.84	159.42	145.84	106.87	66.28	48.2	60.42	54.06	43.54	472.62	433.44	337.22	98.92	43.13	112.95	118.94	177.78	187.51	124.13	64.06	115.78	90.77	104.89	85.61	330.48	416.79	223.49	97.31	67.72	129.3	105.01	253.78	144.97	132.12	71.49	80.37	139.39
PSMC4	367.72	223.58	673.15	1289.09	843.96	556.5	274.08	739.13	445.98	649.27	293.7	476.24	454.95	502.23	453.29	315.68	472.27	659.77	421.8	425.07	312.03	904.79	1747.39	929.43	635.63	477.45	820.3	1047.75	798.31	1173.3	825.52	814.86	801.48	470.87	564.66	429.03	1209.14	1242.1	995.76	745.02	579.02	1059.16	883.75	959.4	980.81	662.94	961.89	920.94	923.05
PTTG1	197.36	135.01	545.71	669.87	443.67	220.73	183.31	283.68	170.26	96.64	75.92	184.53	215.82	445.96	474.31	277.04	139.93	100.68	110.39	125.08	99.17	689.77	777.67	485.96	249.74	137.42	171.28	174.92	191.32	207.16	177.62	157.35	266.49	262.86	326.04	216.48	649.79	756.3	576.05	199.68	137.14	261	194.9	495.71	327.81	261.9	166.81	151.54	278.77
QSCN6L1	110.11	86.41	195.81	198.81	159.62	161.66	80.98	159.02	114.24	180.18	113.88	127.07	120.58	218.81	181.32	154.55	81.01	116.74	75.53	159	89.5	241.63	376.76	208.8	157.68	103.31	155.54	181.04	342.86	233.94	215.97	156.23	200.62	172.09	166.95	157.44	152.96	182.17	176.28	185.49	159.99	195.55	175.57	236	270.34	198.76	96.41	167.44	265.35
RAB6B	18.7	28.08	46.34	20.26	32.74	62.18	18.69	39.26	30.76	34.23	28.97	47.51	48.64	39.59	38.1	43.57	24.86	25.71	17.43	27.56	30.24	25.55	23.09	38.8	37.22	20.06	22.22	42.85	33.86	37.5	57.52	57.32	62.88	17.97	18.36	15.74	60.29	57.96	64.01	19.26	30.47	28.73	33.6	34.39	20.9	26.89	17.33	41.86	27.88
RACGAP1	46.74	28.08	104.28	106.37	69.58	67.36	85.43	55.95	60.42	48.32	46.95	37.57	70.93	81.27	95.91	85.5	33.14	32.13	23.24	60.42	56.84	44.71	61.92	51.74	42.11	62.19	56.48	46.35	50.79	58.93	44.4	42.71	46.91	43.49	48.08	27.55	63.64	56.58	52.46	39.53	53.33	47.89	36.12	62.85	60.08	59.63	55.24	43.54	66.08
RASSF7	120.5	82.09	54.45	108.9	60.58	138.87	140.6	316.07	168.07	85.56	48.95	120.44	112.47	85.44	49.93	37.82	79.17	100.68	68.56	82.68	42.33	106.45	167.92	105.32	100.88	84.26	388.86	334.09	108.36	342.88	180.65	101.16	144.73	41.6	59.44	49.2	206.55	259.46	203.56	271.65	121.05	136.49	105.01	269.2	122.76	153.17	176.56	218.51	358.28
RBBP8	247.22	173.89	439.11	819.29	473.14	517.12	339.04	1000.23	404.24	200.32	166.83	376.8	296.88	586.63	532.13	376.51	99.43	94.25	98.77	205.64	94.34	381.08	484.86	312.27	200.78	154.47	411.08	475.77	307.3	378.6	278.54	2087.17	1427.29	107.79	118.88	89.54	358.39	295.34	273.86	402.41	317.45	519.61	475.48	633.28	390.5	309.84	243.72	246.98	315.94
RECQL5	248.26	137.17	315.14	522.98	316.79	172.03	95.22	248.34	139.51	118.78	90.91	169.06	147.94	314.68	225.99	187.43	293.67	333.1	228.91	213.06	91.92	243.76	377.81	244.83	256.6	213.65	348.12	347.21	448.68	607.19	356.25	355.17	367.3	231.66	290.2	296.19	300.33	393.33	283.3	374.03	209.94	360.77	294.86	367.63	378.74	246.7	372.62	366.7	691.77
RFC4	159.97	91.81	205.07	258.32	212.01	192.75	185.09	274.84	160.38	161.06	113.88	173.48	199.61	342.81	317.96	240.87	104.03	151.02	89.47	166.42	116.1	344.89	461.77	291.95	237.01	163.5	256.46	206.4	375.87	219.66	149.36	152.86	171.67	167.36	188.8	140.71	520.28	632.09	433.35	176.37	159.99	187.57	154.57	311.89	261.2	198.76	239.39	218.51	213.73
RPL37A	12568.9	9010.01	9644.28	14086.3	9520.98	19098.2	10739.7	26728.4	14001.2	18631.5	13039.5	11966.8	12060.8	27501.8	19771.4	14639.6	11474.4	14075.7	11625.8	12569.8	7737.91	16139.4	23007.8	14279.6	13234.5	9006.35	11129.7	16654.6	17590.7	25901.8	14831.1	8589.19	14394.6	10614.5	11390.3	10085.1	27641.6	29532.9	22556.2	20399.3	15742.8	24771	23650.5	25920.4	26449.3	17357.9	21643.5	21934.3	19748.6
RPLP0	9148.32	6225.57	8169.37	12652.9	9754.27	12084.4	7650.14	18588.2	9720.47	13018.6	9116.53	3668.5	5135.19	28238.5	25343.6	22051.5	6035.49	6654.44	6121.38	6588.05	4066.09	6933.9	12192.9	8467.41	7305.28	4966.08	8361.36	10476.6	7224.56	9588.17	7365.09	9789.57	13211.9	6086.38	8125.58	6350.79	12920.9	14266.2	12560.8	11608.1	9698.6	13299	13685.6	26323.6	21801.2	15392.5	14900.6	16287.3	8846.45
RRM2	173.47	73.45	388.13	557.17	303.7	251.82	139.71	464.29	213.11	197.3	70.93	61.88	202.65	335.51	358.69	242.51	111.39	101.75	101.09	103.88	36.28	1308.22	1136.59	971	295.78	170.52	162.95	198.53	306.46	305.38	187.71	332.69	413.21	460.47	460.65	347.36	765.9	1106.85	695.67	220.97	106.66	391.9	287.3	635.65	299.08	270.09	150.57	160.75	467.72
RTN4RL1	65.44	39.96	97.32	146.89	100.69	83.94	80.98	192.39	94.47	128.85	64.93	69.61	81.06	97.95	115.62	73.99	82.85	130.67	69.72	77.38	47.17	355.53	470.17	255.92	50.93	36.11	202.76	199.4	103.28	223.23	116.06	49.45	75.86	34.98	34.96	26.57	310.38	262.22	209.85	82.1	64.34	332.04	244.46	124.52	117.54	65.48	177.65	165.77	117.7
RUNDC1	247.22	162.01	337.16	659.74	392.1	211.41	168.18	246.38	215.3	460.02	139.85	172.38	209.74	258.41	215.48	171.81	264.21	308.46	212.64	320.13	151.18	357.66	585.61	290.1	287.94	204.62	355.53	413.68	332.7	667.9	321.93	240.52	242.54	174.92	190.55	172.2	343.87	411.27	286.45	512.9	275.12	362.37	376.35	435.23	400.94	271.25	526.44	379.26	293.23
SDHA	211.91	147.97	250.26	292.51	231.66	373.07	216.24	489.81	291.1	211.39	194.8	407.73	451.91	444.92	365.26	365.83	263.29	339.52	228.91	248.05	189.88	443.88	628.64	486.89	383.92	295.9	497.18	583.35	397.88	455.39	415.79	381.02	495.06	203.29	226.39	224.35	474.5	538.24	417.61	458.16	369.08	474.11	428.44	602.44	433.59	307.5	433.28	612.85	430.55
SERF1A	266.96	203.05	282.7	501.45	296.33	279.8	196.66	388.71	236.17	236.56	151.84	240.88	244.19	409.49	429.64	337.88	284.47	409.14	245.18	419.77	182.62	258.66	447.08	323.36	339.85	265.81	198.13	246.63	464.76	1041.14	515.7	413.61	460.13	192.89	252.61	215.5	486.78	603.11	453.28	461.2	329.3	393.5	357.03	749.49	646.47	436.11	372.62	390.98	404.74
SF3A1	148.54	91.81	164.52	264.66	207.1	248.71	135.26	280.73	158.18	168.11	129.87	129.28	157.05	224.02	153.73	161.13	163.87	221.71	141.76	143.1	129.41	245.89	304.35	243.91	132.22	90.27	144.43	220.39	245.5	228.59	202.85	289.98	352.33	173.98	165.2	139.73	264.6	293.96	248.68	334.5	250.57	233.86	225.98	246.67	229.86	175.38	200.39	311.45	280.84
SFRP1	585.86	1211.85	166.84	21.53	178.45	574.12	320.35	425.02	953.48	311.04	1422.52	23.2	138.82	2109.99	157.67	522.84	68.12	21.42	173.14	75.26	326.54	29.8	30.43	303.96	96.96	379.15	89.81	366.45	426.67	48.22	694.32	38.21	1417.31	203.29	60.31	159.41	70.34	40.02	317.93	194.62	1237.61	51.08	225.98	137.57	163.25	314.51	46.58	920.1	195.14
SLC2A3	9.35	17.28	59.09	43.05	27.01	49.74	32.04	46.13	35.15	16.11	12.99	33.15	26.34	34.39	28.91	33.71	12.89	17.14	19.75	19.08	19.35	19.16	13.64	20.33	21.55	19.06	13.89	26.24	22.86	25	21.19	13.49	13.97	14.18	18.36	14.76	20.1	30.36	31.48	20.27	21.16	30.33	20.16	24.9	28.73	28.06	14.08	25.95	25.81
SLC39A6	1599.68	894.3	19197	48143.4	22731.3	2973.18	2291.39	7644.55	2452.91	1675.01	2022.9	1155.8	1225.03	1355.6	1187.76	939.64	2023.49	1756.52	1834.79	2669.14	1185.24	4591.02	7795.54	4169.5	4693.24	3083.36	5532.89	5532.6	4586.67	10854.3	6155.07	16443.3	10046.9	667.55	1319.88	1021.4	2295.47	2336.52	2093.29	11436.8	8407.65	6324.66	4347.36	19384.9	7044.61	6804.74	4953.5	4478.29	11174.7
STC2	3660.57	1738.93	1543.27	2271.74	2224.92	931.64	515.23	1369.3	999.62	235.55	337.65	1641.99	1250.36	581.42	572.86	609.98	4724.55	7012.17	3399.99	9560.35	3665.77	394.91	883.66	681.83	5791.14	4175.68	8874.28	9497.95	158.31	600.04	685.24	457.45	1333.47	268.53	260.48	170.23	1316.32	1022.66	1136.36	9909.24	4765.92	6796.37	6501.3	1393.44	3006.43	2477.53	12442.8	8540.48	8085.49
STK32B	191.13	118.81	271.12	473.6	301.24	214.52	176.19	149.2	168.07	109.72	92.9	154.7	158.07	178.18	198.4	173.46	86.54	91.04	83.66	217.3	169.32	58.55	49.33	60.05	139.07	109.33	169.43	134.69	67.72	146.44	144.31	65.19	76.85	69.02	81.29	46.25	107.18	189.07	175.23	619.33	286.97	402.28	396.51	182.63	239	174.21	328.21	373.4	98.09
TFRC	488.21	249.5	439.11	733.19	475.6	568.93	421.79	1003.18	486.63	816.37	346.64	453.04	504.6	711.67	939.43	521.2	445.57	585.86	364.87	352.99	194.72	1753.17	2582.77	1519.79	575.88	365.11	259.24	799.37	689.95	801.84	543.96	1748.86	1223.68	410.36	467.64	382.78	1412.34	1816.22	1322.08	604.12	639.97	949.02	764.46	1249.95	863.27	652.41	1489.41	1393.13	669.06
TGFB3	752.06	336.98	477.35	522.98	478.05	1265.34	628.24	1361.45	675.57	531.49	402.58	745.86	657.6	559.54	708.19	598.47	615.89	725.1	614.69	1351.53	874.41	646.13	928.79	609.76	780.57	562.71	788.83	561.48	751.75	1405.46	1029.38	753.04	756.56	403.74	434.42	312.91	1038.32	978.5	989.46	1130.2	773.72	817.32	833.35	1215.56	2508.84	1385.5	1091.87	1591.56	959.19
TMEM45B	27.01	11.88	64.88	75.98	49.93	54.92	45.38	52.02	39.55	111.73	19.98	66.3	37.49	25.01	39.42	30.42	34.06	36.42	33.7	46.64	33.86	28.74	30.43	24.02	58.76	45.14	21.29	34.11	21.16	30.36	23.21	24.73	25.95	26.47	24.47	24.6	40.19	63.48	36.72	50.68	28.78	35.12	32.76	24.9	36.57	29.23	278.38	308.93	96.02
TSPYL5	77.91	75.61	104.28	46.85	72.04	140.94	72.97	138.4	79.09	71.47	85.91	282.87	222.92	275.08	395.48	251.56	92.98	107.11	70.88	93.28	72.57	46.84	95.5	76.68	98.92	79.24	95.36	118.07	435.98	653.62	353.22	975.58	792.49	129.54	144.23	135.79	689.98	857.05	581.3	110.49	100.74	458.15	429.28	301.22	351.32	232.67	252.39	324.84	130.09
TYMS	334.48	113.41	551.5	733.19	527.17	264.26	155.73	361.22	175.76	181.19	102.89	128.18	182.39	495.98	412.56	279.51	124.28	112.46	98.77	178.08	52.01	1450.86	1625.65	1087.41	332.99	168.51	285.16	357.7	329.31	285.73	280.56	214.67	317.4	312.03	310.3	214.51	573.87	815.64	526.73	319.29	162.53	416.64	330.15	1086.29	411.39	484.05	188.48	260.38	533.8
UBC	21686.1	16937.8	35362	56289.5	40906.4	50576.1	18310.7	46486.7	31906.5	37411.9	16911.4	24058.5	25863.4	46838.7	34899.6	26665	21556	28190	22097.6	35802.3	22537.7	66645.9	101762	59076.9	30274	22726	47605.4	59399.8	54748	92379.7	55960.8	54157.3	52959.4	33913.4	29992.8	29451.4	103731	114444	106509	102377	52968.6	54329.5	52173.4	85558.6	92003.1	66702.8	60758.1	65951.2	39184.3
UBE2C	308.51	145.81	667.36	1196.65	638.5	225.92	174.41	390.67	190.04	155.02	143.85	262.98	353.63	432.42	325.84	275.4	168.47	182.08	140.6	124.02	66.52	1512.6	1883.82	1251.87	303.61	193.59	516.62	602.59	395.34	1107.22	583.31	564.22	662.74	441.56	481.63	352.28	1445.83	1781.72	1264.37	477.42	259.04	545.15	462.04	691.38	553.75	474.7	357.46	365.87	640.15
UBE2T	211.91	72.37	245.63	315.31	167.81	96.38	66.74	158.03	63.71	79.52	62.93	71.82	102.34	287.58	243.07	166.06	166.63	176.72	112.71	49.82	33.86	467.3	518.44	365.86	105.77	60.18	174.99	178.41	217.57	242.87	160.46	192.19	207.61	208.02	191.43	169.25	598.43	618.29	395.57	152.04	59.26	147.66	110.89	324.94	201.13	187.07	94.24	93.77	244.7
UCHL5	147.5	91.81	127.45	203.87	149.8	183.43	89.88	202.21	113.14	166.09	126.87	75.14	102.34	190.68	233.87	158.66	189.64	254.91	160.36	136.74	60.47	261.86	383.06	278.09	118.51	110.34	147.21	188.91	219.26	246.45	159.45	266.38	228.57	153.18	113.63	100.37	484.55	561.7	365.15	179.41	138.83	180.39	199.1	412.7	309.52	210.46	200.39	192.56	234.38
WISP1	194.25	105.85	205.07	119.03	163.72	245.61	258.06	411.28	230.68	198.3	124.87	258.56	191.51	136.5	173.43	192.37	157.42	314.89	171.98	377.37	214.07	210.76	309.6	198.64	410.36	237.72	141.66	182.79	246.35	433.96	317.9	295.6	227.57	106.85	118.88	78.72	245.62	397.47	341.01	533.17	230.25	377.53	307.47	384.23	1223.73	567.06	683.5	681.5	426.42
ZNF533	56.09	29.16	77.63	134.23	84.31	37.31	59.62	65.77	30.76	23.15	31.97	220.99	157.05	28.13	26.28	56.72	27.62	14.99	26.73	49.82	74.98	30.87	32.53	24.02	17.63	24.07	378.67	119.82	18.62	37.5	27.25	313.58	174.67	182.49	240.38	136.78	43.54	19.32	56.66	1035.93	515.53	1113.44	954.32	49.81	83.58	36.25	407.29	280.47	29.94
NEG_A	20	26	36	23	47	26	30	34	22	19	17	12	20	29	23	33	26	26	22	18	16	28	12	23	24	22	27	34	25	18	29	21	23	28	22	22	31	16	38	17	37	30	36	29	19	27	29	23	19
NEG_B	54	57	49	66	87	59	88	57	59	60	64	66	51	69	50	102	69	56	63	63	47	60	75	73	70	65	69	70	82	44	80	50	63	69	69	58	64	41	62	54	86	74	64	66	50	57	45	78	60
NEG_C	15	17	27	37	42	23	47	28	31	15	16	12	9	32	40	45	18	26	15	21	12	30	13	18	16	16	20	19	24	15	27	11	10	26	15	16	28	22	21	19	29	22	18	24	25	23	14	21	20
NEG_D	13	14	16	27	35	24	27	24	16	15	14	28	12	26	11	33	15	8	6	19	17	5	16	12	22	11	16	19	17	11	9	13	18	24	15	11	15	20	24	10	13	26	16	8	20	17	13	19	16
NEG_E	17	28	24	19	35	24	26	23	23	16	19	11	14	18	21	34	22	24	21	19	17	29	10	21	15	21	24	22	19	8	20	16	17	13	21	23	24	21	18	22	30	33	16	27	36	7	27	24	27
NEG_F	22	24	24	32	34	19	36	31	29	24	18	24	28	30	32	42	33	25	22	24	25	16	24	30	20	26	17	23	44	22	34	14	30	40	32	19	29	19	32	22	32	18	31	26	17	29	15	20	24
NEG_G	71	53	82	95	101	89	125	73	90	57	48	91	85	84	98	135	43	39	28	79	73	28	24	35	88	82	48	51	41	29	48	36	43	39	67	24	34	36	62	41	65	49	67	54	35	40	53	60	56
NEG_H	49	39	92	94	128	94	117	102	98	55	51	86	87	93	70	115	52	49	33	79	60	35	25	41	72	74	76	51	58	28	57	36	44	43	76	38	37	42	70	40	68	80	65	74	51	57	53	47	76
POS_A	32900	32111	29538	28110	43825	33245	42033	35165	29757	34458	34246	30570	36414	32271	24888	45191	40044	33079	29290	31457	28558	33167	37293	40529	32412	33475	40797	39312	41076	18041	35585	28761	33746	36987	43329	34935	32660	22759	32538	34371	44053	42686	41497	28919	26267	32033	29111	41049	33879
POS_B	12512	12051	12351	11695	16754	12655	15823	13260	12459	12477	12475	11015	13101	13368	11024	16989	15799	13841	12331	11821	10871	13520	14262	15526	12264	12766	14193	14396	16152	7839	14212	10700	12665	15880	15868	14352	13286	9418	13533	12186	15260	15076	15014	11713	11159	12569	11165	14663	12500
POS_C	4173	4199	3741	3491	5157	4108	4448	4186	3819	4281	4446	3812	4271	4150	3447	5489	4648	3958	3738	3978	3629	4130	3989	4664	4068	4380	4583	4809	4754	2314	4316	3665	4431	4885	4846	4312	3847	2834	4152	4117	4804	4892	5035	3500	3329	3865	3733	4923	4127
POS_D	565	553	517	528	724	591	673	671	596	586	581	532	586	627	486	819	694	562	530	575	487	595	605	702	591	566	640	642	770	362	581	531	594	635	759	637	546	425	604	594	725	749	735	512	518	586	524	709	587
POS_E	242	223	202	207	341	256	306	271	243	216	238	210	202	279	226	298	290	237	222	222	167	241	246	258	239	222	244	277	294	149	263	219	226	262	309	249	239	209	253	238	278	283	259	211	188	222	236	268	210
POS_F	69	64	93	62	114	99	106	101	89	84	78	78	78	80	60	101	89	88	82	76	71	83	76	97	101	85	78	94	122	56	91	77	81	94	92	103	76	86	86	77	85	118	97	90	68	62	84	105	78
[truncated: 132 more columns]

## Sheet: Counts (Normalized to HKGs)
5)	Nanostring counts normalized to housekeeping genes.
Gene Name	2_core	2_section	3_PR	3_core	3_section	5_Ki67	5_PR	5_core	5_section	6_core	6_section	7_core	7_section	8_Ki67	8_core	8_section	9_Ki67	9_core	9_section	10_core	10_section	12_Ki67	12_core	12_section	13_core	13_section	14_core	14_section	15_Ki67	15_core	15_section	16_core	16_section	18_Ki67	18_core	18_section	19_Ki67	19_core	19_section	20_core	20_section	21_core	21_section	22_Ki67	22_core	22_section	23_core	23_section	24_core
ACTB	15838.2	17817.7	19091.1	16709.8	19282.2	26703.7	19529.3	19076	23758.3	22199.6	17583	18545.7	18757.5	17010	19235.9	18450.7	27160.7	29156.8	32846.3	22456.5	22202.1	26102.3	25798.2	27223.1	21319.8	21656	26007.5	26323.5	21870.3	27374.5	26865.8	15316.9	16964.2	24793.7	22085	24570.2	30246.7	36557.5	31639.5	17676.5	18045	20703	20471.1	25728.8	33830.4	31922.6	19984.4	21959.3	17749
ACTR3B	186.44	236.08	301.82	235.99	222.57	169.02	191.5	176.77	211.2	109.84	135.48	164.2	145.35	206.64	174.96	180.98	254.88	304.17	239.58	228.89	177.15	127.86	139.29	126.07	136.1	154.56	131.24	118.83	316.57	418.6	360.36	175.64	173.56	284.26	266.48	242.99	170.17	158.97	139.64	220.93	166.36	80.59	106.6	235.79	190.94	175.44	143.07	156.46	255.01
AKAP2	108.88	245.81	331.63	257.44	356.82	469.15	237.32	195.54	281.6	273.55	316.73	169.5	235.67	217.93	164.12	189.9	188.99	156.89	246.63	137.89	293.57	154.78	133.79	233.02	187.42	307.53	169.17	351.13	360.02	120.21	317.11	125.79	172.89	347.24	215.18	343.6	120.38	124.85	218.33	164.2	383.9	93.65	127.03	128.54	220.08	281.49	107.3	174.77	159.06
ALDH4A1	90.98	85.18	98.74	64.36	85.97	122.43	227.5	208.05	179.06	76.04	93.37	157.14	234.26	100.5	88.25	95.59	109.23	123.27	101	155.81	134.13	188.43	167.39	197.37	62.47	117.91	112.78	163.82	127.25	74.95	108.11	104.43	143.41	328.52	334.88	282.85	63.16	75.22	105.69	105.24	95.55	93.11	83.62	136.2	129.64	132.24	135.29	165.35	145.23
ANLN	147.66	75.45	165.82	165.32	164.87	91.01	88.38	85.25	104.07	46.47	47.6	81.22	87.49	85.82	91.35	118.53	74.56	59.23	54.02	52.4	45.55	180.74	127.68	126.94	53.55	57.36	100.48	73.85	106.56	49.5	75.67	39.56	50.26	204.26	135.38	149.97	190.98	169.82	158.92	41.8	34.12	35.94	37.02	111.51	80.4	115.22	41.99	45	94.23
AP2B1	753.21	735	1265.04	1208.97	1106.95	901.46	928.02	1001.94	899.89	925.2	871.46	877.5	778.97	713.64	767.95	853.9	1558.73	1468.01	1388.17	1112.76	966.74	1973.71	1704.44	1670.25	722.89	701.1	893.03	772.09	1625.27	1643.29	1514.7	238.14	393.36	694.48	641.26	577.09	877.61	600.19	725.95	1018.06	839.46	643.6	794.08	721.85	745.67	841.86	1101.78	844.55	586.1
AURKA	138.71	121.69	292.51	167.84	194.31	121.35	196.41	102.46	137.74	81.33	115.34	190.68	152.41	199.86	178.05	216.66	128.3	118.47	124.49	102.04	159.44	201.89	162.5	122.6	123.83	119.51	86.12	79.89	130.35	101.82	115.31	76.74	73.04	165.11	166.73	144.27	150.85	158.19	136.55	49.26	77.63	75.14	68.94	89.38	91.45	89.03	58.32	49.71	186.72
AYTL2	286.37	277.45	393.11	349.57	354.46	339.13	237.32	219.79	252.52	346.42	285.61	363.71	351.39	306.01	357.65	346.66	435.2	441.84	420.44	278.53	291.03	586.44	536.38	537.33	274.43	240.61	182.5	198.73	387.95	181.02	312.31	310.14	297.54	434.05	441.76	387.26	487.48	393.92	459.8	149.28	289.21	166.62	187.67	266.44	384.89	341.72	146.18	174.25	235.13
AZGP1	4385.01	4957.62	12363.5	26868.7	21248.8	1989.29	2820.06	3298.35	3599.56	3316.37	5289.19	3940.78	5770.34	3710.48	3573.45	4583.04	2905.93	2931.21	2926.67	1907	3295.02	4580.96	5245.29	5309.85	4981.06	6673.21	8149	4227.68	1452.5	10360.4	6086.43	14502	9769.09	3266.45	5761.38	5622.87	5768.75	5946.87	5467.41	8100.45	7709.58	7483.06	6298.35	16057.9	5098.07	8612.38	7645.57	6012.31	10559.3
BAG1	132.74	175.23	363.3	533.81	432.18	213.45	212.77	220.57	202.02	163.71	250.82	190.68	228.61	215.67	213.66	259.99	107.5	115.26	122.14	257.85	194.87	269.19	246.2	254.75	118.25	121.1	231.72	136.96	228.63	316.78	300.3	144.78	137.38	194.05	206.63	187.94	84.71	73.67	117.26	70.91	106.64	94.74	107.24	109.81	80.4	113.91	77.75	66.98	241.18
BBC3	107.39	158.2	154.64	78.24	105.98	86.68	121.12	68.83	136.21	292.56	120.83	164.2	121.36	80.17	63.48	130	149.11	123.27	131.54	95.14	113.88	79.79	107.52	79.12	79.21	113.13	173.27	126.22	94.14	113.14	109.31	37.18	41.55	112.34	193.8	142.38	69.85	79.1	78.69	91.8	81.05	90.93	93.83	89.38	86.43	144.02	58.32	72.21	101.14
BCL2	287.86	372.37	696.8	672.63	647.69	382.47	402.63	441.14	430.05	167.93	272.79	891.62	675.96	369.24	365.4	321.17	674.47	438.64	556.68	468.82	382.14	528.76	509.5	438.21	401.61	481.21	352.7	363.89	410.71	789.12	557.35	208.87	240.58	279.16	296.41	261.97	216.24	170.6	236.84	575.46	432.53	454.11	515.77	607.79	501.47	500.14	572.27	391.92	809.13
BIRC5	271.45	160.63	802.99	796.31	747.78	86.68	160.4	126.71	128.56	76.04	69.57	162.43	160.88	257.45	252.37	231.96	194.19	132.87	164.42	133.75	91.11	620.09	434.97	513.86	127.18	138.63	184.55	140.99	353.81	164.05	206.6	129.75	162.17	592.35	628.44	603.67	286.84	291.57	239.93	86.58	81.9	135.58	108.52	317.51	175.86	248.76	81.64	74.3	500.52
BLVRA	539.92	545.17	1436.45	2044.4	1616.86	688.02	779.08	789.98	635.13	247.14	344.19	1214.72	1003.35	584.91	639.44	720.08	374.51	357	441.58	584.65	445.41	1074.82	1118.58	943.37	325.75	360.11	1137.05	978.2	946.61	958.82	793.99	712.05	664.09	641.72	669.76	668.21	1686.86	1661.77	1388.65	440.36	523.81	595.68	497.89	767.82	599.95	646.78	471.19	374.66	452.11
BUB1B	82.03	58.41	227.3	205.7	196.66	54.17	68.74	103.24	79.58	36.97	42.11	49.44	84.67	118.56	97.54	98.14	78.02	86.45	61.07	67.57	75.92	273.03	155.17	193.89	85.9	60.55	87.15	91.98	160.35	125.86	106.91	41.14	54.28	132.77	165.3	155.66	122.61	138.03	102.61	49.26	43.51	67.52	50.43	144.71	89.44	130.93	48.21	42.38	108.92
C16orf61	264	265.28	419.2	365.97	339.15	413.89	276.61	294.09	329.04	273.55	267.3	607.36	493.91	416.67	472.23	382.34	400.52	334.58	303	386.09	450.47	536.45	507.67	448.65	334.67	344.18	246.07	257.14	410.71	260.21	348.35	253.17	264.7	561.71	511.58	476.48	749.8	742.87	696.64	213.46	245.7	303.29	313.42	291.98	330.63	363.98	192.83	226.05	323.31
C20orf46	23.86	41.37	91.29	23.98	57.7	84.51	50.74	31.29	45.91	20.07	32.95	40.61	29.63	37.26	34.06	47.16	31.21	27.21	46.98	24.82	40.49	49.99	54.37	47.82	39.05	43.02	35.89	24.84	41.38	18.38	49.25	10.29	18.09	69.79	49.88	56.95	18.58	24.04	29.32	24.63	33.27	13.07	18.51	22.13	16.08	35.35	16.33	21.45	29.39
C9orf30	314.71	367.5	367.03	234.73	263.78	379.22	407.54	296.44	329.04	520.69	411.93	287.79	222.97	207.77	198.18	252.35	388.38	389.01	380.51	368.16	412.51	272.07	341.5	284.32	325.75	325.06	301.44	255.12	473.82	131.52	344.74	196.21	178.25	268.94	282.16	294.24	373.78	386.17	362.59	240.33	293.47	148.1	183.84	253.67	383.89	328.63	229.37	232.85	227.35
CALM2	4602.76	3509.52	4395.04	4447.19	3597.6	8689.6	10461.9	11162.1	8545.89	4468.65	3820.89	3515.28	3687.43	4301.04	4719.18	3769.92	4717.8	4536.89	4162.16	4446.9	3548.09	4163.72	4330.14	3746.54	3498.45	3073.69	3693.09	3329.37	3550.56	10151.1	5414.97	5046.03	4198.34	5361.82	4833.69	4764.82	5090.29	5268.36	4434.41	5665.02	4090.68	4323.33	3981.87	5842.08	5160.38	4849.53	4514.41	3363.02	3906.47
CCNB1	384.81	245.81	739.65	706.71	599.4	212.36	297.88	326.94	273.95	103.5	128.16	250.71	283.65	538.62	538.8	474.11	350.24	265.75	256.02	151.68	88.58	601.82	439.86	424.3	211.96	178.46	313.74	249.75	196.56	149.9	180.18	149.53	189.65	517.46	491.63	457.5	690.35	573.05	522.29	148.53	104.93	218.34	186.39	543.09	285.4	358.74	131.4	130.29	388.14
CCNE1	41.76	21.9	104.33	71.93	70.66	41.17	54.01	39.89	48.97	24.29	20.14	49.44	49.39	39.52	55.74	47.16	53.75	36.82	54.02	31.71	43.02	104.79	78.2	76.51	56.89	38.24	36.91	27.53	55.87	43.84	40.84	28.48	37.53	74.9	49.88	79.73	63.16	82.2	67.12	20.9	28.15	24.5	32.55	32.35	47.23	35.35	31.88	27.21	64.83
CCNE2	144.68	163.06	253.38	262.49	223.75	92.1	207.86	94.64	177.53	120.4	87.88	174.79	146.76	164.86	187.34	173.33	112.7	104.06	129.19	115.83	159.44	213.43	186.94	147.81	142.79	143.41	131.24	54.38	143.8	145.66	124.92	56.96	71.03	207.66	239.4	184.14	111.47	138.03	118.81	46.28	74.22	67.52	68.94	104.7	63.31	78.56	83.97	77.44	84.72
CD68	207.32	265.28	592.46	471.98	648.86	686.93	430.46	466.95	416.28	459.43	432.07	642.67	866.47	337.62	562.03	484.3	424.79	331.38	509.7	260.61	445.41	808.52	554.1	780.78	1054.22	597.53	402.94	1223.25	410.71	376.17	515.31	356.02	455.69	857.89	652.66	677.71	452.55	591.66	614.86	532.17	743.06	367.54	481.94	460.52	576.84	695.22	226.26	506.52	430.5
CDC20	304.27	231.21	538.43	381.12	350.93	153.86	292.97	177.55	192.83	99.28	151.96	254.24	255.42	378.28	315.85	368.33	124.84	97.65	133.88	151.68	187.27	384.55	309.12	327.79	147.26	162.53	156.87	92.65	152.08	107.48	127.33	126.59	166.86	260.43	279.31	222.11	316.56	380.74	313.99	91.8	92.99	141.57	111.71	223.88	157.78	197.7	68.42	73.78	314.66
CDC42BPA	319.18	491.62	380.07	272.59	309.71	589.42	425.55	424.71	521.87	450.98	552.9	256.01	239.9	179.54	120.77	200.09	873.86	1027.76	991.22	472.96	493.49	220.16	289.57	306.05	306.78	302.75	261.45	273.25	493.48	199.4	493.69	350.48	253.98	141.28	115.43	136.68	521.66	663	637.23	235.11	243.99	173.7	157.03	555.86	758.73	598.34	337.45	323.9	203.15
CDC6	104.4	65.71	273.87	233.47	191.95	186.36	214.41	215.87	185.18	62.31	78.72	51.2	84.67	154.7	156.38	127.45	107.5	100.86	133.88	56.53	78.45	427.81	365.33	323.44	85.9	97.2	87.15	80.57	230.7	118.79	147.75	59.34	70.36	280.86	296.41	197.43	135.25	142.68	118.03	62.7	52.04	62.07	49.15	179.61	90.44	113.91	56.76	39.24	167.7
CDCA1	37.29	34.07	117.37	65.62	41.22	39.01	47.46	25.81	35.2	16.9	21.97	24.72	28.22	53.07	49.55	48.43	29.48	46.43	23.49	19.3	20.25	67.3	53.76	53.91	21.2	39.84	43.06	26.86	48.62	39.6	31.23	15.03	18.76	73.19	65.55	56.95	46.07	62.81	43.2	23.88	19.62	14.16	17.87	58.74	43.21	53.68	14.77	14.13	31.12
CDCA7	82.03	99.79	158.36	85.81	126	110.52	145.67	89.17	130.09	45.42	89.71	144.78	115.72	147.92	170.31	149.11	79.76	52.83	54.02	129.61	139.19	150.94	98.97	105.21	99.29	103.57	85.1	38.94	193.46	56.57	120.12	30.06	43.56	194.05	186.68	138.58	92.15	113.21	127.29	40.3	81.05	43.02	40.21	78.31	58.29	82.48	31.88	31.92	58.78
CDH3	275.93	365.07	149.05	64.36	120.12	866.79	1170.25	1206.08	1075.89	406.63	362.5	139.48	136.89	425.7	280.24	277.84	423.06	275.35	389.91	455.03	437.82	62.49	50.71	86.95	32.35	100.38	54.34	57.74	265.88	643.46	434.83	48.26	210.42	182.13	102.6	151.87	679.2	793.28	651.12	39.56	285.79	60.98	84.26	71.5	163.81	153.18	47.43	123.49	133.99
CEGP1	1989.66	1513.81	1907.81	3139.79	2305.76	485.4	1628.53	1588.56	1481.45	100.34	175.76	1333.02	819.9	207.77	188.89	377.25	419.59	408.22	535.54	336.45	323.93	1754.51	1110.03	1232.91	558.9	564.07	7721.45	4223.65	186.22	612.34	1258.85	154.28	396.04	566.82	491.63	404.35	1085.68	1274.83	776.87	5834.45	3407.33	1787.59	1943.7	1789.31	3430.87	2732.45	2624.98	1532.12	1270.75
CENPA	107.39	43.81	305.55	205.7	177.82	72.59	104.75	57.88	74.99	21.12	32.95	49.44	46.57	92.59	119.22	123.62	55.48	41.62	54.02	42.75	20.25	172.09	115.46	139.98	34.58	20.71	57.42	42.3	52.76	46.67	49.25	45.1	49.59	112.34	135.38	113.9	147.14	116.32	102.61	26.12	24.74	50.09	40.21	69.8	36.18	61.54	20.22	26.16	45.82
CENPF	551.85	284.75	409.88	400.05	337.97	108.35	142.39	146.26	96.42	83.44	87.88	310.74	268.13	269.87	252.37	256.17	263.54	172.9	194.95	91.01	53.15	410.51	417.25	385.17	145.03	137.03	197.88	134.95	233.81	86.27	144.14	67.25	87.79	400.01	505.88	381.57	424.31	396.25	310.13	94.79	62.28	144.29	106.6	243.46	222.09	256.62	53.65	52.85	165.98
CEP55	104.4	75.45	385.66	282.68	214.33	71.51	78.56	88.38	76.52	35.91	38.45	75.92	73.38	112.92	94.45	84.12	72.82	40.02	68.12	56.53	63.27	202.85	162.5	151.29	92.59	89.23	66.64	66.47	98.28	49.5	85.28	56.96	69.69	170.22	161.03	132.88	263.8	293.12	232.21	49.26	41.8	77.86	56.81	123.43	90.44	144.02	48.21	39.24	87.31
COL4A2	1118.62	1465.14	1535.19	739.52	1569.76	2431.35	1073.69	1037.14	1077.42	962.17	1120.45	1262.39	1514.2	860.43	698.28	890.86	1413.09	1416.78	1726.41	1147.23	1601.95	1021.94	847.33	1438.1	1441.33	1693.8	2165.41	1793.26	1778.38	780.63	1567.55	455.71	706.98	1065.56	860.72	975.74	797.35	1308.17	1291.44	1152.41	1551.81	460.65	813.23	1216.43	1608.91	1804.17	687.35	1055.42	829.88
CTSL2	13.42	29.21	98.74	46.69	49.46	17.34	31.1	16.43	53.56	14.79	23.8	19.42	18.35	21.45	15.48	22.94	26.01	22.41	28.19	17.93	10.12	16.34	15.27	12.17	23.43	15.93	14.35	19.47	24.83	28.28	24.02	13.45	18.09	20.43	18.53	24.68	20.06	17.06	20.83	17.91	31.57	14.16	14.04	23.83	31.15	15.71	15.55	14.13	21.61
CXXC5	887.44	781.25	532.84	725.63	712.45	751.94	783.99	887.75	723.89	577.72	757.95	836.89	757.81	677.51	639.44	734.1	1439.09	1402.37	1237.84	737.7	569.42	1859.3	1844.95	1850.23	856.76	709.07	1143.2	866.08	1546.64	1128.52	1029.42	626.6	520.69	794.91	883.52	806.79	663.6	553.67	621.03	486.64	557.94	721.46	701.52	1014.68	924.55	1208.46	730.89	587.63	1177.39
DCK	393.76	404.01	657.67	707.97	737.18	411.73	289.7	327.72	267.82	195.39	346.02	510.25	479.8	625.57	613.12	500.87	241	296.16	364.07	395.74	354.3	595.09	387.32	569.5	403.84	369.67	534.18	441.1	488.31	472.34	520.12	232.6	325.68	714.91	729.61	740.35	586.31	562.97	631.06	357.52	273.85	290.22	346.61	402.64	519.56	580.01	261.25	330.7	330.22
DHCR7	85.02	124.12	134.14	123.67	80.08	125.68	132.57	100.9	99.48	53.86	91.54	97.11	69.15	123.08	131.6	214.11	67.62	76.84	96.3	99.28	93.64	195.16	142.95	180.85	45.74	81.26	96.38	61.77	74.49	52.33	72.07	736.57	451.66	62.98	101.18	117.7	159.03	155.86	156.61	63.44	44.36	62.07	49.79	65.55	53.26	92.96	52.87	62.27	121.89
DIAPH3	41.76	36.51	139.73	94.65	74.19	22.75	45.83	26.59	29.08	25.35	18.31	28.25	25.4	50.81	35.61	43.33	34.68	30.42	28.19	17.93	17.72	145.17	86.75	90.42	24.54	25.49	21.53	24.17	46.55	16.97	37.24	22.94	12.06	32.34	45.6	36.07	52.76	52.73	40.12	16.42	18.77	22.32	22.98	45.12	27.13	49.75	21.77	14.65	18.15
DTL	190.91	97.35	260.83	175.41	202.55	99.68	173.49	88.38	140.8	84.49	86.05	97.11	108.66	140.02	181.15	172.06	131.77	94.45	108.05	84.11	88.58	174.97	158.84	166.07	100.4	124.29	106.63	71.17	201.74	117.38	121.32	36.39	58.3	238.3	245.1	212.61	155.31	194.64	152.75	38.07	59.72	63.16	42.13	170.25	82.41	117.83	41.21	33.49	82.12
EBF4	141.69	211.74	342.81	392.47	334.44	180.94	229.14	251.85	223.44	99.28	140.97	559.69	412.07	106.14	92.9	170.78	322.5	368.2	303	464.68	409.98	186.51	191.22	199.11	98.17	146.59	140.46	96.01	321.74	151.32	210.21	41.14	101.19	272.35	363.38	366.38	103.29	137.25	158.15	161.96	162.09	90.39	93.83	120.03	266.31	261.85	207.6	209.83	179.81
ECT2	703.99	598.71	1071.28	1090.35	959.75	727.02	926.38	772.77	728.48	360.15	371.65	563.22	557.42	800.59	880.98	893.41	487.21	480.26	448.63	392.98	387.2	1015.21	808.85	894.68	547.75	543.35	750.51	469.97	947.64	415.77	518.91	291.15	354.5	668.95	785.19	736.55	1047.78	954.57	786.13	348.56	311.39	394.76	315.33	527.77	299.47	420.28	286.14	250.12	1734.1
EGFR	304.27	703.36	326.04	55.53	316.78	704.27	333.89	232.3	477.49	295.73	607.83	95.34	230.02	429.09	145.54	249.8	277.42	214.52	281.86	176.5	404.92	56.72	54.98	215.63	216.42	350.55	128.16	262.51	250.36	70.71	338.74	74.37	232.53	253.62	78.38	182.24	158.28	174.47	256.13	105.99	318.21	47.37	114.9	200.89	337.66	430.75	168.73	193.08	165.98
EGLN1	328.13	438.08	378.21	421.5	389.79	439.9	281.52	294.09	371.89	360.15	411.93	898.68	674.55	398.6	391.72	396.36	501.08	502.68	516.75	290.94	430.22	350.9	314.62	403.43	267.74	317.09	365	342.4	455.2	456.78	488.88	486.56	448.31	413.63	447.46	455.6	514.97	500.16	635.69	194.06	283.23	243.94	232.99	358.37	508.5	437.3	175.72	239.66	198.82
ERBB2	1879.29	1535.72	1244.55	1963.63	1499.1	3462.84	4435.5	5283.46	3997.47	1319.16	1484.78	625.02	673.14	871.73	839.17	1075.66	3812.73	3384.26	3264.9	2142.78	1672.82	2253.47	2438.15	1949.35	1407.86	1454.78	2397.13	1428.7	1990.46	3880.54	2660.64	684.35	855.75	1485.99	1903.83	1822.4	967.53	979.38	943.51	1987.61	1342.8	916.39	980.47	1815.7	1363.71	1457.22	3509.05	1958.05	3265.04
ESM1	116.34	177.67	251.52	111.05	168.4	97.51	212.77	91.51	148.45	92.94	104.36	303.68	159.46	120.82	122.31	163.13	117.9	182.5	187.91	201.32	222.7	109.6	135.62	138.25	157.3	175.28	231.72	123.53	155.18	253.14	150.15	85.45	62.32	91.92	106.88	85.43	98.09	143.46	119.58	167.19	133.94	94.74	123.2	165.99	237.17	149.26	139.18	133.96	85.58
ESR1	1300.59	898.07	3001.44	4845.98	3499.86	474.57	677.6	780.59	719.3	568.22	831.19	4112.04	3269.72	738.48	1035.8	1302.52	2418.72	2361.3	2111.62	1052.09	1027.48	5140.48	5206.8	4133.46	3511.84	3103.96	7348.25	4135.03	11467.9	7604.1	5685.23	1080.73	778.02	306.39	421.81	298.04	2212.98	1824.62	2010.45	2056.27	1756.56	5700.37	5685.56	2076.18	1178.8	1381.28	247.26	222.91	1791.15
EXO1	102.91	148.46	247.79	147.65	158.98	83.43	183.31	88.38	131.62	85.55	95.2	162.43	145.35	167.12	162.57	234.5	97.1	83.25	122.14	84.11	149.31	185.55	141.12	150.42	101.52	125.88	90.23	49.68	107.59	76.37	84.08	41.93	33.51	222.98	226.58	197.43	127.07	122.52	134.24	44.78	60.57	60.44	48.51	146.41	82.41	117.83	43.54	27.73	96.82
EXT1	432.53	564.64	1000.48	1027.25	920.89	704.27	419	237.78	434.64	785.79	620.64	665.63	485.45	357.95	325.14	381.07	665.8	669.17	638.89	590.16	541.58	278.8	281.02	290.4	490.85	532.2	534.18	455.2	452.1	321.02	442.04	409.82	283.46	551.5	437.48	466.99	431.75	464.49	486.03	442.6	467.51	466.09	416.83	391.57	651.2	610.12	251.92	325.47	692.43
FGF18	31.32	36.51	81.98	70.67	98.92	167.94	52.37	39.11	65.81	43.3	104.36	30.01	35.28	50.81	55.74	82.84	69.35	83.25	108.05	55.16	124.01	36.53	46.43	46.08	95.94	84.45	41.01	44.98	60	26.87	64.86	31.65	28.15	39.15	31.35	45.56	28.98	26.37	84.09	28.36	51.19	45.19	28.72	34.05	75.37	92.96	31.88	55.47	48.41
FGFR4	156.61	131.42	152.77	93.39	128.36	133.27	222.59	122.02	188.24	90.83	186.74	173.03	174.99	136.63	178.05	201.37	98.83	73.64	93.95	530.87	435.29	123.06	81.86	99.99	82.55	124.29	62.54	38.94	72.42	49.5	61.26	27.69	40.21	507.25	1000.37	913.1	45.33	59.71	74.83	48.51	83.61	49.55	49.79	107.26	74.37	106.05	90.97	163.78	147.82
FLT1	186.44	184.97	242.2	167.84	312.07	266.54	152.21	130.62	180.59	268.27	276.45	171.26	222.97	111.79	99.09	127.45	124.84	166.49	183.21	195.8	313.81	159.59	140.51	201.72	227.58	294.78	225.56	293.39	252.43	158.39	271.47	78.32	92.48	141.28	138.23	134.78	128.56	145.78	159.69	229.14	333.57	105.09	117.45	211.96	183.9	235.67	136.85	169.54	133.99
FOXA1	2994.93	2107.66	3582.73	5441.63	3906.14	1888.53	3129.4	3039.45	2526.73	1826.12	2043.18	2385.3	2242.37	2063.01	3116.7	2907.09	5168.6	5777.58	4338.33	2559.21	2452.28	4127.19	3973.98	3247.47	3330	3221.88	5562.2	3363.61	3515.38	7205.3	4283.44	2076.01	1684.03	2573.67	3102.28	2748.79	2181.02	2413.95	2045.94	3905.06	2401.51	4434.95	3775.05	4446.04	2857.05	3156.65	4519.07	2865.39	3276.28
FOXC1	167.05	243.38	204.94	93.39	167.22	222.12	222.59	116.54	182.12	113.01	179.42	183.62	184.87	193.09	137.8	198.82	117.9	102.46	101	121.34	250.54	39.42	31.77	59.12	133.87	165.71	78.95	75.19	86.9	52.33	124.92	53.01	73.04	93.62	133.95	91.12	49.79	51.18	90.26	54.49	141.62	56.08	58.09	68.95	73.36	113.91	52.1	89.48	72.61
GAPDH	9371.09	9007.44	12976.5	15379.7	14218.5	10977.9	10288.4	11112.1	10250.8	9595.3	8383.25	7117.07	7150.48	18429.3	18977.4	18779.5	14725.6	15022.7	13801.9	12127.3	8179.33	11492.3	13487.1	13988.9	8481.74	7957.5	9694.11	9389.25	8873.29	6976.2	8110.44	16806.6	12020.7	15656.5	17118.8	15283.5	18069.4	18927	17051	8756.52	8542.22	10187.6	9322.73	14810.8	18573.3	17287.6	12347.4	11351.2	9201.25
GMPS	383.32	384.54	462.05	523.72	463.98	295.79	240.6	267.5	284.66	307.35	335.04	473.18	419.12	598.47	603.83	615.57	429.99	425.83	443.93	234.41	321.4	623.93	604.8	535.59	450.69	372.86	775.12	427	570.03	343.65	404.8	323.58	350.48	568.52	558.61	446.11	633.13	593.99	547.74	274.67	310.53	311.45	305.12	472.44	357.76	377.07	258.14	284.66	327.63
GNAZ	53.69	104.65	111.79	65.62	73.01	70.43	67.11	42.24	71.93	42.25	58.59	68.86	74.79	88.08	77.41	103.23	71.09	52.83	152.68	55.16	68.33	95.18	62.92	70.43	32.35	58.96	66.64	73.18	147.94	29.7	84.08	56.96	42.22	108.94	92.63	100.61	60.93	58.93	76.38	50.01	52.04	23.41	36.38	30.64	53.26	48.44	23.33	41.34	58.78
GPR126	35.8	99.79	81.98	102.22	104.81	81.26	75.29	42.24	62.75	88.72	102.53	38.84	29.63	94.85	69.67	80.29	48.55	48.03	63.42	35.85	48.08	124.02	216.87	145.2	70.28	78.08	53.32	70.49	61.04	36.77	78.08	32.44	36.86	139.58	136.8	138.58	83.97	104.68	114.18	41.05	56.31	26.14	37.66	62.14	74.37	89.03	45.1	59.13	42.36
GPR160	450.43	228.78	788.09	1123.16	771.34	630.59	743.07	803.27	700.93	194.34	236.17	810.4	1027.34	526.2	735.44	683.12	350.24	353.79	338.23	339.21	301.16	657.58	565.7	488.64	474.12	533.79	644.91	360.53	1165.93	1657.43	977.77	602.86	463.73	939.6	1229.8	1228.22	849.37	700.22	651.12	516.49	275.56	571.18	469.17	469.89	366.8	373.14	444.75	335.94	1243.95
GPR180	119.32	138.73	283.19	229.68	193.13	179.86	201.32	151.74	162.22	117.23	140.97	157.14	153.82	140.02	143.99	144.02	247.94	291.36	199.65	168.22	129.07	366.28	380.6	296.49	194.11	195.99	188.65	195.37	258.64	140	188.59	177.22	170.21	185.54	172.43	176.55	177.6	189.21	195.95	144.05	151	149.74	146.81	169.4	256.26	225.19	146.18	133.96	147.82
GRB7	211.79	296.92	242.2	282.68	276.74	383.56	623.59	650.75	558.6	214.4	239.84	97.11	108.66	146.79	88.25	130	508.02	517.08	570.77	173.74	179.68	249.96	232.76	217.37	118.25	160.93	232.74	161.8	280.36	644.87	380.78	58.55	101.86	299.58	319.21	273.36	112.21	76.77	111.09	191.07	195.36	74.05	70.85	144.71	139.69	170.21	559.05	292.5	348.38
GSTM1	1827.09	1287.47	139.73	79.5	100.1	54.17	157.12	48.49	93.36	40.13	56.75	185.39	272.36	76.78	91.35	115.98	2729.08	2710.29	2520.32	78.6	144.25	146.13	104.47	161.72	78.09	68.52	140.46	169.19	67.25	32.53	50.45	14.24	27.48	194.05	182.4	199.33	317.31	255.9	300.1	25.38	58.01	25.59	26.17	49.37	29.14	34.04	4176.18	1866.48	44.95
GSTM3	131.25	167.93	109.92	87.08	64.77	112.68	90.02	81.34	105.6	54.92	146.46	30.01	40.92	154.7	213.66	228.13	360.64	400.22	380.51	201.32	222.7	56.72	42.15	72.17	127.18	148.19	184.55	91.98	169.67	236.17	145.34	75.16	91.14	34.04	31.35	49.36	35.67	32.57	58.63	99.27	93.84	47.92	49.79	125.98	136.67	170.21	1020.91	501.81	369.99
GUSB	709.95	581.67	624.14	803.88	705.39	793.12	749.62	907.3	798.88	448.87	519.95	391.96	581.41	346.66	425.78	336.46	372.78	408.22	455.68	490.88	549.17	679.69	526.61	591.24	641.46	962.42	474.71	551.2	656.94	838.61	742.34	963.63	922.76	452.78	488.78	520.14	512.74	596.32	600.2	509.78	461.53	927.28	817.69	600.98	566.79	555.13	332.01	580.82	647.48
HMBS	173.01	189.84	190.04	161.53	207.26	130.02	258.6	121.23	174.47	124.63	139.14	157.14	146.76	153.57	130.06	195	173.38	148.88	152.68	172.36	182.21	176.89	222.98	156.5	158.41	159.34	139.44	105.41	118.97	96.16	159.76	79.91	86.45	129.36	193.8	123.39	147.14	146.56	147.35	108.22	141.62	69.15	88.09	109.81	110.54	112.6	125.18	131.34	188.45
HOXB13	29.83	17.04	85.7	23.98	27.09	97.51	175.13	158.78	140.8	13.73	29.29	135.95	121.36	67.75	150.18	131.27	31.21	20.81	42.28	99.28	50.61	182.66	182.66	124.33	18.96	36.65	18.46	13.43	370.37	428.5	285.88	17.41	16.75	40.85	37.05	41.76	140.45	179.13	98.75	17.91	19.62	16.33	13.4	171.95	73.36	87.72	32.66	30.35	30.26
HRASLS	50.71	80.31	117.37	26.5	23.55	22.75	54.01	32.07	45.91	29.57	32.95	24.72	35.28	37.26	26.32	70.1	65.89	70.44	44.63	20.68	27.84	114.4	97.13	73.04	60.24	86.04	95.35	55.72	369.33	142.83	130.93	7.91	8.71	17.02	22.8	34.17	95.86	107.01	74.06	5.22	11.09	44.65	40.85	70.65	38.19	53.68	31.88	20.41	31.12
IGFBP5	2085.12	2355.9	13915.5	34898.6	23647.6	7473.92	8767.9	8676.45	7760.78	1003.36	3095.89	3709.49	2270.6	1074.98	1209.21	1689.96	4239.26	3092.9	3978.95	2122.1	2507.96	1327.66	1016.56	1370.28	6421.27	6375.24	6342.44	4323.69	2430.15	1951.58	2825.2	7131.53	5757.05	3106.45	2808.73	4595.87	5148.25	5541.31	5350.14	1041.95	1781.3	950.15	1668.58	33467.5	10823.2	10497.7	4224.38	2829.29	20344.1
IL17R	199.86	248.25	391.25	417.71	449.85	277.37	191.5	209.62	249.46	246.09	314.9	229.53	228.61	298.1	312.75	296.95	275.68	371.4	387.56	230.27	344.18	277.84	195.49	284.32	238.73	221.48	209.16	252.44	336.23	200.82	306.3	185.13	238.56	415.33	333.46	392.96	215.5	220.23	260.76	241.08	300.3	174.24	211.92	461.37	400.97	480.5	129.07	186.81	192.77
IL6ST	4285.08	3351.32	14191.2	14797.9	14598.8	4346.97	3181.78	3795.02	3490.9	3223.43	3753.15	3988.45	3393.9	6220.65	7871.5	7377.98	5033.36	4812.25	4465.17	2938.4	3305.14	1396.88	1268.25	1682.42	4802.57	4550.78	10200.6	6767.51	2248.07	5487.06	4456.42	4254.87	3662.91	3412.84	2928.43	3016.46	2552.58	2113.86	2837.47	5026.86	4648.61	4232.4	4024	4949.98	4745.34	5331.35	4886.85	3008.77	5126.22
JHDM1D	262.5	386.97	350.26	238.51	299.11	634.93	332.25	362.92	498.92	371.77	373.48	326.63	325.98	307.14	345.27	300.78	296.49	331.38	366.42	199.94	303.69	208.62	257.8	295.62	295.63	342.58	178.4	234.31	301.05	400.22	427.62	254.75	296.87	495.33	484.51	482.18	303.19	282.26	320.16	267.2	352.34	148.65	179.37	253.67	280.38	286.73	265.92	264.77	492.74
KIF2C	120.81	97.35	171.4	210.75	148.38	78.01	80.2	87.6	79.58	17.95	32.95	68.86	90.32	110.66	128.51	108.33	67.62	46.43	75.16	33.09	43.02	194.2	141.12	159.11	54.66	70.11	68.69	38.27	99.32	82.02	78.08	41.14	41.55	107.24	149.63	98.71	162.74	161.29	125.75	33.59	28.15	47.37	51.07	106.41	71.35	77.25	49.76	38.2	116.7
KNTC2	52.2	48.68	169.54	118.63	116.58	43.34	80.2	47.71	52.03	31.69	40.28	37.08	47.98	112.92	99.09	94.31	41.61	48.03	51.67	46.88	50.61	125.94	95.3	124.33	49.09	65.33	39.99	42.97	60	29.7	28.83	25.32	44.9	119.15	125.4	81.63	67.62	79.1	65.57	26.87	29.86	37.03	29.36	90.23	47.23	75.94	20.99	28.78	56.19
KRT14	548.87	1046.53	488.13	84.55	639.44	543.91	790.53	387.95	1900.79	335.86	1061.87	171.26	283.65	733.97	150.18	271.46	877.33	641.95	721.1	501.91	718.73	27.88	38.49	528.64	54.66	548.13	88.17	258.48	415.89	152.73	1148.34	175.64	623.22	299.58	111.15	256.28	87.69	29.47	203.67	111.96	1545.84	98.55	157.03	65.55	134.66	333.86	77.75	418.09	493.6
KRT17	675.65	2034.64	1019.11	35.34	1333.06	1229.76	947.66	696.12	5221.81	2209.51	1786.86	116.53	396.54	1266.94	143.99	525.09	2460.33	2092.35	1942.5	1684.99	1508.32	20.19	55.59	513.86	55.78	710.66	88.17	298.76	458.3	309.71	1637.22	318.84	800.13	491.93	131.1	417.63	54.99	66.69	293.93	94.04	2235.16	228.69	268.1	40.01	258.27	451.7	145.4	803.73	720.09
KRT5	787.51	2117.39	704.25	129.98	792.53	603.5	723.43	529.52	2012.51	340.09	1096.65	206.57	352.8	937.22	243.08	530.18	833.98	779.63	876.12	774.93	911.06	29.8	43.37	479.08	123.83	514.67	124.06	210.14	256.57	149.9	810.8	168.52	725.75	369.37	186.68	415.74	63.16	71.34	215.24	101.51	1391.43	161.72	224.69	120.03	205.01	442.53	91.75	355.3	412.34
LGP2	183.45	270.15	346.54	316.76	379.19	238.37	306.07	265.93	255.58	155.26	173.93	444.93	352.8	308.27	284.89	275.29	251.41	305.77	321.79	169.6	149.31	381.67	263.3	339.96	220.88	229.45	208.13	208.13	500.72	352.13	347.14	200.95	215.78	774.49	628.44	666.32	119.64	155.86	174.35	185.1	152.71	148.1	186.39	245.16	399.97	388.85	338.23	219.77	229.94
LIN9	161.08	153.33	225.43	114.84	124.83	84.51	114.57	93.08	99.48	45.42	106.19	176.56	134.06	114.05	120.77	126.17	98.83	113.66	96.3	68.94	80.98	103.83	83.08	102.6	70.28	71.7	101.5	79.22	153.11	111.72	114.11	53.01	74.38	129.36	108.3	102.51	101.81	114.77	80.23	75.38	48.63	63.16	65.11	158.33	118.58	115.22	50.54	46.05	135.72
LOC100131053	22.37	38.94	55.89	27.76	38.86	34.67	54.01	33.63	44.38	16.9	45.77	40.61	38.1	47.43	51.09	62.45	48.55	28.82	30.54	17.93	27.84	20.19	14.05	17.39	13.39	38.24	36.91	26.18	24.83	19.8	40.84	26.11	24.12	28.94	41.33	34.17	26.75	17.06	24.69	23.14	31.57	10.89	17.87	21.28	25.12	39.28	17.88	13.08	30.26
LOC100288906	92.47	82.75	169.54	76.98	116.58	91.01	181.68	51.62	107.13	49.64	87.88	150.07	73.38	99.37	120.77	175.88	46.81	44.82	75.16	85.49	134.13	33.65	20.16	38.26	63.59	73.3	47.16	25.51	53.8	33.94	64.86	18.2	31.5	54.47	94.05	53.15	26.75	20.16	27	24.63	60.57	39.75	34.47	46.82	30.15	56.3	40.43	24.07	31.98
MAPT	1243.91	1070.87	115.51	391.21	158.98	236.2	533.57	515.44	330.57	888.24	865.97	626.78	492.5	796.07	966.13	981.35	1950.58	2069.94	1611.31	1474.03	981.92	625.86	441.08	597.33	975.02	936.93	1808.61	1142.02	2571.88	2843.94	1648.03	515.05	475.12	103.83	161.03	93.02	1340.57	1141.45	952.77	1071.8	801.93	903.33	865.57	887	912.49	925.65	2236.21	1214.5	1186.03
MCM6	334.1	243.38	426.65	354.61	322.67	338.05	245.51	284.7	241.81	178.49	203.22	263.07	251.19	467.48	401.01	324.99	293.02	299.36	293.61	184.77	253.07	376.86	304.23	326.05	326.86	317.09	368.08	247.07	611.42	347.89	407.2	125.79	175.57	592.35	545.78	512.55	410.2	483.1	483.71	220.18	186.83	225.97	222.14	408.6	383.89	370.52	175.72	212.45	286.13
MDM2	504.13	518.4	1056.37	2588.31	1548.56	523.33	394.45	399.68	384.14	322.13	430.24	988.73	670.31	513.78	473.78	452.44	410.92	381.01	396.96	581.89	440.35	655.66	599.92	639.06	384.87	404.73	892	623.71	745.91	799.02	712.31	391.62	385.99	834.06	886.37	818.18	413.17	457.51	461.34	409.02	422.29	484.6	450.66	775.48	848.17	781.63	548.17	463.09	745.16
MELK	171.52	209.31	279.46	238.51	254.36	134.35	278.24	119.67	182.12	132.02	151.96	217.17	221.56	187.44	198.18	243.43	124.84	110.46	150.33	162.71	194.87	343.21	238.87	285.19	163.99	156.15	120.98	84.59	145.87	98.99	148.95	66.46	89.13	270.64	256.5	206.92	205.1	222.55	159.69	61.95	103.23	84.4	95.11	150.67	96.47	119.14	67.65	56.51	176.35
MGP	16094.8	15783.1	15247.6	6429.76	12167.1	38786.8	35660.8	36740.9	37611.7	3709.27	10929.9	3377.56	8697.14	6462.29	3737.57	6790.44	34891.9	33192.6	26621.9	16572.8	29050.3	17691.3	24487.2	19246.6	86262.1	72785.4	5482.22	13745.8	90576.5	33748.2	45678.9	14025.7	13988.9	22533.3	19317.7	18554.3	5789.55	2206.13	11866.8	33326.6	50348.2	14942.2	20912.2	14550.3	18005.6	23085	17880.3	15131.8	74254.1
MIA	149.15	287.19	176.99	85.81	117.76	144.1	216.05	134.53	211.2	61.26	166.6	109.47	108.66	221.32	109.93	163.13	215	166.49	206.7	135.13	149.31	65.37	37.27	88.69	83.67	148.19	55.37	69.82	134.49	65.05	178.98	54.59	217.12	110.64	136.8	100.61	36.41	41.1	58.63	73.15	209.01	60.44	61.28	45.97	68.34	106.05	42.76	99.94	120.16
MKI67	165.56	94.92	357.71	349.57	309.71	98.6	103.11	88.38	93.36	62.31	53.09	114.76	138.3	204.38	168.76	189.9	83.22	52.83	79.86	71.7	35.43	237.46	142.34	195.63	88.13	65.33	85.1	95.34	100.35	52.33	60.06	54.59	77.06	207.66	255.08	186.04	280.15	255.12	239.93	56.72	42.66	75.69	59.36	125.13	87.43	145.33	45.1	35.58	106.33
MLPH	222.23	209.31	652.08	820.28	644.15	342.38	392.81	381.69	367.3	192.22	307.58	252.48	206.03	278.91	257.02	291.86	197.66	180.9	180.86	198.56	210.05	348.98	246.81	299.97	225.35	210.33	570.06	391.41	345.54	1327.92	618.61	51.43	104.54	238.3	323.48	351.19	86.94	85.3	111.86	192.57	151	184.59	174.26	354.97	327.61	450.39	150.84	108.32	178.08
MMP11	1267.77	1496.78	262.7	265.01	361.53	1007.65	3062.3	2578.76	2268.09	446.76	164.77	2863.78	1014.64	335.37	958.39	1361.15	8464.64	12139.5	9292.06	2664	1371.66	684.5	813.73	950.33	1492.64	1496.21	2010.59	2397.5	1940.81	2104.32	2064.85	1780.9	1327.52	268.94	272.18	212.61	3123.28	3171.56	2555.11	2647.41	870.18	1489.75	1135.58	5212.16	6689.9	4532.69	5567.98	4174.08	3928.95
MMP9	107.39	131.42	95.02	60.57	135.43	50.92	194.77	291.74	176	346.42	311.24	893.39	873.52	417.8	1274.24	521.26	1397.48	1255.09	1465.68	273.02	73.39	232.65	269.41	338.22	1437.98	701.1	410.12	888.24	1030.41	130.11	962.15	90.19	292.84	1331.09	1242.62	1283.27	186.52	698.67	472.14	70.91	2289.76	58.26	145.54	50.22	1150.66	900.78	59.87	310.3	1025.24
MRPL19	284.88	296.92	393.11	442.95	368.59	297.96	288.06	304.26	345.88	219.68	197.73	344.29	246.96	296.97	329.79	317.35	343.3	331.38	335.89	266.12	242.95	373.01	358.61	343.44	262.16	266.1	389.61	318.23	381.75	492.14	327.92	333.08	290.16	345.54	297.83	358.79	399.79	384.62	376.48	249.29	226.93	268.44	245.12	449.46	388.91	377.07	334.34	247.5	270.57
MS4A7	216.27	248.25	661.4	774.85	699.5	1124.66	1024.59	1141.95	922.85	280.94	314.9	443.16	548.95	259.71	475.32	536.56	454.27	770.02	507.35	197.18	263.2	358.59	243.75	388.65	1201.48	1024.56	579.29	912.41	361.06	395.97	456.45	245.26	288.82	442.56	330.61	360.68	213.27	251.24	328.65	665.77	527.22	496.04	675.35	408.6	544.68	615.36	668.69	740.42	216.11
MTDH	644.33	586.54	1117.86	1235.47	1136.39	768.2	698.88	709.41	613.7	953.72	842.17	787.45	644.91	872.86	922.78	772.34	1090.59	974.94	927.8	850.77	708.61	896.96	933.47	778.18	666	608.68	718.73	612.97	880.4	873.97	828.82	806.19	652.7	1009.38	902.04	962.46	1102.77	1133.7	1009.85	642.63	589.5	751.41	695.77	889.55	936.61	941.36	710.67	782.8	797.03
MYBL2	113.35	63.28	186.31	148.91	168.4	92.1	104.75	104.81	113.25	108.79	53.09	56.5	76.2	350.05	388.62	288.03	102.3	59.23	84.56	39.99	48.08	590.29	412.98	526.03	61.36	62.14	106.63	66.47	261.74	87.68	103.3	76.74	127.32	457.88	510.16	419.53	477.82	464.49	413.51	33.59	24.74	70.78	65.11	225.58	143.71	187.23	32.66	25.64	248.1
MYC	997.81	2273.16	2302.78	1583.78	2301.05	2289.42	477.92	417.67	1544.2	1413.15	1435.35	898.68	938.44	1727.64	1444.55	1299.97	721.28	549.1	1136.84	779.07	931.31	772.95	852.83	832.08	586.79	874.78	499.32	779.47	1159.72	363.45	1124.31	170.1	714.35	1177.9	742.44	962.46	474.1	269.85	657.29	285.12	1265.17	405.65	709.82	1238.56	1112.47	1480.78	1177.2	1209.26	518.67
NAT1	102.91	119.26	203.08	143.86	127.18	219.95	476.28	394.99	352	138.36	263.64	178.32	183.45	93.72	126.96	169.51	71.09	81.64	61.07	121.34	154.37	49.99	39.1	42.6	265.51	237.42	829.46	437.74	360.02	503.45	418.01	173.26	157.48	100.43	155.33	110.1	28.98	30.24	43.97	460.52	345.51	188.4	201.71	657.16	293.44	396.71	184.28	110.93	70.89
NEK2	390.77	221.47	512.35	270.06	200.19	66.09	93.29	93.08	105.6	65.48	73.23	52.97	71.97	182.93	159.47	187.35	161.25	142.48	98.65	45.5	43.02	294.18	250.47	259.1	70.28	65.33	142.52	111.45	192.43	101.82	142.94	52.22	77.73	158.3	190.95	174.65	273.46	300.1	247.64	55.23	33.27	65.88	74.05	240.05	149.74	195.08	40.43	28.26	145.23
NMU	110.37	60.84	89.43	70.67	75.37	20.59	47.46	25.03	32.14	25.35	31.12	37.08	26.81	74.53	75.87	76.47	20.81	35.22	23.49	22.06	50.61	30.76	17.72	27.82	21.2	35.06	12.3	16.11	36.21	21.21	21.62	9.49	11.39	34.04	17.1	36.07	52.76	36.45	40.89	13.43	16.21	17.97	17.23	23.83	44.22	26.19	10.89	10.99	21.61
NUSAP1	149.15	99.79	510.49	478.29	386.26	145.19	196.41	212.75	143.86	87.66	76.89	88.28	134.06	175.02	176.5	145.29	121.37	137.68	98.65	102.04	63.27	468.19	316.45	375.61	139.45	141.81	151.74	119.51	232.77	207.89	184.98	73.58	107.89	306.39	266.48	258.17	259.34	311.73	235.3	120.17	63.98	158.45	114.9	296.23	166.82	221.27	62.98	61.75	196.23
OAZ1	1810.68	1956.76	2789.05	2833.13	2692.02	3641.61	3139.22	3509.53	3008.81	2741.82	2649.17	2441.8	2775.8	2752.94	3215.79	2731.22	2798.43	2604.63	2795.13	2828.09	2634.49	3764.75	3768.71	3757.85	3365.7	2938.25	2313.05	2876.86	4261.29	3954.08	3712.88	3751.69	3654.87	3453.69	3085.18	3354.36	3460.65	3580.22	3497.07	3242.27	2804.18	3564.84	3540.79	1979.14	2362.62	2305.62	2071.37	2255.79	2471.48
ORC6L	101.42	114.39	173.27	136.29	130.71	122.43	194.77	104.81	151.51	64.43	56.75	109.47	115.72	134.37	162.57	183.53	76.29	51.23	79.86	91.01	108.82	188.43	154.56	138.25	102.63	105.17	68.69	43.64	186.22	97.58	127.33	43.51	55.62	275.75	267.9	206.92	180.58	184.56	171.27	31.35	47.77	57.72	70.85	73.21	57.28	70.7	53.65	38.72	255.88
OXCT1	210.3	240.94	385.66	271.32	328.55	228.62	142.39	151.74	169.88	123.57	188.57	199.51	238.49	415.54	291.08	294.41	546.16	467.46	394.61	175.12	164.5	131.71	84.31	169.55	245.43	286.81	178.4	226.93	201.74	179.6	273.87	410.61	280.11	371.07	319.21	389.16	236.31	220.23	261.53	129.87	185.98	218.34	231.07	475.84	387.91	282.8	121.3	162.74	176.35
PALM2	44.74	77.88	91.29	40.38	38.86	54.17	52.37	40.67	55.1	100.34	67.74	61.8	45.16	38.39	35.61	49.7	81.49	62.43	61.07	55.16	108.82	14.42	17.72	28.69	53.55	60.55	29.73	44.98	63.11	31.11	74.47	23.73	24.79	30.64	21.38	24.68	39.38	31.02	48.6	29.86	52.89	24.5	38.3	36.6	44.22	51.06	17.88	24.59	47.55
PECI	331.11	262.85	352.12	382.38	320.31	282.79	247.14	355.1	277.01	255.59	380.81	476.71	383.84	394.08	462.94	396.36	322.5	233.73	211.4	255.09	265.73	283.61	270.02	282.58	244.31	278.85	707.45	382.02	158.29	668.91	416.81	317.26	302.23	607.67	829.37	706.18	316.56	265.98	286.22	409.02	301.15	395.31	342.14	404.34	359.77	315.53	362.33	333.84	301.69
PGR	920.25	608.45	193.76	369.76	203.73	245.95	278.24	262.02	234.15	250.31	406.44	819.23	488.27	709.12	922.78	870.47	1355.87	1343.14	840.89	64.81	68.33	110.56	78.81	86.08	393.8	428.63	705.4	467.95	316.57	685.88	309.91	1109.21	659.4	124.26	102.6	85.43	699.26	178.35	378.79	148.53	412.91	31.58	36.38	495.42	528.6	420.28	693.57	429.08	1575.9
PHGDH	319.18	401.57	294.37	266.28	236.7	409.56	587.58	623.38	653.49	82.38	292.93	90.04	187.69	612.02	244.63	347.93	171.65	192.11	190.26	115.83	242.95	383.59	310.95	447.78	228.69	246.98	203.01	258.48	600.04	452.54	439.64	669.32	633.27	714.91	605.64	567.6	563.28	625.78	480.63	170.92	191.95	222.7	194.05	286.87	204	197.7	38.88	63.31	239.45
PITRM1	266.98	311.52	316.73	241.04	227.28	303.38	273.33	228.39	278.54	326.36	234.34	381.37	270.95	387.31	497	387.44	293.02	275.35	234.89	248.2	288.5	250.92	183.88	184.33	214.19	210.33	267.6	245.73	276.22	275.77	278.68	223.11	262.69	279.16	299.26	254.38	416.14	381.52	371.85	224.66	220.1	217.8	234.27	329.43	316.56	268.4	220.04	197.79	263.66
PRC1	195.39	136.29	368.89	357.14	242.59	105.1	104.75	126.71	116.31	82.38	80.56	72.39	88.9	172.76	171.86	165.68	124.84	72.04	122.14	70.32	91.11	426.85	252.31	317.36	112.67	68.52	125.09	91.31	217.25	148.49	147.75	45.1	77.73	163.41	171	165.16	219.96	234.18	164.32	71.65	68.25	88.21	79.79	182.17	111.55	147.95	51.32	50.23	116.7
PSMC4	527.99	503.79	1082.46	1284.69	1214.12	581.83	504.11	588.96	621.35	681.23	538.26	760.97	633.62	544.26	534.16	489.4	889.46	986.14	852.63	552.93	652.93	817.17	1017.17	874.69	724.01	758.46	908.41	804.31	975.58	929.12	982.57	573.59	538.11	847.68	920.57	827.67	804.79	697.9	732.12	548.59	583.53	722.55	671.52	688.66	754.71	742.36	690.46	575.59	772.82
PTTG1	283.38	304.22	877.52	667.58	638.27	230.78	337.16	226.04	237.22	101.39	139.14	294.85	300.58	483.29	558.93	429.5	263.54	150.48	223.14	162.71	207.52	622.97	452.69	457.34	284.47	218.3	189.68	134.28	233.81	164.05	211.41	110.76	178.92	473.2	531.53	417.63	432.49	424.94	423.54	147.04	138.2	178.05	148.09	355.82	252.24	293.28	119.74	94.71	233.4
QSCN6L1	158.1	194.7	314.86	198.13	229.63	169.02	148.94	126.71	159.16	189.05	208.71	203.04	167.93	237.13	213.66	239.6	152.58	174.5	152.68	206.83	187.27	218.23	219.32	196.5	179.61	164.12	172.25	138.98	418.99	185.26	257.05	109.97	134.7	309.79	272.18	303.73	101.81	102.36	129.61	136.59	161.24	133.4	133.41	169.4	208.02	222.58	69.2	104.65	222.16
RAB6B	26.85	63.28	74.52	20.19	47.1	65.01	34.37	31.29	42.85	35.91	53.09	75.92	67.74	42.91	44.9	67.55	46.81	38.42	35.23	35.85	63.27	23.07	13.44	36.52	42.39	31.87	24.61	32.9	41.38	29.7	68.47	40.35	42.22	32.34	29.93	30.37	40.13	32.57	47.06	14.18	30.71	19.6	25.53	24.69	16.08	30.11	12.44	26.16	23.34
RACGAP1	67.12	63.28	167.68	106.01	100.1	70.43	157.12	44.58	84.17	50.7	86.05	60.03	98.78	88.08	113.03	132.55	62.42	48.03	46.98	78.6	118.94	40.38	36.04	48.69	47.97	98.79	62.54	35.58	62.07	46.67	52.85	30.06	31.5	78.3	78.38	53.15	42.36	31.79	38.57	29.11	53.75	32.67	27.45	45.12	46.23	66.77	39.65	27.21	55.33
RASSF7	173.01	184.97	87.57	108.53	87.14	145.19	258.6	251.85	234.15	89.77	89.71	192.45	156.64	92.59	58.83	58.63	149.11	150.48	138.58	107.55	88.58	96.14	97.75	99.12	114.9	133.85	430.62	256.47	132.42	271.52	215.01	71.2	97.17	74.9	96.9	94.92	137.47	145.78	149.67	200.03	122	93.11	79.79	193.23	94.46	171.51	126.74	136.57	299.97
RBBP8	354.98	391.84	706.11	816.5	680.66	540.66	623.59	797.02	563.2	210.18	305.74	602.06	413.48	635.73	627.06	583.71	187.26	140.88	199.65	267.5	197.4	344.17	282.24	293.88	228.69	245.39	455.23	365.23	375.54	299.81	331.53	1469.19	958.28	194.05	193.8	172.75	238.54	165.94	201.35	296.31	319.92	354.47	361.29	454.56	300.48	346.96	174.95	154.36	264.52
RECQL5	356.47	309.09	506.76	521.2	455.74	179.86	175.13	197.89	194.36	124.63	166.6	270.13	206.03	341.01	266.31	290.58	553.1	497.87	462.72	277.16	192.34	220.16	219.93	230.41	292.28	339.4	385.51	266.54	548.31	480.82	424.02	250.01	246.61	417.03	473.11	571.4	199.9	221	208.3	275.41	211.57	246.11	224.05	263.89	291.43	276.26	267.47	229.19	579.18
RFC4	229.69	206.87	329.77	257.44	305	201.53	340.44	219	223.44	168.99	208.71	277.2	278	371.5	374.69	373.42	195.92	225.72	180.86	216.48	242.95	311.49	268.8	274.75	269.97	259.73	284.01	158.45	459.34	173.95	177.78	107.6	115.26	301.28	307.81	271.46	346.29	355.15	318.62	129.87	161.24	127.96	117.45	223.88	200.99	222.58	171.84	136.57	178.94
RPL37A	18047.1	20302.6	15508.4	14038.2	13696.8	19967.7	19753.5	21298.1	19506.8	19548.6	23897.5	19121.3	16797.3	29803.6	23298.6	22696	21610.7	21038.8	23500.3	16350.8	16191.6	14576.4	13393	13438.5	15074.8	14307.2	12325	12785.1	21496.8	20511.4	17652.7	6046.05	9664.55	19108.5	18569.5	19456	18397.9	16593.7	16584.3	15020.9	15865.3	16898.5	17970.8	18605.6	20352.1	19437.4	15536.1	13709	16534.4
RPLP0	13135.6	14028.3	13136.7	12609.6	14032.4	12634.6	14070.9	14811.7	13542.7	13659.4	16707.9	5861.74	7151.89	30601.9	29864.9	34186.7	11367.1	9946.27	12373.8	8569.76	8508.33	6262.41	7097.57	7968.69	8321.1	7888.98	9259.39	8042.46	8828.8	7592.79	8766.29	6891.02	8870.45	10956.8	13247	12251.9	8599.99	8015.75	9235.26	8547.53	9774.12	9072.45	10399	18895	16775.5	17236.5	10695.9	10179.6	7406.65
RRM2	249.08	165.5	624.14	555.27	436.89	263.29	256.96	369.96	296.9	207.01	129.99	98.87	282.24	363.6	422.68	375.97	209.8	152.08	204.35	135.13	75.92	1181.53	661.62	913.81	336.9	270.88	180.45	152.4	374.51	241.83	223.42	234.18	277.43	828.95	750.99	670.11	509.77	621.9	511.48	162.71	107.49	267.35	218.31	456.27	230.13	302.44	108.08	100.47	391.6
RTN4RL1	93.96	90.05	156.5	146.39	144.85	87.76	148.94	153.3	131.62	135.19	119	111.23	112.89	106.14	136.25	114.7	156.05	195.31	140.93	100.66	98.7	321.1	273.69	240.84	58.01	57.36	224.54	153.07	126.21	176.77	138.14	34.81	50.93	62.98	57	51.26	206.58	147.33	154.29	60.46	64.84	226.51	185.75	89.38	90.44	73.32	127.52	103.61	98.55
RUNDC1	354.98	365.07	542.16	657.49	564.08	221.03	309.34	196.32	299.96	482.67	256.31	275.43	292.12	280.04	253.92	266.37	497.61	461.05	429.84	416.42	316.34	323.02	340.89	273.01	327.98	325.06	393.71	317.56	406.58	528.91	383.18	169.31	162.84	314.9	310.66	332.21	228.88	231.08	210.61	377.67	277.26	247.2	285.97	312.41	308.52	303.75	377.89	237.04	245.51
SDHA	304.27	333.43	402.43	291.52	333.26	390.06	397.72	390.3	405.56	221.8	357.01	651.5	629.39	482.16	430.42	567.14	495.88	507.48	462.72	322.66	397.33	400.89	365.94	458.21	437.31	470.06	550.58	447.81	486.24	360.62	494.89	268.2	332.38	365.97	369.08	432.82	315.82	302.42	307.04	337.36	371.96	323.43	325.55	432.43	333.64	344.34	311.02	383.03	360.48
SERF1A	383.32	457.55	454.59	499.74	426.3	292.54	361.71	309.73	329.04	248.2	278.28	384.9	340.1	443.77	506.29	523.81	535.76	611.54	495.61	546.04	382.14	233.61	260.25	304.31	387.11	422.25	219.41	189.33	567.97	824.47	613.81	291.15	308.93	347.24	411.83	415.74	324	338.87	333.27	339.6	331.86	268.44	271.29	537.99	497.45	488.36	267.47	244.36	338.87
SF3A1	213.28	206.87	264.56	263.75	297.94	260.04	248.78	223.7	220.38	176.38	238	206.57	218.73	242.77	181.15	249.8	308.62	331.38	286.56	186.15	270.79	222.08	177.16	229.54	150.6	143.41	159.95	169.19	300.02	181.02	241.44	204.12	236.55	313.2	269.33	269.56	176.12	165.17	182.84	246.31	252.52	159.54	171.71	177.06	176.87	196.39	143.85	194.65	235.13
SFRP1	841.21	2730.71	268.29	21.45	256.72	600.25	589.22	338.67	1328.41	326.36	2607.07	37.08	193.33	2286.59	185.79	810.57	128.3	32.02	349.98	97.9	683.3	26.92	17.72	286.06	110.44	602.31	99.45	281.31	521.41	38.18	826.42	26.9	951.58	365.97	98.33	307.53	46.82	22.49	233.76	143.3	1247.25	34.85	171.71	98.74	125.62	352.19	33.43	575.07	163.38
SLC2A3	13.42	38.94	95.02	42.91	38.86	52.01	58.92	36.76	48.97	16.9	23.8	52.97	36.69	37.26	34.06	52.25	24.27	25.61	39.93	24.82	40.49	17.3	7.94	19.13	24.54	30.27	15.38	20.14	27.93	19.8	25.22	9.49	9.38	25.53	29.93	28.48	13.38	17.06	23.14	14.93	21.33	20.69	15.32	17.88	22.11	31.42	10.11	16.22	21.61
SLC39A6	2296.91	2015.17	30869.6	47979	32701.1	3108.54	4214.55	6091.42	3417.44	1757.47	3707.38	1846.8	1706.12	1469.06	1399.65	1456.73	3811	2625.44	3708.84	3472.03	2480.12	4146.42	4537.85	3923.92	5345.85	4898.15	6127.13	4247.15	5605.16	8595.45	7326.06	11574.7	6745.49	1201.73	2151.79	1970.47	1527.83	1312.82	1539.08	8421.4	8473.12	4314.62	3303.33	13914.4	5420.66	7619.95	3555.7	2798.94	9355.99
STC2	5256.04	3918.39	2481.64	2263.98	3200.75	974.06	947.66	1091.11	1392.69	247.14	618.81	2623.66	1741.4	630.08	675.05	945.67	8898.11	10481	6872.74	12436.1	7670.65	356.67	514.39	641.67	6596.42	6633.37	9827.4	7291.19	193.46	475.17	815.61	322	895.29	483.41	424.66	328.41	876.12	574.6	835.5	7296.6	4803.03	4636.42	4940	1000.21	2313.38	2774.34	8931.62	5337.82	6769.54
STK32B	274.44	267.72	435.96	471.98	433.36	224.28	324.07	118.89	234.15	115.12	170.26	247.18	220.14	193.09	233.79	268.92	162.98	136.07	169.12	282.67	354.3	52.88	28.71	56.52	158.41	173.68	187.63	103.39	82.76	115.96	171.77	45.89	51.6	124.26	132.53	89.22	71.34	106.24	128.84	456.04	289.21	274.43	301.29	131.09	183.9	195.08	235.6	233.38	82.12
TFRC	701	562.2	706.11	730.68	684.19	594.84	775.8	799.36	677.98	856.55	635.29	723.89	702.77	771.23	1107.03	808.02	839.18	875.68	737.54	459.17	407.45	1583.39	1503.45	1430.28	655.96	580	287.08	613.64	843.15	634.97	647.44	1231.05	821.57	738.74	762.39	738.45	940.03	1020.48	972.05	444.84	644.95	647.41	580.88	897.21	664.27	730.57	1069.12	870.71	560.17
TGFB3	1079.85	759.34	767.59	521.2	687.72	1322.94	1155.52	1084.85	941.21	557.66	737.81	1191.77	915.86	606.37	834.53	927.82	1159.94	1083.8	1242.54	1758.08	1829.72	583.56	540.66	573.85	889.12	893.9	873.55	431.03	918.68	1112.97	1225.21	530.08	507.96	726.82	708.24	603.67	691.09	549.79	727.5	832.21	779.75	557.57	633.22	872.52	1930.49	1551.48	783.76	994.73	803.08
TMEM45B	38.78	26.77	104.33	75.72	71.83	57.43	83.47	41.45	55.1	117.23	36.62	105.94	52.21	27.1	46.45	47.16	64.15	54.43	68.12	60.67	70.86	25.96	17.72	22.61	66.93	71.7	23.58	26.18	25.86	24.04	27.63	17.41	17.42	47.66	39.9	47.46	26.75	35.67	27	37.32	29.01	23.96	24.89	17.88	28.14	32.73	199.83	193.08	80.39
TSPYL5	111.86	170.36	167.68	46.69	103.63	147.35	134.21	110.28	110.19	74.99	157.45	451.99	310.46	298.1	466.03	389.99	175.12	160.09	143.28	121.34	151.84	42.3	55.59	72.17	112.67	125.88	105.6	90.64	532.79	517.59	420.42	686.73	532.08	233.2	235.13	261.97	459.24	481.55	427.39	81.36	101.52	312.54	326.18	216.22	270.33	260.54	181.17	203.03	108.92
TYMS	480.26	255.55	886.83	730.68	758.38	276.29	286.43	287.83	244.87	190.11	188.57	204.81	254.01	537.49	486.16	433.32	234.07	168.09	199.65	231.65	108.82	1310.36	946.3	1023.37	379.3	267.69	315.79	274.59	402.44	226.27	333.93	151.11	213.1	561.71	505.88	413.84	381.96	458.29	387.28	235.11	163.8	284.23	250.86	779.74	316.56	542.04	135.29	162.74	446.92
UBC	31138	38166.6	56863.5	56097.2	58847.6	52878.7	33678.7	37042.1	44452.7	39253.6	30993.7	38442.1	36020.5	50758.9	41125.6	41339.1	40598	42135.2	44668.1	46571.8	47160.2	60191.8	59236.4	55597.3	34483.7	36101.9	52718.3	45598.8	66905	73154.6	66607.2	38122.1	35556.9	61051.6	48896.9	56817.2	69042.2	64302.8	78310.4	75384.3	53381	37063	39643.8	61413.8	70794.2	74693.8	43613.1	41219.6	32806.9
UBE2C	442.98	328.56	1073.14	1192.57	918.54	236.2	320.8	311.3	264.76	162.65	263.64	420.21	492.5	468.61	383.98	426.95	317.29	272.15	284.21	161.33	139.19	1366.12	1096.59	1178.13	345.83	307.53	572.11	462.58	483.13	876.8	694.29	397.16	444.96	794.91	785.19	679.6	962.32	1001.1	929.62	351.54	261.05	371.89	351.08	496.27	426.1	531.56	256.59	228.67	535.96
UBE2T	304.27	163.06	394.98	314.23	241.41	100.76	122.75	125.93	88.76	83.44	115.34	114.76	142.53	311.65	286.43	257.45	313.83	264.15	227.84	64.81	70.86	422.04	301.79	344.31	120.48	95.6	193.78	136.96	265.88	192.33	190.99	135.29	139.39	374.48	312.08	326.51	398.31	347.4	290.84	111.96	59.72	100.73	84.26	233.24	154.76	209.48	67.65	58.61	204.88
UCHL5	211.79	206.87	204.94	203.18	215.5	191.78	165.31	161.12	157.63	174.27	232.51	120.06	142.53	206.64	275.6	245.98	357.17	381.01	324.14	177.88	126.54	236.5	222.98	261.71	134.98	175.28	163.02	145.02	267.95	195.16	189.79	187.51	153.46	275.75	185.25	193.63	322.51	315.61	268.47	132.11	139.91	123.06	151.28	296.23	238.17	235.67	143.85	120.35	196.23
WISP1	278.91	238.51	329.77	118.63	235.52	256.79	474.65	327.72	321.39	208.07	228.85	413.15	266.71	147.92	204.37	298.23	296.49	470.66	347.63	490.88	447.94	190.35	180.22	186.94	467.43	377.64	156.87	140.32	301.05	343.65	378.37	208.08	152.79	192.34	193.8	151.87	163.48	223.33	250.73	392.6	232.05	257.55	233.63	275.8	941.63	635	490.63	425.94	357.02
ZNF533	80.54	65.71	124.83	133.77	121.29	39.01	109.66	52.4	42.85	24.29	58.59	353.12	218.73	30.49	30.97	87.94	52.02	22.41	54.02	64.81	156.91	27.88	18.94	22.61	20.08	38.24	419.34	91.98	22.76	29.7	32.43	220.73	117.27	328.52	391.88	263.87	28.98	10.86	41.66	762.8	519.55	759.58	725.14	35.75	64.32	40.59	292.36	175.29	25.07
NEG_A	20	26	36	23	47	26	30	34	22	19	17	12	20	29	23	33	26	26	22	18	16	28	12	23	24	22	27	34	25	18	29	21	23	28	22	22	31	16	38	17	37	30	36	29	19	27	29	23	19
NEG_B	54	57	49	66	87	59	88	57	59	60	64	66	51	69	50	102	69	56	63	63	47	60	75	73	70	65	69	70	82	44	80	50	63	69	69	58	64	41	62	54	86	74	64	66	50	57	45	78	60
NEG_C	15	17	27	37	42	23	47	28	31	15	16	12	9	32	40	45	18	26	15	21	12	30	13	18	16	16	20	19	24	15	27	11	10	26	15	16	28	22	21	19	29	22	18	24	25	23	14	21	20
NEG_D	13	14	16	27	35	24	27	24	16	15	14	28	12	26	11	33	15	8	6	19	17	5	16	12	22	11	16	19	17	11	9	13	18	24	15	11	15	20	24	10	13	26	16	8	20	17	13	19	16
NEG_E	17	28	24	19	35	24	26	23	23	16	19	11	14	18	21	34	22	24	21	19	17	29	10	21	15	21	24	22	19	8	20	16	17	13	21	23	24	21	18	22	30	33	16	27	36	7	27	24	27
NEG_F	22	24	24	32	34	19	36	31	29	24	18	24	28	30	32	42	33	25	22	24	25	16	24	30	20	26	17	23	44	22	34	14	30	40	32	19	29	19	32	22	32	18	31	26	17	29	15	20	24
NEG_G	71	53	82	95	101	89	125	73	90	57	48	91	85	84	98	135	43	39	28	79	73	28	24	35	88	82	48	51	41	29	48	36	43	39	67	24	34	36	62	41	65	49	67	54	35	40	53	60	56
NEG_H	49	39	92	94	128	94	117	102	98	55	51	86	87	93	70	115	52	49	33	79	60	35	25	41	72	74	76	51	58	28	57	36	44	43	76	38	37	42	70	40	68	80	65	74	51	57	53	47	76
POS_A	32900	32111	29538	28110	43825	33245	42033	35165	29757	34458	34246	30570	36414	32271	24888	45191	40044	33079	29290	31457	28558	33167	37293	40529	32412	33475	40797	39312	41076	18041	35585	28761	33746	36987	43329	34935	32660	22759	32538	34371	44053	42686	41497	28919	26267	32033	29111	41049	33879
POS_B	12512	12051	12351	11695	16754	12655	15823	13260	12459	12477	12475	11015	13101	13368	11024	16989	15799	13841	12331	11821	10871	13520	14262	15526	12264	12766	14193	14396	16152	7839	14212	10700	12665	15880	15868	14352	13286	9418	13533	12186	15260	15076	15014	11713	11159	12569	11165	14663	12500
POS_C	4173	4199	3741	3491	5157	4108	4448	4186	3819	4281	4446	3812	4271	4150	3447	5489	4648	3958	3738	3978	3629	4130	3989	4664	4068	4380	4583	4809	4754	2314	4316	3665	4431	4885	4846	4312	3847	2834	4152	4117	4804	4892	5035	3500	3329	3865	3733	4923	4127
POS_D	565	553	517	528	724	591	673	671	596	586	581	532	586	627	486	819	694	562	530	575	487	595	605	702	591	566	640	642	770	362	581	531	594	635	759	637	546	425	604	594	725	749	735	512	518	586	524	709	587
POS_E	242	223	202	207	341	256	306	271	243	216	238	210	202	279	226	298	290	237	222	222	167	241	246	258	239	222	244	277	294	149	263	219	226	262	309	249	239	209	253	238	278	283	259	211	188	222	236	268	210
POS_F	69	64	93	62	114	99	106	101	89	84	78	78	78	80	60	101	89	88	82	76	71	83	76	97	101	85	78	94	122	56	91	77	81	94	92	103	76	86	86	77	85	118	97	90	68	62	84	105	78
[truncated: 132 more columns]
